# Supplementary material for: Computer-aided solvent screening for the fractionation of wet microalgae biomass
Source: Royal Society of Chemistry journal article supplement (doi:10.1039/d1gc03471e), 2021-01-01
Supplement: d1gc03471e1.zip [file d1gc03471e1.zip]

## Sheet: database
Conventional solvents
	COSMO-Name	CAS-Number	Smiles
0	h2o_c0	7732-18-5	O
1	1-octanol_c0	111-87-5	CCCCCCCCO
2	4-aminonitrobenzene_c0	100-01-6	Nc1ccc([N+](=O)[O-])cc1
3	1,4-dinitrobenzene_c0	100-25-4	O=[N+]([O-])c1ccc([N+](=O)[O-])cc1
4	ethylbenzene_c0	100-41-4	CCc1ccccc1
5	styrene_c0	100-42-5	C=Cc1ccccc1
6	benzylamine_c0	100-46-9	NCc1ccccc1
7	benzonitrile_c0	100-47-0	N#Cc1ccccc1
8	4-pyridinecarbonitrile_c0	100-48-1	N#Cc1ccncc1
9	benzylalcohol_c0	100-51-6	OCc1ccccc1
10	benzaldehyde_c0	100-52-7	O=Cc1ccccc1
11	n-methylaniline_c0	100-61-8	CNc1ccccc1
12	cyclohexanoneoxime_c0	100-64-1	ON=C1CCCCC1
13	anisole_c0	100-66-3	COc1ccccc1
14	pocl3_c0	10025-87-3	O=P(Cl)(Cl)Cl
15	diphenylether_c0	101-84-8	c1ccc(Oc2ccccc2)cc1
16	triethanolamine_c0	102-71-6	OCCN(CCO)CCO
17	tri-n-butylamine_c0	102-82-9	CCCCN(CCCC)CCCC
18	n-ethylaniline_c0	103-69-5	CCNc1ccccc1
19	ethoxybenzene_c0	103-73-1	CCOc1ccccc1
20	2-ethyl-1-hexanol_c0	104-76-7	CCCCC(CC)CO
21	ethylpropionate_c0	105-37-3	CCOC(=O)CC
22	ethylbutyrate_c0	105-54-4	CCCC(=O)OCC
23	1,4-dimethylbenzene_c0	106-42-3	Cc1ccc(C)cc1
24	4-methylphenol_c0	106-44-5	Cc1ccc(O)cc1
25	4-chlorophenol_c0	106-48-9	Oc1ccc(Cl)cc1
26	1,2-dibromoethane_c0	106-93-4	BrCCBr
27	1-bromopropane_c0	106-94-5	CCCBr
28	butane_c0	106-97-8	CCCC
29	1-propanethiol_c0	107-03-9	CCCS
30	3-chloropropene_c0	107-05-1	C=CCCl
31	1,2-dichloroethane_c0	107-06-2	ClCCCl
32	1-iodopropane_c0	107-08-4	CCCI
33	n-propylamine_c0	107-10-8	CCCN
34	propionitrile_c0	107-12-0	CCC#N
35	2-propen-1-ol_c0	107-18-6	C=CCO
36	glycol_c0	107-21-1	OCCO
37	methylformate_c0	107-31-3	COC=O
38	octamethyltrisiloxane_c0	107-51-7	C[Si](C)(C)O[Si](C)(C)O[Si](C)(C)C
39	2-methylpentane_c0	107-83-5	CCCC(C)C
40	2-pentanone_c0	107-87-9	CCCC(C)=O
41	butyricacid_c0	107-92-6	CCCC(=O)O
42	1-nitropropane_c0	108-03-2	CCC[N+](=O)[O-]
43	4-methyl-2-pentanone_c0	108-10-1	CC(=O)CC(C)C
44	diisopropylamine_c0	108-18-9	CC(C)NC(C)C
45	diisopropylether_c0	108-20-3	CC(C)OC(C)C
46	isopropylacetate_c0	108-21-4	CC(=O)OC(C)C
47	aceticanhydride_c0	108-24-7	CC(=O)OC(C)=O
48	1,3-dimethylbenzene_c0	108-38-3	Cc1cccc(C)c1
49	3-hydroxytoluene_c0	108-39-4	Cc1cccc(O)c1
50	3-chlorophenol_c0	108-43-0	Oc1cccc(Cl)c1
51	bromobenzene_c0	108-86-1	Brc1ccccc1
52	methylcyclohexane_c0	108-87-2	CC1CCCCC1
53	toluene_c0	108-88-3	Cc1ccccc1
54	chlorobenzene_c0	108-90-7	Clc1ccccc1
55	cyclohexylamine_c0	108-91-8	NC1CCCCC1
56	cyclohexanol_c0	108-93-0	OC1CCCCC1
57	cyclohexanone_c0	108-94-1	O=C1CCCCC1
58	phenol_c0	108-95-2	Oc1ccccc1
59	3-picoline_c0	108-99-6	Cc1cccnc1
60	2-methylpyridine_c0	109-06-8	Cc1ccccn1
61	n-propylacetate_c0	109-60-4	CCCOC(C)=O
62	1-bromobutane_c0	109-65-9	CCCCBr
63	pentane_c0	109-66-0	CCCCC
64	pentene_c0	109-67-1	C=CCCC
65	1-chlorobutane_c0	109-69-3	CCCCCl
66	1-butylamine_c0	109-73-9	CCCCN
67	butyronitrile_c0	109-74-0	CCCC#N
68	2-methoxyethanol_c0	109-86-4	COCCO
69	diethylamine_c0	109-89-7	CCNCC
70	ethylformate_c0	109-94-4	CCOC=O
71	pyrrole_c0	109-97-7	c1cc[nH]c1
72	thf_c0	109-99-9	C1CCOC1
73	furane_c0	110-00-9	c1ccoc1
74	tetrahydrothiophene_c0	110-01-0	C1CCSC1
75	thiophene_c0	110-02-1	c1ccsc1
76	hexane_c0	110-54-3	CCCCCC
77	n-pentylamine_c0	110-58-7	CCCCCN
78	valeraldehyde_c0	110-62-3	CCCCC=O
79	n-propylformate_c0	110-74-7	CCCOC=O
80	ethoxyethanol_c0	110-80-5	CCOCCO
81	cyclohexane_c0	110-82-7	C1CCCCC1
82	cyclohexene_c0	110-83-8	C1=CCCCC1
83	pyridine_c0	110-86-1	c1ccncc1
84	piperidine_c0	110-89-4	C1CCNCC1
85	morpholine_c0	110-91-8	C1COCCN1
86	1-hexanol_c0	111-27-3	CCCCCCO
87	di-n-propylether_c0	111-43-3	CCCOCCC
88	diethyleneglycol_c0	111-46-6	OCCOCCO
89	octane_c0	111-65-9	CCCCCCCC
90	hexanedinitrile_c0	111-69-3	N#CCCCCC#N
91	1-heptanol_c0	111-70-6	CCCCCCCO
92	2-butoxyethanol_c0	111-76-2	CCCCOCCO
93	n-nonane_c0	111-84-2	CCCCCCCCC
94	dibutylamine_c0	111-92-2	CCCCNCCCC
95	dodecane_c0	112-40-3	CCCCCCCCCCCC
96	dimethylether_c0	115-10-6	COC
97	hexachlorobenzene_c0	118-74-1	Clc1c(Cl)c(Cl)c(Cl)c(Cl)c1Cl
98	indole_c0	120-72-9	c1ccc2[nH]ccc2c1
99	cyclopentanone_c0	120-92-3	O=C1CCCC1
100	triethylamine_c0	121-44-8	CCN(CC)CC
101	n,n-dimethylaniline_c0	121-69-7	CN(C)c1ccccc1
102	propanal_c0	123-38-6	CCC=O
103	methylformamide_c0	123-39-7	CNC=O
104	4-oh-4-me-2-pentanone_c0	123-42-2	CC(=O)CC(C)(C)O
105	isopentanol_c0	123-51-3	CC(C)CCO
106	acetylacetone_c0	123-54-6	CC(=O)CC(C)=O
107	paraldehyde_c0	123-63-7	CC1OC(C)OC(C)O1
108	pyrrolidine_c0	123-75-1	C1CCNC1
109	n-butylacetate_c0	123-86-4	CCCCOC(C)=O
110	dioxane_c0	123-91-1	C1COCCO1
111	caprylicacid_c0	124-07-2	CCCCCCCC(=O)O
112	n-decane_c0	124-18-5	CCCCCCCCCC
113	co2_c0	124-38-9	O=C=O
114	dimethylamine_c0	124-40-3	CNC
115	tetrachloroethene_c0	127-18-4	ClC(Cl)=C(Cl)Cl
116	n,n-dimethylacetamide_c0	127-19-5	CC(=O)N(C)C
117	h2_c0	1333-74-0	[H][H]
118	2-methyl-1-butanol_c0	137-32-6	CCC(C)CO
119	h3o_cation_c0	13968-08-6	[OH3+]
120	ethanolamine_c0	141-43-5	NCCO
121	ethylacetate_c0	141-78-6	CCOC(C)=O
122	cyclopentene_c0	142-29-0	C1=CCCC1
123	n-heptane_c0	142-82-5	CCCCCCC
124	dipropylamine_c0	142-84-7	CCCNCCC
125	di-n-butylether_c0	142-96-1	CCCCOCCCC
126	1-nonanol_c0	143-08-8	CCCCCCCCCO
127	oxalicacid_c0	144-62-7	O=C(O)C(=O)O
128	nh4_cation_c0	14798-03-9	[NH4+]
129	cis-1,2-dichloroethene_c0	156-59-2	ClC=CCl
130	cl_anion_c0	16887-00-6	[Cl-]
131	PET_c0	25038-59-9
132	cyclopentane_c0	287-92-3	C1CCCC1
133	pyridazine_c0	289-80-5	c1ccnnc1
134	pyrimidine_c0	289-95-2	c1cncnc1
135	hydrazine_c0	302-01-2	NN
136	diethylsulfide_c0	352-93-2	CCSCC
137	pentafluoroethane_c0	354-33-6	FC(F)C(F)(F)F
138	hexafluorobenzene_c0	392-56-3	Fc1c(F)c(F)c(F)c(F)c1F
139	1,1,1,3,3-pentafluorobutane_c0	406-58-6	CC(F)(F)CC(F)(F)F
140	fluorobenzene_c0	462-06-6	Fc1ccccc1
141	indane_c0	496-11-7	c1ccc2c(c1)CCC2
142	aspirin_c0	50-78-2	CC(=O)Oc1ccccc1C(=O)O
143	5-nonanone_c0	502-56-7	CCCCC(=O)CCCC
144	2-methyl-2-butene_c0	513-35-9	CC=C(C)C
145	1-chloropropane_c0	540-54-5	CCCCl
146	1,3-dichlorobenzene_c0	541-73-1	Clc1cccc(Cl)c1
147	1-iodobutane_c0	542-69-8	CCCCI
148	1-chloropentane_c0	543-59-9	CCCCCCl
149	1-chlorohexane_c0	544-10-5	CCCCCCCl
150	n-hexadecane_c0	544-76-3	CCCCCCCCCCCCCCCC
151	methylpropionate_c0	554-12-1	CCC(=O)OC
152	ccl4_c0	56-23-5	ClC(Cl)(Cl)Cl
153	glycine_c0	56-40-6	[NH3+]CC(=O)[O-]
154	glycerol_c0	56-81-5	OCC(O)CO
155	2,3-dimethylpyridine_c0	583-61-9	Cc1cccnc1C
156	3-pentanol_c0	584-02-1	CCC(O)CC
157	iodobenzene_c0	591-50-4	Ic1ccccc1
158	2-hexanone_c0	591-78-6	CCCCC(C)=O
159	2,5-dimethylhexane_c0	592-13-2	CC(C)CCC(C)C
160	1-hexene_c0	592-41-6	C=CCCCC
161	octadecane_c0	593-45-3	CCCCCCCCCCCCCCCCCC
162	diethylether_c0	60-29-7	CCOCC
163	acetamide_c0	60-35-5	CC(N)=O
164	aniline_c0	62-53-3	Nc1ccccc1
165	methylbutyrate_c0	623-42-7	CCCC(=O)OC
166	dimethyldisulfide_c0	624-92-0	CSSC
167	n-pentylacetate_c0	628-63-7	CCCCCOC(C)=O
168	hexanenitrile_c0	628-73-9	CCCCCC#N
169	ethanol_c0	64-17-5	CCO
170	formicacid_c0	64-18-6	O=CO
171	aceticacid_c0	64-19-7	CC(=O)O
172	thymine_c0	65-71-4	Cc1c[nH]c(=O)[nH]c1=O
173	benzoicacid_c0	65-85-0	O=C(O)c1ccccc1
174	methanol_c0	67-56-1	CO
175	2-propanol_c0	67-63-0	CC(C)O
176	propanone_c0	67-64-1	CC(C)=O
177	chcl3_c0	67-66-3	ClC(Cl)Cl
178	dimethylsulfoxide_c0	67-68-5	CS(C)=O
179	dimethylformamide_c0	68-12-2	CN(C)C=O
180	cycloserine_c0	68-41-7	NC1CONC1=O
181	salicylicacid_c0	69-72-7	O=C(O)c1ccccc1O
182	propanol_c0	71-23-8	CCCO
183	1-butanol_c0	71-36-3	CCCCO
184	1-pentanol_c0	71-41-0	CCCCCO
185	benzene_c0	71-43-2	c1ccccc1
186	1,1,1-trichloroethane_c0	71-55-6	CC(Cl)(Cl)Cl
187	methane_c0	74-82-8	C
188	ethane_c0	74-84-0	CC
189	ch3i_c0	74-88-4	CI
190	methylamine_c0	74-89-5	CN
191	hcn_c0	74-90-8	C#N
192	methanethiol_c0	74-93-1	CS
193	ch2br2_c0	74-95-3	BrCBr
194	bromoethane_c0	74-96-4	CCBr
195	propane_c0	74-98-6	CCC
196	na_cation_c0	7440-23-5	[Na+]
197	iodoethane_c0	75-03-6	CCI
198	ethylamine_c0	75-04-7	CCN
199	acetonitrile_c0	75-05-8	CC#N
200	acetaldehyde_c0	75-07-0	CC=O
201	ethanethiol_c0	75-08-1	CCS
202	ch2cl2_c0	75-09-2	ClCCl
203	difluoromethane_c0	75-10-5	FCF
204	formamide_c0	75-12-7	NC=O
205	cs2_c0	75-15-0	S=C=S
206	dimethylsulfide_c0	75-18-3	CSC
207	chbr3_c0	75-25-2	BrC(Br)Br
208	2-bromopropane_c0	75-26-3	CC(C)Br
209	2-chloropropane_c0	75-29-6	CC(C)Cl
210	2-iodopropane_c0	75-30-9	CC(C)I
211	isopropylamine_c0	75-31-0	CC(C)N
212	2-propanethiol_c0	75-33-2	CC(C)S
213	1,1-dichloroethane_c0	75-34-3	CC(Cl)Cl
214	trimethylamine_c0	75-50-3	CN(C)C
215	nitromethane_c0	75-52-5	C[N+](=O)[O-]
216	2-amino-2-methylpropane_c0	75-64-9	CC(C)(C)N
217	tert-butanol_c0	75-65-0	CC(C)(C)O
218	cfcl3_c0	75-69-4	FC(Cl)(Cl)Cl
219	dichlorodifluoromethane_c0	75-71-8	FC(F)(Cl)Cl
220	pentachloroethane_c0	76-01-7	ClC(Cl)C(Cl)(Cl)Cl
221	trifluoroaceticacid_c0	76-05-1	O=C(O)C(F)(F)F
222	nh3_c0	7664-41-7	N
223	pcl3_c0	7719-12-2	ClP(Cl)Cl
224	br2_c0	7726-95-6	BrBr
225	sulfurylchloride_c0	7791-25-5	O=S(=O)(Cl)Cl
226	isophorone_c0	78-59-1	CC1=CC(=O)CC(C)(C)C1
227	methylbutane_c0	78-78-4	CCC(C)C
228	2-methyl-1-propanamine_c0	78-81-9	CC(C)CN
229	2-butanol_c0	78-92-2	CCC(C)O
230	butanone_c0	78-93-3	CCC(C)=O
231	1,1,2-trichloroethane_c0	79-00-5	ClCC(Cl)Cl
232	trichloroethene_c0	79-01-6	ClC=C(Cl)Cl
233	propionicacid_c0	79-09-4	CCC(=O)O
234	methylacetate_c0	79-20-9	COC(C)=O
235	nitroethane_c0	79-24-3	CC[N+](=O)[O-]
236	isobutyricacid_c0	79-31-2	CC(C)C(=O)O
237	1,1,2,2-tetrachloroethane_c0	79-34-5	ClC(Cl)C(Cl)Cl
238	2-nitropropane_c0	79-46-9	CC(C)[N+](=O)[O-]
239	naphthalene_c0	91-20-3	c1ccc2ccccc2c1
240	chinoline_c0	91-22-5	c1ccc2ncccc2c1
241	methylbenzoate_c0	93-58-3	COC(=O)c1ccccc1
242	1,2-dimethylbenzene_c0	95-47-6	Cc1ccccc1C
243	2-methylphenol_c0	95-48-7	Cc1ccccc1O
244	1,2-dichlorobenzene_c0	95-50-1	Clc1ccccc1Cl
245	2-chloroaniline_c0	95-51-2	Nc1ccccc1Cl
246	2-chlorophenol_c0	95-57-8	Oc1ccccc1Cl
247	1,2,4-trimethylbenzene_c0	95-63-6	Cc1ccc(C)c(C)c1
248	3-methylpentane_c0	96-14-0	CCC(C)CC
249	3-pentanone_c0	96-22-0	CCC(=O)CC
250	methylcyclopentane_c0	96-37-7	CC1CCCC1
251	furfural_c0	98-01-1	O=Cc1ccco1
252	isopropylbenzene_c0	98-82-8	CC(C)c1ccccc1
253	acetophenone_c0	98-86-2	CC(=O)c1ccccc1
254	niacinamide_c0	98-92-0	NC(=O)c1cccnc1
255	nitrobenzene_c0	98-95-3	O=[N+]([O-])c1ccccc1
256	1-butyl-2,3-dimethyl-imidazolium_cation_c0		CCCC[n+]1ccn(C)c1C
257	1-butyl-3-methyl-imidazolium_cation_c0		CCCC[n+]1ccn(C)c1
258	1-ethyl-2,3-dimethyl-imidazolium_cation_c0		CC[n+]1ccn(C)c1C
259	1-ethyl-3-methyl-imidazolium_cation_c0		CC[n+]1ccn(C)c1
260	1-heptyl-3-methyl-imidazolium_cation_c0		CCCCCCC[n+]1ccn(C)c1
261	1-hexyl-3-methyl-imidazolium_cation_c0		CCCCCC[n+]1ccn(C)c1
262	1-octyl-3-methyl-imidazolium_cation_c0		CCCCCCCC[n+]1ccn(C)c1
263	1-pentyl-3-methyl-imidazolium_cation_c0		CCCCC[n+]1ccn(C)c1
264	4-methyl-n-butylpyridinium_cation_c0		CCCC[n+]1ccc(C)cc1
265	bf4_anion_c0		F[B-](F)(F)F
266	bis(trifluoromethyl)imide_anion_c0		FC(F)(F)[N-]C(F)(F)F
267	butylsulfate_anion_c0		CCCCOS(=O)(=O)[O-]
268	ethylsulfate_anion_c0		CCOS(=O)(=O)[O-]
269	pf6_anion_c0		F[P-](F)(F)(F)(F)F
270	toluene-4-sulfonate_anion_c0		Cc1ccc(S(=O)(=O)[O-])cc1
271	((1,1-dimethylethoxy)methyl)oxirane_c0	007665-72-7	CC(C)(C)OCC1CO1
272	((1-methylethyl)thio)benzene_c0	003019-20-3	CC(C)Sc1ccccc1
273	(1,1-dimethylbutyl)benzene_c0	001985-57-5	CCCC(C)(C)c1ccccc1
274	(1,1-dimethylethyl)benzene_c0	000098-06-6	CC(C)(C)c1ccccc1
275	(1,1-dimethylethyl)-urea_c0	001118-12-3	CC(C)(C)NC(N)=O
276	(1,1-dimethylpropyl)benzene_c0	002049-95-8	CCC(C)(C)c1ccccc1
277	(1,2-propadienylsulfonyl)-benzene_c0	002525-42-0	C=C=CS(=O)(=O)c1ccccc1
278	(18)-annulene_c0	002040-73-5	c1ccccccccccccccccc1
279	(1-chloroethenyl)benzene_c0	000618-34-8	C=C(Cl)c1ccccc1
280	(1-ethyl-1-methylpropyl)benzene_c0	001985-97-3	CCC(C)(CC)c1ccccc1
281	(1-methylbutyl)benzene_c0	002719-52-0	CCCC(C)c1ccccc1
282	(1-methylenepropyl)-benzene_c0	002039-93-2	C=C(CC)c1ccccc1
283	(1-methylethyl)-cyclopentane_c0	003875-51-2	CC(C)C1CCCC1
284	(1-methylpropyl)-urea_c0	000689-11-2	CCC(C)NC(N)=O
285	(1-methylvinyl)cyclopropane_c0	004663-22-3	C=C(C)C1CC1
286	(2-(1,1-dimethylethoxy)methylethoxy)-2-propanol_c0	032739-31-2	CC(O)COCC(C)OC(C)(C)C
287	(2,2)metacyclophane_c0	002319-97-3	c1cc2cc(c1)CCc1cccc(c1)CC2
288	(2,2)paracyclophane_c0	001633-22-3	c1cc2ccc1CCc1ccc(cc1)CC2
289	(2,4,5-trichlorophenoxy)-aceticacid_c0	000093-76-5	O=C(O)COc1cc(Cl)c(Cl)cc1Cl
290	(2,4-dihydroxyphenyl)phenyl-methanone_c0	000131-56-6	O=C(c1ccccc1)c1ccc(O)cc1O
291	(2-chloroethoxy)benzene_c0	000622-86-6	ClCCOc1ccccc1
292	(2-ethoxymethylethoxy)-2-propanol_c0	030025-38-8	CCOCC(C)OCC(C)O
293	(2-methyl-1-propenyl)benzene_c0	000768-49-0	CC(C)=Cc1ccccc1
294	(2-methylbutyl)benzene_c0	003968-85-2	CCC(C)Cc1ccccc1
295	(2-methylphenyl)thiourea_c0	000614-78-8	Cc1ccccc1NC(N)=S
296	(2-methylpropoxy)benzene_c0	001126-75-6	CC(C)COc1ccccc1
297	(2-propenyloxy)methyl-oxirane_c0	000106-92-3	C=CCOCC1CO1
298	(3,3,3-trifluoropropyl)methyldichlorosilane_c0	000675-62-7	C[Si](Cl)(Cl)CCC(F)(F)F
299	(3b)-cholest-5-en-3-ol_c0	000057-88-5	CC(C)CCCC(C)C1CCC2C3CC=C4CC(O)CCC4(C)C3CCC12C
300	(3-chloropropyl)dimethylchlorosilane_c0	010605-40-0	C[Si](C)(Cl)CCCCl
301	(3-chloropropyl)trimethoxy-silane_c0	002530-87-2	CO[Si](CCCCl)(OC)OC
302	(3-chloropropyl)trimethylsilane_c0	002344-83-4	C[Si](C)(C)CCCCl
303	(3-methylacryloxypropyl)trichlorosilane_c0	007351-61-3	C=C(C)C(=O)OCCC[Si](Cl)(Cl)Cl
304	(3-methylbutyl)benzene_c0	002049-94-7	CC(C)CCc1ccccc1
305	(4-ethoxyphenyl)-urea_c0	000150-69-6	CCOc1ccc(NC(N)=O)cc1
306	(4-hydroxyphenyl)acetonitrile_c0	014191-95-8	N#CCc1ccc(O)cc1
307	(4-nitrophenyl)hydrazine_c0	000100-16-3	NNc1ccc([N+](=O)[O-])cc1
308	(aminoiminomethyl)-urea_c0	000141-83-3	N=C(N)NC(N)=O
309	(bromomethyl)chlorodimethylsilane_c0	016532-02-8	C[Si](C)(Cl)CBr
310	(bromomethyl)trimethylsilane_c0	018243-41-9	C[Si](C)(C)CBr
311	(butoxymethyl)benzene_c0	000588-67-0	CCCCOCc1ccccc1
312	(c-chloroethoxy)ethene_c0	000110-75-8	C=COCCCl
313	(chloromethyl)-benzene_c0	000100-44-7	ClCc1ccccc1
314	(chloromethyl)cyclopropane_c0	005911-08-0	ClCC1CC1
315	(chloromethyl)dimethylphenylsilane_c0	001833-51-8	C[Si](C)(CCl)c1ccccc1
316	(chloromethyl)-oxirane_c0	000106-89-8	ClCC1CO1
317	(chloromethyl)trimethylsilane_c0	002344-80-1	C[Si](C)(C)CCl
318	(di)nitrogenoxide_c0	010102-03-1	O=[N+]([O-])O[N+](=O)[O-]
319	(dichloromethyl)-benzene_c0	000098-87-3	ClC(Cl)c1ccccc1
320	(dichloromethyl)dimethylchlorosilane_c0	018171-59-0	C[Si](C)(Cl)C(Cl)Cl
321	(dinitromethyl)benzene_c0	000611-38-1	O=[N+]([O-])C(c1ccccc1)[N+](=O)[O-]
322	(e)-(1-methyl-1-propenyl)benzene_c0	000768-00-3	CC=C(C)c1ccccc1
323	(e)-(2-phenylethenyl)-sulfonylbenzene_c0	016212-06-9	O=S(=O)(C=Cc1ccccc1)c1ccccc1
324	(e)-1,1'-(1,2-ethenediyl)bis-benzene_c0	000103-30-0	C(=Cc1ccccc1)c1ccccc1
325	(e)-1,2-diiodoethylene_c0	000590-27-2	IC=CI
326	(e)-1,3-hexadiene_c0	020237-34-7	C=CC=CCC
327	(e)-1-methyl-4-(1-propenylsulfonyl)-benzene_c0	032228-15-2	CC=CS(=O)(=O)c1ccc(C)cc1
328	(e)-1-methyl-4-(2-phenylethenyl)sulfonylbenzene_c0	016212-08-1	Cc1ccc(S(=O)(=O)C=Cc2ccccc2)cc1
329	(e)-1-propenylbenzene_c0	000637-50-3	CC=Cc1ccccc1
330	(e)-2-butenedinitrile_c0	000764-42-1	N#CC=CC#N
331	(e)-2-butenedioicacid-di-2-propenylester_c0	002807-54-7	C=CCOC(=O)C=CC(=O)OCC=C
332	(e)-2-butenedioicaciddimethylester_c0	000624-49-7	COC(=O)C=CC(=O)OC
333	(e)-2-butenedioicaciddipropylester_c0	014595-35-8	CCCOC(=O)C=CC(=O)OCCC
334	(e)-2-butenenitrile_c0	000627-26-9	CC=CC#N
335	(e)-2-decene_c0	020063-97-2	CC=CCCCCCCC
336	(e)-2-dodecene_c0	007206-13-5	CC=CCCCCCCCCC
337	(e)-2-methyl-1,3-pentadiene_c0	000926-54-5	C=C(C)C=CC
338	(e)-2-methyl-2-butenedioicacid_c0	000498-24-8	CC(=CC(=O)O)C(=O)O
339	(e)-2-penten-1-ol_c0	001576-96-1	CCC=CCO
340	(e-)-3-hexenedinitrile_c0	001119-85-3	N#CCC=CCC#N
341	(e)-3-methyl-2-pentene_c0	000616-12-6	CC=C(C)CC
342	(e)-3-penten-2-one_c0	003102-33-8	CC=CC(C)=O
343	(e)-4-hexen-1-ol_c0	000928-92-7	CC=CCCCO
344	(e)-4-octene_c0	014850-23-8	CCCC=CCCC
345	(e)-5-undecene_c0	000764-97-6	CCCCC=CCCCCC
346	(e,z)-2,4-hexadiene_c0	005194-50-3	CC=CC=CC
347	(e,z,z)-1,5,9-cyclododecatriene_c0	002765-29-9	C1=CCCC=CCCC=CCC1
348	(ethenyloxy)-benzene_c0	000766-94-9	C=COc1ccccc1
349	(ethoxymethyl)-benzene_c0	000539-30-0	CCOCc1ccccc1
350	(ethoxymethylene)propanedinitrile_c0	000123-06-8	CCOC=C(C#N)C#N
351	(ethylthio)aceticacid_c0	000627-04-3	CCSCC(=O)O
352	(fluoromethyl)oxirane_c0	000503-09-3	FCC1CO1
353	(methyleneamino)acetonitrile_c0	000109-82-0	C=NCC#N
354	(methyleneamino)-methylene_c0	088333-02-2	C=NC
355	(methylthio)-ethane_c0	000624-89-5	CCSC
356	(phenoxymethyl)-oxirane_c0	000122-60-1	c1ccc(OCC2CO2)cc1
357	(phenylmethyl)selenopropanoicacid_c0	006926-05-2	O=C(O)CC[Se]Cc1ccccc1
358	(propylthio)benzene_c0	000874-79-3	CCCSc1ccccc1
359	(trichloromethyl)-benzene_c0	000098-07-7	ClC(Cl)(Cl)c1ccccc1
360	(trichloromethyl)-phosphonousdifluoride_c0	001112-03-4	FP(F)C(Cl)(Cl)Cl
361	(z)-1,2-dimethylcyclopentane_c0	001192-18-3	CC1CCCC1C
362	(z)-1,3-dimethoxy-5-(2-phenylethenyl)-benzene_c0	02195-65-69	COc1cc(C=Cc2ccccc2)cc(OC)c1
363	(z)-1,3-dimethylcyclopentane_c0	002532-58-3	CC1CCC(C)C1
364	(z)-1,3-pentadiene_c0	001574-41-0	C=CC=CC
365	(z)-2-butenedioicacid_c0	000110-16-7	O=C(O)C=CC(=O)O
366	(z)-2-butenedioicaciddibutylester_c0	000105-76-0	CCCCOC(=O)C=CC(=O)OCCCC
367	(z)-2-butenoicacid_c0	000503-64-0	CC=CC(=O)O
368	(z)-2-hexene_c0	007688-21-3	CC=CCCC
369	(z-)-2-hexenedinitrile_c0	002141-58-4	N#CC=CCCC#N
370	(z)-2-methyl-2-pentenal_c0	000623-36-9	CCC=C(C)C=O
371	(z)-2-octene_c0	007642-04-8	CC=CCCCCC
372	(z)-2-pentene_c0	000627-20-3	CC=CCC
373	(z)-3-hexenal_c0	006789-80-6	CCC=CCC=O
374	(z)-3-phenyl-2-propenoicacid_c0	000621-82-9	O=C(O)C=Cc1ccccc1
375	(z)-4,4-dimethyl-2-pentene_c0	000762-63-0	CC=CC(C)(C)C
376	(z)-9-cycloheptadecen-1-one_c0	000542-46-1	O=C1CCCCCCCC=CCCCCCCC1
377	(z)-9-octadecenoicacid-2,3-dihydroxypropylester_c0	000111-03-5	CCCCCCCCC=CCCCCCCCC(=O)OCC(O)CO
378	(z,z)-9,12-octadecadienoicacid_c0	000060-33-3	CCCCCC=CCC=CCCCCCCCC(=O)O
379	[1,1'-biphenyl]-2,2'-dicarboxylicacid_c0	000482-05-3	O=C(O)c1ccccc1-c1ccccc1C(=O)O
380	[1,1'-biphenyl]-3-ol_c0	000580-51-8	Oc1cccc(-c2ccccc2)c1
381	[1,2,5]selenadiazolo[3,4-d]pyrimidine_c0	003434-54-6	Cn1c(=O)c2n[se]nc2n(C)c1=O
382	[3-(2,3-epoxyproxy)propyl]trimethoxysilane_c0	002530-83-8	CO[Si](CCCOCC1CO1)(OC)OC
383	[3-(glycidyloxy)propyl]methyldiethoxysilane_c0	002897-60-1	CCO[Si](C)(CCCOCC1CO1)OCC
384	[3-(mercapto)propyl]triethoxysilane_c0	014814-09-6	CCO[Si](CCCS)(OCC)OCC
385	1-(1,1-dimethylethoxy)-2-propanol_c0	057018-52-7	CC(O)COC(C)(C)C
386	1-(1,1-dimethylethyl)-3,5-dimethylbenzene_c0	000098-19-1	Cc1cc(C)cc(C(C)(C)C)c1
387	1-(1,1-dimethylethyl)-3-methylbenzene_c0	001075-38-3	Cc1cccc(C(C)(C)C)c1
388	1-(1,1-dimethylethyl)-4-ethenylbenzene_c0	001746-23-2	C=Cc1ccc(C(C)(C)C)cc1
389	1-(1-cyclohexen-1-yl)ethanone_c0	000932-66-1	CC(=O)C1=CCCCC1
390	1-(1h-indol-3-yl)ethanone_c0	000703-80-0	CC(=O)c1c[nH]c2ccccc12
391	1-(1h-pyrrol-2-yl)-ethanone_c0	001072-83-9	CC(=O)c1ccc[nH]1
392	1-(1-hydroxycyclohexyl)ethanone_c0	001123-27-9	CC(=O)C1(O)CCCCC1
393	1-(1-methyl-2-propoxyethoxy)-2-propanol_c0	029911-27-1	CCCOCC(C)OCC(C)O
394	1-(1-methylethenyl)-4-(1-methylethyl)benzene_c0	002388-14-9	C=C(C)c1ccc(C(C)C)cc1
395	1-(1-methylethoxy)-butane_c0	001860-27-1	CCCCOC(C)C
396	1-(1-naphthalenyl)-ethanone_c0	000941-98-0	CC(=O)c1cccc2ccccc12
397	1-(1-piperidinyl)-cyclohexanecarbonitrile_c0	003867-15-0	N#CC1(N2CCCCC2)CCCCC1
398	1-(2,4,5-trimethylphenyl)ethanone_c0	002040-07-5	CC(=O)c1cc(C)c(C)cc1C
399	1-(2,4,6-trimethylphenyl)ethanone_c0	001667-01-2	CC(=O)c1c(C)cc(C)cc1C
400	1-(2,4-dihydroxyphenyl)ethanone_c0	000089-84-9	CC(=O)c1ccc(O)cc1O
401	1-(2,4-dimethylphenyl)ethanone_c0	000089-74-7	CC(=O)c1ccc(C)cc1C
402	1-(2,5-dimethylphenyl)ethanone_c0	002142-73-6	CC(=O)c1cc(C)ccc1C
403	1-(2-benzofuranyl)ethanone_c0	001646-26-0	CC(=O)c1cc2ccccc2o1
404	1-(2-furanyl)-1-propanone_c0	003194-15-8	CCC(=O)c1ccco1
405	1(2h)-isoquinolinone_c0	000491-30-5	O=c1[nH]ccc2ccccc12
406	1-(2-hydroxy-5-methylphenyl)-1-propanone_c0	000938-45-4	CCC(=O)c1cc(C)ccc1O
407	1-(2-hydroxyethyl)-2-pyrrolidinone_c0	003445-11-2	O=C1CCCN1CCO
408	1-(2-hydroxyethyl)imidazole_c0	001615-14-1	OCCn1ccnc1
409	1-(2-hydroxyphenyl)ethanone_c0	000118-93-4	CC(=O)c1ccccc1O
410	1-(2-methyloxiranyl)-ethanone_c0	004587-00-2	CC(=O)C1(C)CO1
411	1-(2-methylphenyl)ethanone_c0	000577-16-2	CC(=O)c1ccccc1C
412	1-(2-propenyl)cyclohexene_c0	013511-13-2	C=CCC1=CCCCC1
413	1-(3,4-dimethylphenyl)ethanone_c0	003637-01-2	CC(=O)c1ccc(C)c(C)c1
414	1-(3,5-dichlorophenoxy)silatrane_c0	090936-47-3	Clc1cc(Cl)cc(O[Si]23OCCN(CCO2)CCO3)c1
415	1-(3,5-dimethylphenoxy)silatrane_c0	090955-56-9	Cc1cc(C)cc(O[Si]23OCCN(CCO2)CCO3)c1
416	1-(3-aminophenoxy)silatrane_c0	090936-52-0	Nc1cccc(O[Si]23OCCN(CCO2)CCO3)c1
417	1-(3-bromophenoxy)silatrane_c0	083801-60-9	Brc1cccc(O[Si]23OCCN(CCO2)CCO3)c1
418	1-(3-chlorophenoxy)silatrane_c0	086825-39-0	Clc1cccc(O[Si]23OCCN(CCO2)CCO3)c1
419	1-(3-furanyl)-4-methyl-1-pentanone_c0	000553-84-4	CC(C)CCC(=O)c1ccoc1
420	1-(3-methylphenoxy)silatrane_c0	071357-27-2	Cc1cccc(O[Si]23OCCN(CCO2)CCO3)c1
421	1-(3-nitrophenyl)-ethanone_c0	000121-89-1	CC(=O)c1cccc([N+](=O)[O-])c1
422	1-(3-pyridinyl)-1,3-butanedione_c0	003594-37-4	CC(=O)CC(=O)c1cccnc1
423	1-(4-aminophenyl)-1-propanone_c0	000070-69-9	CCC(=O)c1ccc(N)cc1
424	1-(4-bromophenoxy)silatrane_c0	086811-82-7	Brc1ccc(O[Si]23OCCN(CCO2)CCO3)cc1
425	1-(4-chlorophenoxy)silatrane_c0	051466-76-3	Clc1ccc(O[Si]23OCCN(CCO2)CCO3)cc1
426	1-(4-chlorophenyl)ethanone_c0	000099-91-2	CC(=O)c1ccc(Cl)cc1
427	1-(4-ethylphenoxy)silatrane_c0	090936-53-1	CCc1ccc(O[Si]23OCCN(CCO2)CCO3)cc1
428	1-(4-ethylphenyl)-2-phenylethane_c0	007439-15-8	CCc1ccc(CCc2ccccc2)cc1
429	1-(4-hydroxy-3-methoxyphenyl)-ethanone_c0	000498-02-2	COc1cc(C(C)=O)ccc1O
430	1-(4-hydroxyphenyl)ethanone_c0	000099-93-4	CC(=O)c1ccc(O)cc1
431	1-(4-methoxyphenyl)-2-propanone_c0	000122-84-9	COc1ccc(CC(C)=O)cc1
432	1-(4-methylphenoxy)silatrane_c0	051466-75-2	Cc1ccc(O[Si]23OCCN(CCO2)CCO3)cc1
433	1-(4-pyridinyl)ethanone_c0	001122-54-9	CC(=O)c1ccncc1
434	1-(acetyloxy)-2-propanone_c0	000592-20-1	CC(=O)COC(C)=O
435	1-(chloromethyl)-2,4-dimethylbenzene_c0	000824-55-5	Cc1ccc(CCl)c(C)c1
436	1-(chloromethyl)-2-methylbenzene_c0	000552-45-4	Cc1ccccc1CCl
437	1-(chloromethyl)-3-methylbenzene_c0	000620-19-9	Cc1cccc(CCl)c1
438	1-(dimethylamino)-2-propanol_c0	000108-16-7	CC(O)CN(C)C
439	1-(ethenyloxy)decane_c0	000765-05-9	C=COCCCCCCCCCC
440	1-(ethenyloxy)propane_c0	000764-47-6	C=COCCC
441	1-(ethenylsulfonyl)-4-methyl-benzene_c0	005535-52-4	C=CS(=O)(=O)c1ccc(C)cc1
442	1-(ethylthio)-2-methylpropane_c0	001613-45-2	CCSCC(C)C
443	1-(ethylthio)-4-methylbenzene_c0	000622-63-9	CCSc1ccc(C)cc1
444	1-(ethylthio)-octane_c0	003698-94-0	CCCCCCCCSCC
445	1-(hydroxymethyl)-5,5-dimethylhydantoin_c0	000116-25-6	CC1(C)C(=O)NC(=O)N1CO
446	1-(mes)-acetaldehydeoxime_c0	013749-94-5	CSC(C)=NO
447	1-(methylamino)anthraquinone_c0	000082-38-2	CNc1cccc2c1C(=O)c1ccccc1C2=O
448	1-(methylthio)butane_c0	000628-29-5	CCCCSC
449	1-(methylthio)-propane_c0	003877-15-4	CCCSC
450	1-(phenylmethyl)-1h-imidazole_c0	004238-71-5	c1ccc(Cn2ccnc2)cc1
451	1-(phenylmethyl)-1h-pyrrole_c0	002051-97-0	c1ccc(Cn2cccc2)cc1
452	1-(sime3)-n-[(sime3)methyl]methanamine_c0	017882-91-6	C[Si](C)(C)CNC[Si](C)(C)C
453	1-(trimethylsilyl)methanamine_c0	018166-02-4	C[Si](C)(C)CN
454	1,1'-(1,1-me-3-meyl-1,3-prdiyl)-bisbenzene_c0	006362-80-7	C=C(CC(C)(C)c1ccccc1)c1ccccc1
455	1,1'-(1,2-ethanediyl)bis(4-ethyl-)benzene_c0	051526-06-8	CCc1ccc(CCc2ccc(CC)cc2)cc1
456	1,1'-(1,2-ethanediyl)bis-benzene_c0	000103-29-7	c1ccc(CCc2ccccc2)cc1
457	1,1'-(1,2-ethynediyl)bisbenzene_c0	000501-65-5	C(#Cc1ccccc1)c1ccccc1
458	1,1'-(1-methyl-1,2-ethylidene)bisbenzene_c0	000779-51-1	CC(=Cc1ccccc1)c1ccccc1
459	1,1'-(1-methyl-1,3-propanediyl)bisbenzene_c0	001520-44-1	CC(CCc1ccccc1)c1ccccc1
460	1,1'-(1-methylethylidene)bisbenzene_c0	000778-22-3	CC(C)(c1ccccc1)c1ccccc1
461	1,1'-(bromomethylene)bisbenzene_c0	000776-74-9	BrC(c1ccccc1)c1ccccc1
462	1,1'-(methylenebis(oxy))bis(2-methyl)propane_c0	002568-91-4	CC(C)COCOCC(C)C
463	1,1',1''-(1-ethanyl-2-ylidene)trisbenzene_c0	001520-42-9	c1ccc(CC(c2ccccc2)c2ccccc2)cc1
464	1,1',1''-(1-ethenyl-2-ylidene)tris-benzene_c0	000058-72-0	C(=C(c1ccccc1)c1ccccc1)c1ccccc1
465	1,1,1,2,2,3,4,5,5,5-decafluoropentane_c0	138495-42-8	FC(C(F)C(F)(F)C(F)(F)F)C(F)(F)F
466	1,1,1,2,2-pentafluoropropane_c0	001814-88-6	CC(F)(F)C(F)(F)F
467	1,1,1,2,3,3,3-heptafluoropropane_c0	000431-89-0	FC(C(F)(F)F)C(F)(F)F
468	1,1,1,2,3,3-hexafluoropropane_c0	000431-63-0	FC(F)C(F)C(F)(F)F
469	1,1,1,2,3,4,4,4-octafluoro-2-butene_c0	000360-89-4	FC(=C(F)C(F)(F)F)C(F)(F)F
470	1,1,1,2-tetrachloroethane_c0	000630-20-6	ClCC(Cl)(Cl)Cl
471	1,1,1,2-tetrafluoroethane_c0	000811-97-2	FCC(F)(F)F
472	1,1,1,2-tetraphenylethane_c0	002294-94-2	c1ccc(CC(c2ccccc2)(c2ccccc2)c2ccccc2)cc1
473	1,1,1,3,3,3-hexafluoro-2,2-propanediol_c0	000677-71-4	OC(O)(C(F)(F)F)C(F)(F)F
474	1,1,1,3,3,3-hexafluoro-2-propanone_c0	000684-16-2	O=C(C(F)(F)F)C(F)(F)F
475	1,1,1,3,3,3-hexafluoropropane_c0	000690-39-1	FC(F)(F)CC(F)(F)F
476	1,1,1,3,3-pentafluoropropane_c0	000460-73-1	FC(F)CC(F)(F)F
477	1,1,1,3,5,7,7,7-octamethyltetrasiloxane_c0	016066-09-4	C[SiH](O[SiH](C)O[Si](C)(C)C)O[Si](C)(C)C
478	1,1,1,4,4,4-hexafluoro-2-butyne_c0	000692-50-2	FC(F)(F)C#CC(F)(F)F
479	1,1,1-ethanetricarbonitrile_c0	010359-20-3	CC(C#N)(C#N)C#N
480	1,1,1-trichloro-2,2,2-trifluoroethane_c0	000354-58-5	FC(F)(F)C(Cl)(Cl)Cl
481	1,1,1-trichloro-2,3-epoxypropane_c0	003083-23-6	ClC(Cl)(Cl)C1CO1
482	1,1,1-trichloro-2-fluoroethane_c0	002366-36-1	FCC(Cl)(Cl)Cl
483	1,1,1-trichloro-2-propanol_c0	000076-00-6	CC(O)C(Cl)(Cl)Cl
484	1,1,1-trichloroacetone_c0	000918-00-3	CC(=O)C(Cl)(Cl)Cl
485	1,1,1-triethoxyethane_c0	000078-39-7	CCOC(C)(OCC)OCC
486	1,1,1-trifluoro-2-bromoethane_c0	000421-06-7	FC(F)(F)CBr
487	1,1,1-trifluoro-2-propanol_c0	000374-01-6	CC(O)C(F)(F)F
488	1,1,1-trifluoro-2-propanone_c0	000421-50-1	CC(=O)C(F)(F)F
489	1,1,1-trifluoro-4-hydroxy-4-(2-th)-3-buten-2-one_c0	015788-02-0	O=C(C=C(O)c1cccs1)C(F)(F)F
490	1,1,1-trifluoro-4-sh-4-(2-thia)-3-buten-2-one_c0	004552-64-1	OC(=CC(=S)c1cccs1)C(F)(F)F
491	1,1,1-trifluoroethane_c0	000420-46-2	CC(F)(F)F
492	1,1,1-trifluoromethylmethylether_c0	000421-14-7	COC(F)(F)F
493	1,1,2,2,3-pentafluoropropane_c0	000679-86-7	FCC(F)(F)C(F)F
494	1,1,2,2-tetrabromoethane_c0	000079-27-6	BrC(Br)C(Br)Br
495	1,1,2,2-tetrachloro-1,2-difluoro-ethane_c0	000076-12-0	FC(Cl)(Cl)C(F)(Cl)Cl
496	1,1,2,2-tetrafluoroethane_c0	000359-35-3	FC(F)C(F)F
497	1,1,2,2-tetrafluoroethylmethylether_c0	000425-88-7	COC(F)(F)C(F)F
498	1,1,2,2-tetraphenylethane_c0	000632-50-8	c1ccc(C(c2ccccc2)C(c2ccccc2)c2ccccc2)cc1
499	1,1,2,2-tetra-t-butylethane_c0	062850-21-9	CC(C)(C)C(C(C(C)(C)C)C(C)(C)C)C(C)(C)C
500	1,1,2,3,3,3-hexafluoro-1-propene_c0	000116-15-4	FC(F)=C(F)C(F)(F)F
501	1,1,2,3,4,4-hexachloro-1,3-butadiene_c0	000087-68-3	ClC(Cl)=C(Cl)C(Cl)=C(Cl)Cl
502	1,1,2-trichloro-1,2,2-trifluoroethane_c0	000076-13-1	FC(F)(Cl)C(F)(Cl)Cl
503	1,1,2-trichloro-2-fluoroethane_c0	000359-28-4	FC(Cl)C(Cl)Cl
504	1,1,2-trichloropropane_c0	000598-77-6	CC(Cl)C(Cl)Cl
505	1,1,2-trifluoro-1,2-diphenylethane_c0	068936-77-6	FC(c1ccccc1)C(F)(F)c1ccccc1
506	1,1,2-trifluoroethane_c0	000430-66-0	FCC(F)F
507	1,1,2-trimethylcyclohexane_c0	007094-26-0	CC1CCCCC1(C)C
508	1,1,2-trimethylcyclopentane_c0	004259-00-1	CC1CCCC1(C)C
509	1,1,2-trimethylcyclopropane_c0	004127-45-1	CC1CC1(C)C
510	1,1,3,3-tetramethoxypropane_c0	000102-52-3	COC(CC(OC)OC)OC
511	1,1,3,3-tetramethyl-1,3-diphenyldisiloxane_c0	000056-33-7	C[Si](C)(O[Si](C)(C)c1ccccc1)c1ccccc1
512	1,1,3,3-tetramethyl-1,3-disiloxanediol_c0	001118-15-6	C[Si](C)(O)O[Si](C)(C)O
513	1,1,3,3-tetramethylcyclopentane_c0	050876-33-0	CC1(C)CCC(C)(C)C1
514	1,1,3,3-tetramethylguanidine_c0	000080-70-6	CN(C)C(=N)N(C)C
515	1,1,3-trichloropropene_c0	002567-14-8	ClCC=C(Cl)Cl
516	1,1,3-trimethoxypropane_c0	014315-97-0	COCCC(OC)OC
517	1,1,3-trimethylcyclohexane_c0	003073-66-3	CC1CCCC(C)(C)C1
518	1,1,3-trimethylcyclopentane_c0	004516-69-2	CC1CCC(C)(C)C1
519	1,1'-[thiobis(methylene)]bisbenzene_c0	000538-74-9	c1ccc(CSCc2ccccc2)cc1
520	1,10-decanediol_c0	000112-47-0	OCCCCCCCCCCO
521	1,10-undecadiyne_c0	004117-15-1	C#CCCCCCCCC#C
522	1,1'-2',1''-terphenyl_c0	000084-15-1	c1ccc(-c2ccccc2-c2ccccc2)cc1
523	1,12-dimethyl-benz[a]anthracene_c0	000313-74-6	Cc1cccc2ccc3cc4ccccc4c(C)c3c12
524	1,1'-4',1''-terphenyl_c0	000092-94-4	c1ccc(-c2ccc(-c3ccccc3)cc2)cc1
525	1,1'-bicyclohexyl-2-one_c0	000090-42-6	O=C1CCCCC1C1CCCCC1
526	1,1'-biphenyl-4-amine_c0	000092-67-1	Nc1ccc(-c2ccccc2)cc1
527	1,1'-butylidenebisbenzene_c0	000719-79-9	CCCC(c1ccccc1)c1ccccc1
528	1,1'-carbonylbis-1h-imidazole_c0	000530-62-1	O=C(n1ccnc1)n1ccnc1
529	1,1-diallylethanol_c0	025201-40-5	C=CCC(C)(O)CC=C
530	1,1-dibromoethane_c0	000557-91-5	CC(Br)Br
531	1,1-dicarboxycyclobutane_c0	005445-51-2	O=C(O)C1(C(=O)O)CCC1
532	1,1-dichloro-1,2,2-trifluoroethane_c0	000812-04-4	FC(F)C(F)(Cl)Cl
533	1,1-dichloro-1-fluoroethane_c0	001717-00-6	CC(F)(Cl)Cl
534	1,1-dichloro-1-nitroethane_c0	000594-72-9	CC(Cl)(Cl)[N+](=O)[O-]
535	1,1-dichloro-1-nitropropane_c0	000595-44-8	CCC(Cl)(Cl)[N+](=O)[O-]
536	1,1-dichloro-2,2,2-trifluoroethane_c0	000306-83-2	FC(F)(F)C(Cl)Cl
537	1,1-dichloro-2,2-difluoroethylene_c0	000079-35-6	FC(F)=C(Cl)Cl
538	1,1-dichloro-2,2-difluoroethylmethylether_c0	000076-38-0	COC(Cl)(Cl)C(F)F
539	1,1-dichloro-2-fluoro-1-propene_c0	000430-95-5	CC(F)=C(Cl)Cl
540	1,1-dichloro-2-methylpropane_c0	000598-76-5	CC(C)C(Cl)Cl
541	1,1-dichloro-3-methylbutane_c0	000625-66-1	CC(C)CC(Cl)Cl
542	1,1-dichloroacetone_c0	000513-88-2	CC(=O)C(Cl)Cl
543	1,1-dichlorobutane_c0	000541-33-3	CCCC(Cl)Cl
544	1,1-dichlorocyclohexane_c0	002108-92-1	ClC1(Cl)CCCCC1
545	1,1-dichloroethylene_c0	000075-35-4	C=C(Cl)Cl
546	1,1-dichloropropane_c0	000078-99-9	CCC(Cl)Cl
547	1,1-dichloropropene_c0	000563-58-6	CC=C(Cl)Cl
548	1,1-dichlorotetrafluoroethane_c0	000374-07-2	FC(F)(F)C(F)(Cl)Cl
549	1,1-diethoxyethane_c0	000105-57-7	CCOC(C)OCC
550	1,1-diethoxy-n,n-dimethylmethanamine_c0	001188-33-6	CCOC(OCC)N(C)C
551	1,1-diethoxypropane_c0	004744-08-5	CCOC(CC)OCC
552	1,1-diethylcyclohexane_c0	000078-01-3	CCC1(CC)CCCCC1
553	1,1-diethylgermacyclohexan-4-one_c0	041992-17-0	CC[Ge]1(CC)CCC(=O)CC1
554	1,1-diethylhydrazine_c0	000616-40-0	CCN(N)CC
555	1,1-difluoro-1,2,2-trichloroethane_c0	000354-21-2	FC(F)(Cl)C(Cl)Cl
556	1,1-difluoro-2-methoxyethane_c0	000461-57-4	COCC(F)F
557	1,1-difluoroethane_c0	000075-37-6	CC(F)F
558	1,1-difluoroethene_c0	000075-38-7	C=C(F)F
559	1,1-dimethoxyethane_c0	000534-15-6	COC(C)OC
560	1,1-dimethylcyclohexane_c0	000590-66-9	CC1(C)CCCCC1
561	1,1-dimethylcyclopentane_c0	001638-26-2	CC1(C)CCCC1
562	1,1-dimethylcyclopropane_c0	001630-94-0	CC1(C)CC1
563	1,1-dimethylethyl-2-propenylperoxide_c0	039972-78-6	C=CCOOC(C)(C)C
564	1,1-dimethylhydrazine_c0	000057-14-7	CN(C)N
565	1,1'-diphenyl-1,1'-bicyclohexyl_c0	059358-71-3	c1ccc(C2(C3(c4ccccc4)CCCCC3)CCCCC2)cc1
566	1,1'-diphenyl-1,1'-bicyclooctyl_c0	059358-73-5	c1ccc(C2(C3(c4ccccc4)CCCCCCC3)CCCCCCC2)cc1
567	1,1'-diphenyl-1,1'-bicyclopentyl_c0	059358-70-2	c1ccc(C2(C3(c4ccccc4)CCCC3)CCCC2)cc1
568	1,1-diphenylethane_c0	000612-00-0	CC(c1ccccc1)c1ccccc1
569	1,1'-dithiobispiperidine_c0	010220-20-9	C1CCN(SSN2CCCCC2)CC1
570	1,1-ethanedioldiacetate_c0	000542-10-9	CC(=O)OC(C)OC(C)=O
571	1,1'-iminobis-2-propanol_c0	000110-97-4	CC(O)CNCC(C)O
572	1,1'-methylenebis(oxy)bisbutane_c0	002568-90-3	CCCCOCOCCCC
573	1,1'-methylenebis(oxy)bispropane_c0	000505-84-0	CCCOCOCCC
574	1,1'-methylenebis4-isocyanatobenzene_c0	000101-68-8	O=C=Nc1ccc(Cc2ccc(N=C=O)cc2)cc1
575	1,1'-oxybis-2-ethoxy-ethane_c0	000112-36-7	CCOCCOCCOCC
576	1,1'-oxybis2-methylpropane_c0	000628-55-7	CC(C)COCC(C)C
577	1,1'-oxybis-octane_c0	000629-82-3	CCCCCCCCOCCCCCCCC
578	1,1'-sulfinylbisbutane_c0	002168-93-6	CCCCS(=O)CCCC
579	1,1'-sulfinylbisethene_c0	001115-15-7	C=CS(=O)C=C
580	1,1'-sulfinylbispropane_c0	004253-91-2	CCCS(=O)CCC
581	1,1'-sulfonylbis(4-methyl-)benzene_c0	000599-66-6	Cc1ccc(S(=O)(=O)c2ccc(C)cc2)cc1
582	1,1'-sulfonylbisbutane_c0	000598-04-9	CCCCS(=O)(=O)CCCC
583	1,1'-thiobis2-methylpropane_c0	000592-65-4	CC(C)CSCC(C)C
584	1,1'-thiobisethene_c0	000627-51-0	C=CSC=C
585	1,1'-thiobis-octane_c0	002690-08-6	CCCCCCCCSCCCCCCCC
586	1,1'-thiobispiperidine_c0	025116-80-7	C1CCN(SN2CCCCC2)CC1
587	1,1'-thiobispropane_c0	000111-47-7	CCCSCCC
588	1,2(h)-phthalazinone_c0	000119-39-1	O=c1[nH]ncc2ccccc12
589	1,2,2,6,6-pentamethylpiperidine_c0	000079-55-0	CN1C(C)(C)CCCC1(C)C
590	1,2,2a,3,4,5-hexahydroacenaphthylene_c0	000480-72-8	c1cc2c3c(c1)CCC3CCC2
591	1,2,2-trichloropropane_c0	003175-23-3	CC(Cl)(Cl)CCl
592	1,2,3,4,5,5-hexachloro-1,3-cyclopentadiene_c0	000077-47-4	ClC1=C(Cl)C(Cl)(Cl)C(Cl)=C1Cl
593	1,2,3,4,5,6,7,8-octahydroanthracene_c0	001079-71-6	c1c2c(cc3c1CCCC3)CCCC2
594	1,2,3,4-dibenzanthracene_c0	000215-58-7	c1ccc2cc3c4ccccc4c4ccccc4c3cc2c1
595	1,2,3,4-tetrachlorobenzene_c0	000634-66-2	Clc1ccc(Cl)c(Cl)c1Cl
596	1,2,3,4-tetrachlorodibenzofuran_c0	024478-72-6	Clc1c(Cl)c(Cl)c2c(oc3ccccc32)c1Cl
597	1,2,3,4-tetrafluorobenzene_c0	000551-62-2	Fc1ccc(F)c(F)c1F
598	1,2,3,4-tetrahydro-1,1-dimethylnaphthalene_c0	001985-59-7	CC1(C)CCCc2ccccc21
599	1,2,3,4-tetrahydro-1,4-dimethylnaphthalene_c0	004175-54-6	CC1CCC(C)c2ccccc21
600	1,2,3,4-tetrahydro-2-methylnaphthalene_c0	003877-19-8	CC1CCc2ccccc2C1
601	1,2,3,4-tetrahydro-2-naphthalenol_c0	000530-91-6	OC1CCc2ccccc2C1
602	1,2,3,4-tetrahydro-5-methylnaphthalene_c0	002809-64-5	Cc1cccc2c1CCCC2
603	1,2,3,4-tetrahydro-6,7-dimethylnaphthalene_c0	001076-61-5	Cc1cc2c(cc1C)CCCC2
604	1,2,3,4-tetrahydro-6-methoxyquinoline_c0	000120-15-0	COc1ccc2c(c1)CCCN2
605	1,2,3,4-tetrahydro-6-methylnaphthalene_c0	001680-51-9	Cc1ccc2c(c1)CCCC2
606	1,2,3,4-tetrahydroquinoline_c0	000635-46-1	c1ccc2c(c1)CCCN2
607	1,2,3,4-tetrahydroquinoxaline_c0	003476-89-9	c1ccc2c(c1)NCCN2
608	1,2,3,4-tetramethylbenzene_c0	000488-23-3	Cc1ccc(C)c(C)c1C
609	1,2,3,4-tetramethylcyclohexane_c0	003726-45-2	CC1CCC(C)C(C)C1C
610	1,2,3,5,6-pentathiepane_c0	000292-46-6	C1SSCSSS1
611	1,2,3,5-tetrachlorobenzene_c0	000634-90-2	Clc1cc(Cl)c(Cl)c(Cl)c1
612	1,2,3,5-tetraethylbenzene_c0	038842-05-6	CCc1cc(CC)c(CC)c(CC)c1
613	1,2,3,5-tetrafluorobenzene_c0	002367-82-0	Fc1cc(F)c(F)c(F)c1
614	1,2,3,5-tetramethylbenzene_c0	000527-53-7	Cc1cc(C)c(C)c(C)c1
615	1,2,3,6-tetrahydro-1-nitrosopyridine_c0	055556-92-8	O=NN1CC=CCC1
616	1,2,3,6-tetrahydrobenzyl-alcohol_c0	001679-51-2	OCC1CC=CCC1
617	1,2,3,6-tetrahydropyridine_c0	000694-05-3	C1=CCNCC1
618	1,2,3-benzotriazin-4(1h)-one_c0	000090-16-4	O=c1[nH]nnc2ccccc12
619	1,2,3-benzoxadiazole_c0	000273-59-6	c1ccc2onnc2c1
620	1,2,3-propanetrioltrinitrate_c0	000055-63-0	O=[N+]([O-])OCC(CO[N+](=O)[O-])O[N+](=O)[O-]
621	1,2,3-thiadiazole_c0	000288-48-2	c1csnn1
622	1,2,3-triaminobenzene_c0	000608-32-2	Nc1cccc(N)c1N
623	1,2,3-trichlorobenzene_c0	000087-61-6	Clc1cccc(Cl)c1Cl
624	1,2,3-trichloropropane_c0	000096-18-4	ClCC(Cl)CCl
625	1,2,3-trichloropropene_c0	000096-19-5	ClC=C(Cl)CCl
626	1,2,3-triethylbenzene_c0	042205-08-3	CCc1cccc(CC)c1CC
627	1,2,3-trihydroxybenzene_c0	000087-66-1	Oc1cccc(O)c1O
628	1,2,3-trihydroxybutane_c0	004435-50-1	CC(O)C(O)CO
629	1,2,3-trimethoxybenzene_c0	000634-36-6	COc1cccc(OC)c1OC
630	1,2,3-trimethyl-1h-indene_c0	004773-83-5	CC1=C(C)C(C)c2ccccc21
631	1,2,3-trimethyl-1h-indole_c0	001971-46-6	Cc1c(C)n(C)c2ccccc12
632	1,2,3-trimethyl-4-ethylbenzene_c0	061827-86-9	CCc1ccc(C)c(C)c1C
633	1,2,3-trimethylbenzene_c0	000526-73-8	Cc1cccc(C)c1C
634	1,2,3-trimethylcyclohexane_c0	001678-97-3	CC1CCCC(C)C1C
635	1,2,4,5-benzenetetracarboxylicacid_c0	000089-05-4	O=C(O)c1cc(C(=O)O)c(C(=O)O)cc1C(=O)O
636	1,2,4,5-benzenetetracarboxylicanhydride_c0	000089-32-7	O=c1oc(=O)c2cc3c(=O)oc(=O)c3cc12
637	1,2,4,5-tetrabromobenzene_c0	000636-28-2	Brc1cc(Br)c(Br)cc1Br
638	1,2,4,5-tetrachlorobenzene_c0	000095-94-3	Clc1cc(Cl)c(Cl)cc1Cl
639	1,2,4,5-tetrafluorobenzene_c0	000327-54-8	Fc1cc(F)c(F)cc1F
640	1,2,4,5-tetraisopropylbenzene_c0	000635-11-0	CC(C)c1cc(C(C)C)c(C(C)C)cc1C(C)C
641	1,2,4,5-tetramethylbenzene_c0	000095-93-2	Cc1cc(C)c(C)cc1C
642	1,2,4-benzenetriamine_c0	000615-71-4	Nc1ccc(N)c(N)c1
643	1,2,4-benzenetricarboxylicacid_c0	000528-44-9	O=C(O)c1ccc(C(=O)O)c(C(=O)O)c1
644	1,2,4-benzenetricarboxylicacidtriheptylester_c0	001528-48-9	CCCCCCCOC(=O)c1ccc(C(=O)OCCCCCCC)c(C(=O)OCCCCCCC)c1
645	1,2,4-benzenetricarboxylicacidtrimethylester_c0	002459-10-1	COC(=O)c1ccc(C(=O)OC)c(C(=O)OC)c1
646	1,2,4-benzenetriol_c0	000533-73-3	Oc1ccc(O)c(O)c1
647	1,2,4-benzotriazine_c0	000254-87-5	c1ccc2nncnc2c1
648	1,2,4-butanetriol_c0	003068-00-6	OCCC(O)CO
649	1,2,4-triazine-3,5(2h,4h)-dione_c0	000461-89-2	O=c1cn[nH]c(=O)[nH]1
650	1,2,4-triazole_c0	000288-88-0	c1nnc[nH]1
651	1,2,4-tribromobenzene_c0	000615-54-3	Brc1ccc(Br)c(Br)c1
652	1,2,4-trichlorobenzene_c0	000120-82-1	Clc1ccc(Cl)c(Cl)c1
653	1,2,4-trichlorodibenzo-p-dioxin_c0	039227-58-2	Clc1cc(Cl)c2c(c1Cl)Oc1ccccc1O2
654	1,2,4-triethylbenzene_c0	000877-44-1	CCc1ccc(CC)c(CC)c1
655	1,2,4-trifluorobenzene_c0	000367-23-7	Fc1ccc(F)c(F)c1
656	1,2,4-trimethyl-3-ethylbenzene_c0	061827-87-0	CCc1c(C)ccc(C)c1C
657	1,2,4-trimethylpiperazine_c0	000120-85-4	CC1CN(C)CCN1C
658	1,2,4-trithiolane_c0	000289-16-7	C1SCSS1
659	1,2,5,6-dibenzofluorene_c0	000207-83-0	c1ccc2cc3c(cc2c1)Cc1c-3ccc2ccccc12
660	1,2,5,6-tetrahydro-1-methylnicotinicacid_c0	000499-04-7	CN1CCC=C(C(=O)O)C1
661	1,2,5-trimethylpyrrole_c0	000930-87-0	Cc1ccc(C)n1C
662	1,2,6,7-cyclodecatetraene_c0	003451-55-6	C1=CCCC=C=CCCC=1
663	1,2,6-hexanetriol_c0	000106-69-4	OCCCCC(O)CO
664	1,2-3,4-diepoxybutane(2r,3r)_c0	030419-67-1	C1OC1C1CO1
665	1,2-4,5-dibenzopyrene_c0	000192-65-4	c1ccc2c(c1)cc1c3ccccc3c3cccc4ccc2c1c43
666	1,2-7,8-dibenzophenanthrene_c0	000213-46-7	c1ccc2c(c1)ccc1c2ccc2c3ccccc3ccc21
667	1,2-benzenediamine_c0	000095-54-5	Nc1ccccc1N
668	1,2-benzenedicarbonitrile_c0	000091-15-6	N#Cc1ccccc1C#N
669	1,2-benzenedicarboxamide_c0	000088-96-0	NC(=O)c1ccccc1C(N)=O
670	1,2-benzenedicarboxylicacid,heptyl,nonylester_c0	019295-81-9	CCCCCCCCCOC(=O)c1ccccc1C(=O)OCCCCCCC
671	1,2-benzenedicarboxylicaciddidecylester_c0	000084-77-5	CCCCCCCCCCOC(=O)c1ccccc1C(=O)OCCCCCCCCCC
672	1,2-benzenedicarboxylicaciddiheptylester_c0	003648-21-3	CCCCCCCOC(=O)c1ccccc1C(=O)OCCCCCCC
673	1,2-benzenedicarboxylicaciddiisononylester_c0	028553-12-0	CC(C)CCCCCCOC(=O)c1ccccc1C(=O)OCCCCCCC(C)C
674	1,2-benzenedicarboxylicaciddinonylester_c0	000084-76-4	CCCCCCCCCOC(=O)c1ccccc1C(=O)OCCCCCCCCC
675	1,2-benzenedicarboxylicaciddioctylester_c0	000117-84-0	CCCCCCCCOC(=O)c1ccccc1C(=O)OCCCCCCCC
676	1,2-benzenedicarboxylicaciddiundecylester_c0	003648-20-2	CCCCCCCCCCCOC(=O)c1ccccc1C(=O)OCCCCCCCCCCC
677	1,2-benzenedicarboxylicacidheptylundecylester_c0	111381-90-9	CCCCCCCCCCCOC(=O)c1ccccc1C(=O)OCCCCCCC
678	1,2-benzenedicarboxylicacidnonylundecylester_c0	111381-91-0	CCCCCCCCCCCOC(=O)c1ccccc1C(=O)OCCCCCCCCC
679	1,2-benzenediol_c0	000120-80-9	Oc1ccccc1O
680	1,2-benzisothiazole_c0	000272-16-2	c1ccc2sncc2c1
681	1,2-benzisoxazole_c0	000271-95-4	c1ccc2oncc2c1
682	1,2-benzopyran_c0	000254-04-6	C1=Cc2ccccc2OC1
683	1,2-bis(1-methylethyl)hydrazine_c0	003711-34-0	CC(C)NNC(C)C
684	1,2-bis(trimethylsilyl)acetylene_c0	014630-40-1	C[Si](C)(C)C#C[Si](C)(C)C
685	1,2-butadiene_c0	000590-19-2	C=C=CC
686	1,2-butanediol_c0	000584-03-2	CCC(O)CO
687	1,2-cyclobutanedione_c0	033689-28-0	O=C1CCC1=O
688	1,2-cycloheptanedione_c0	003008-39-7	O=C1CCCCCC1=O
689	1,2-cyclohexanediamine_c0	000694-83-7	NC1CCCCC1N
690	1,2-cyclohexanedione_c0	000765-87-7	O=C1CCCCC1=O
691	1,2-cyclohexanedionedioxime_c0	000492-99-9	ON=C1CCCCC1=NO
692	1,2-diacetylhydrazine_c0	003148-73-0	CC(=O)NNC(C)=O
693	1,2-diaminoethane_c0	000107-15-3	NCCN
694	1,2-dibromo-1,1,2,2-tetrachloroethane_c0	000630-25-1	ClC(Cl)(Br)C(Cl)(Cl)Br
695	1,2-dibromo-1,1,2,2-tetrafluoroethane_c0	000124-73-2	FC(F)(Br)C(F)(F)Br
696	1,2-dibromododecane_c0	055334-42-4	CCCCCCCCCCC(Br)CBr
697	1,2-dibromopropane_c0	000078-75-1	CC(Br)CBr
698	1,2-dibutoxyethane_c0	000112-48-1	CCCCOCCOCCCC
699	1,2-dichloro-1,1,2-trifluoroethane_c0	000354-23-4	FC(Cl)C(F)(F)Cl
700	1,2-dichloro-1,1-difluoroethane_c0	001649-08-7	FC(F)(Cl)CCl
701	1,2-dichloro-1,2,3,3,4,4-hexafluorocyclobutane_c0	000356-18-3	FC1(F)C(F)(F)C(F)(Cl)C1(F)Cl
702	1,2-dichloro-1,2-difluoroethane_c0	000431-06-1	FC(Cl)C(F)Cl
703	1,2-dichloro-1,2-difluoroethylene_c0	000598-88-9	FC(Cl)=C(F)Cl
704	1,2-dichloro-1-ethoxyethane_c0	000623-46-1	CCOC(Cl)CCl
705	1,2-dichloro-1-fluoroethane_c0	000430-57-9	FC(Cl)CCl
706	1,2-dichloro-2-butene_c0	013602-13-6	CC=C(Cl)CCl
707	1,2-dichloro-2-fluoropropane_c0	000420-97-3	CC(F)(Cl)CCl
708	1,2-dichloro-2-methylpropane_c0	000594-37-6	CC(C)(Cl)CCl
709	1,2-dichloro-3,3,3-trifluoropropene_c0	000431-27-6	FC(F)(F)C(Cl)=CCl
710	1,2-dichloro-3,3,4,4,5,5-hexafluorocyclopentene_c0	000706-79-6	FC1(F)C(Cl)=C(Cl)C(F)(F)C1(F)F
711	1,2-dichloro-4-isocyanatobenzene_c0	000102-36-3	O=C=Nc1ccc(Cl)c(Cl)c1
712	1,2-dichlorobutane_c0	000616-21-7	CCC(Cl)CCl
713	1,2-dichlorohexane_c0	002162-92-7	CCCCC(Cl)CCl
714	1,2-dichloropentane_c0	001674-33-5	CCCC(Cl)CCl
715	1,2-dichloropropane_c0	000078-87-5	CC(Cl)CCl
716	1,2-dichloropropene_c0	000563-54-2	CC(Cl)=CCl
717	1,2-dichlorotetrafluoroethane_c0	000076-14-2	FC(F)(Cl)C(F)(F)Cl
718	1,2-diethoxybenzene_c0	002050-46-6	CCOc1ccccc1OCC
719	1,2-diethylbenzene_c0	000135-01-3	CCc1ccccc1CC
720	1,2-diethylhydrazine_c0	001615-80-1	CCNNCC
721	1,2-difluoroethane_c0	000624-72-6	FCCF
722	1,2-dihydronaphthalene_c0	000447-53-0	C1=Cc2ccccc2CC1
723	1,2-dihydroxy-2-butene_c0	050317-11-8	CC=C(O)CO
724	1,2-dihydroxynaphthalene_c0	000574-00-5	Oc1ccc2ccccc2c1O
725	1,2-diiodoethane_c0	000624-73-7	ICCI
726	1,2-diisopropylbenzene_c0	000577-55-9	CC(C)c1ccccc1C(C)C
727	1,2-dime-1,2-diphenlethyleneglycoldime-ether_c0	041047-48-7	COC(C)(c1ccccc1)C(C)(OC)c1ccccc1
728	1,2-dimethoxy-4-methylbenzene_c0	000494-99-5	COc1ccc(C)cc1OC
729	1,2-dimethoxybenzene_c0	000091-16-7	COc1ccccc1OC
730	1,2-dimethoxyethane_c0	000110-71-4	COCCOC
731	1,2-dimethoxypropane_c0	007778-85-0	COCC(C)OC
732	1,2-dimethyl-1h-imidazole_c0	001739-84-0	Cc1nccn1C
733	1,2-dimethyl-3-nitrobenzene_c0	000083-41-0	Cc1cccc([N+](=O)[O-])c1C
734	1,2-dimethyl-3-propylbenzene_c0	017059-44-8	CCCc1cccc(C)c1C
735	1,2-dimethyl-4-nitrobenzene_c0	000099-51-4	Cc1ccc([N+](=O)[O-])cc1C
736	1,2-dimethyl-5-nitro-1h-imidazole_c0	000551-92-8	Cc1ncc([N+](=O)[O-])n1C
737	1,2-dimethylcyclohexene_c0	001674-10-8	CC1=C(C)CCCC1
738	1,2-dimethyl-cyclopentene_c0	000765-47-9	CC1=C(C)CCC1
739	1,2-dimethylenecyclobutane_c0	014296-80-1	C=C1CCC1=C
740	1,2-dimethylhydrazine_c0	000540-73-8	CNNC
741	1,2-dimethylindole_c0	000875-79-6	Cc1cc2ccccc2n1C
742	1,2-dimethylnaphthalene_c0	000573-98-8	Cc1ccc2ccccc2c1C
743	1,2-diphenoxyethane_c0	000104-66-5	c1ccc(OCCOc2ccccc2)cc1
744	1,2-diphenyl-1,1,2,2-tetrafluoroethane_c0	000425-32-1	FC(F)(c1ccccc1)C(F)(F)c1ccccc1
745	1,2-diphenylethanone_c0	000451-40-1	O=C(Cc1ccccc1)c1ccccc1
746	1,2-divinylcyclobutane_c0	002422-85-7	C=CC1CCC1C=C
747	1,2-epoxy-3-ethoxypropane_c0	004016-11-9	CCOCC1CO1
748	1,2-epoxyhexane_c0	001436-34-6	CCCCC1CO1
749	1,2-epoxypropane_c0	000075-56-9	CC1CO1
750	1,2-ethanedioldiacetate_c0	000111-55-7	CC(=O)OCCOC(C)=O
751	1,2-ethanedioldinitrate_c0	000628-96-6	O=[N+]([O-])OCCO[N+](=O)[O-]
752	1,2-ethanediolmonobenzoate_c0	000094-33-7	O=C(OCCO)c1ccccc1
753	1,2-ethanedithiol_c0	000540-63-6	SCCS
754	1,2-ethanediylbisphosphonicacid_c0	006145-31-9	OP(O)OCCOP(O)O
755	1,2-heptadiene_c0	002384-90-9	C=C=CCCCC
756	1,2-hexadiene_c0	000592-44-9	C=C=CCCC
757	1,2-hexanediol_c0	006920-22-5	CCCCC(O)CO
758	1,2-hydrazinedicarboxaldehyde_c0	000628-36-4	O=CNNC=O
759	1,2-methylenedioxy-4-propenylbenzene_c0	000120-58-1	CC=Cc1ccc2c(c1)OCO2
760	1,2-naphthalenedione_c0	000524-42-5	O=C1C=Cc2ccccc2C1=O
761	1,2-octanediol_c0	001117-86-8	CCCCCCC(O)CO
762	1,2-pentadiene_c0	000591-95-7	C=C=CCC
763	1,2-propadiene-1,3-dione_c0	000504-64-3	O=C=C=C=O
764	1,2-propanediamine_c0	000078-90-0	CC(N)CN
765	1,2-propanediolmonoethylether_c0	052125-53-8	CCOC(O)CC
766	1,2-propanedithiol_c0	000814-67-5	CC(S)CS
767	1,2-propyleneglycoldiacetate_c0	000623-84-7	CC(=O)OCC(C)OC(C)=O
768	1,3,5,7,9-pentaoxecane_c0	016528-92-0	C1OCOCOCOCO1
769	1,3,5,7-cyclooctatetraene_c0	000629-20-9	C1=CC=CC=CC=C1
770	1,3,5,7-tetramethyladamantane_c0	001687-36-1	CC12CC3(C)CC(C)(C1)CC(C)(C2)C3
771	1,3,5,7-tetroxane_c0	000293-30-1	C1OCOCOCO1
772	1,3,5-benzenetricarboxylicacid_c0	000554-95-0	O=C(O)c1cc(C(=O)O)cc(C(=O)O)c1
773	1,3,5-cyclooctatriene_c0	001871-52-9	C1=CC=CCCC=C1
774	1,3,5-hexatriene_c0	002235-12-3	C=CC=CC=C
775	1,3,5-triazine-2,4,6(1h,3h,5h)-trione_c0	000108-80-5	Oc1nc(O)nc(O)n1
776	1,3,5-triazine-2,4,6-triamine_c0	000108-78-1	Nc1nc(N)nc(N)n1
777	1,3,5-tribromobenzene_c0	000626-39-1	Brc1cc(Br)cc(Br)c1
778	1,3,5-trichlorobenzene_c0	000108-70-3	Clc1cc(Cl)cc(Cl)c1
779	1,3,5-triethylbenzene_c0	000102-25-0	CCc1cc(CC)cc(CC)c1
780	1,3,5-trifluorobenzene_c0	000372-38-3	Fc1cc(F)cc(F)c1
781	1,3,5-trihydroxybenzene_c0	000108-73-6	Oc1cc(O)cc(O)c1
782	1,3,5-triisopropylbenzene_c0	000717-74-8	CC(C)c1cc(C(C)C)cc(C(C)C)c1
783	1,3,5-trimethyl-1h-pyrazole_c0	001072-91-9	Cc1cc(C)n(C)n1
784	1,3,5-trimethyl-2,4(1h,3h)-pyrimidinedione_c0	004401-71-2	Cc1cn(C)c(=O)n(C)c1=O
785	1,3,5-trimethyl-2,4,6-trinitrobenzene_c0	000602-96-0	Cc1c([N+](=O)[O-])c(C)c([N+](=O)[O-])c(C)c1[N+](=O)[O-]
786	1,3,5-trimethyl-2-nitrobenzene_c0	000603-71-4	Cc1cc(C)c([N+](=O)[O-])c(C)c1
787	1,3,5-trimethyladamantane_c0	000707-35-7	CC12CC3CC(C)(C1)CC(C)(C3)C2
788	1,3,5-trimethylbenzene_c0	000108-67-8	Cc1cc(C)cc(C)c1
789	1,3,5-trinitrobenzene_c0	000099-35-4	O=[N+]([O-])c1cc([N+](=O)[O-])cc([N+](=O)[O-])c1
790	1,3,5-trioxane_c0	000110-88-3	C1OCOCO1
791	1,3,5-triphenylbenzene_c0	000612-71-5	c1ccc(-c2cc(-c3ccccc3)cc(-c3ccccc3)c2)cc1
792	1,3,5-tri-tert-butylbenzene_c0	001460-02-2	CC(C)(C)c1cc(C(C)(C)C)cc(C(C)(C)C)c1
793	1,3,5-trithiane_c0	000291-21-4	C1SCSCS1
794	1,3,6-trimethyl-2,4(1h,3h)-pyrimidinedione_c0	013509-52-9	Cc1cc(=O)n(C)c(=O)n1C
795	1,3,7-trichlorodibenzo(b,e)(1,4)dioxin_c0	067028-17-5	Clc1ccc2c(c1)Oc1c(Cl)cc(Cl)cc1O2
796	1,3-benzenediamine_c0	000108-45-2	Nc1cccc(N)c1
797	1,3-benzenedicarbonitrile_c0	000626-17-5	N#Cc1cccc(C#N)c1
798	1,3-benzenedicarbonyldichloride_c0	000099-63-8	O=C(Cl)c1cccc(C(=O)Cl)c1
799	1,3-benzenedicarboxaldehyde_c0	000626-19-7	O=Cc1cccc(C=O)c1
800	1,3-benzenedicarboxylicacid_c0	000121-91-5	O=C(O)c1cccc(C(=O)O)c1
801	1,3-benzenedicarboxylicaciddimethylester_c0	001459-93-4	COC(=O)c1cccc(C(=O)OC)c1
802	1,3-benzenedimethanamine_c0	001477-55-0	NCc1cccc(CN)c1
803	1,3-benzenedimethanol_c0	000626-18-6	OCc1cccc(CO)c1
804	1,3-benzodioxole_c0	000274-09-9	c1ccc2c(c1)OCO2
805	1,3-benzodioxole-5-carboxylicacid_c0	000094-53-1	O=C(O)c1ccc2c(c1)OCO2
806	1,3-benzodioxole-5-methanol_c0	000495-76-1	OCc1ccc2c(c1)OCO2
807	1,3-benzodithiole-2-thione_c0	000934-36-1	S=c1sc2ccccc2s1
808	1,3-bis(1-methylethyl)-benzene_c0	000099-62-7	CC(C)c1cccc(C(C)C)c1
809	1,3-bis-(triflouromethyl)-benzene_c0	000402-31-3	FC(F)(F)c1cccc(C(F)(F)F)c1
810	1,3-butadiyne_c0	000460-12-8	C#CC#C
811	1,3-butanediol_c0	000107-88-0	CC(O)CCO
812	1,3-butyleneglycolmethylether_c0	000111-32-0	COCCCCO
813	1,3-butyleneoxide_c0	002167-39-7	CC1CCO1
814	1,3-cycloheptadiene_c0	004054-38-0	C1=CCCCC=C1
815	1,3-cyclohexadiene_c0	000592-57-4	C1=CCCC=C1
816	1,3-cyclohexanedimethanamine_c0	002579-20-6	NCC1CCCC(CN)C1
817	1,3-cyclohexanedione_c0	000504-02-9	O=C1CCCC(=O)C1
818	1,3-diacetylurea_c0	000638-20-0	CC(=O)NC(=O)NC(C)=O
819	1,3-diamino-2,4,6-trinitrobenzene_c0	028930-29-2	Nc1c([N+](=O)[O-])cc([N+](=O)[O-])c(N)c1[N+](=O)[O-]
820	1,3-dibromo-2,2-bis(bromomethyl)propane_c0	003229-00-3	BrCC(CBr)(CBr)CBr
821	1,3-dibromobenzene_c0	000108-36-1	Brc1cccc(Br)c1
822	1,3-dichloro-1,1,2,2,3,3-hexafluoropropane_c0	000662-01-1	FC(F)(Cl)C(F)(F)C(F)(F)Cl
823	1,3-dichloro-2-butene_c0	000926-57-8	CC(Cl)=CCCl
824	1,3-dichloro-2-methyl-2-propanol_c0	000597-32-0	CC(O)(CCl)CCl
825	1,3-dichloro-2-methylpropane_c0	000616-19-3	CC(CCl)CCl
826	1,3-dichloro-2-propanol_c0	000096-23-1	OC(CCl)CCl
827	1,3-dichloro-3-methylbutane_c0	000624-96-4	CC(C)(Cl)CCCl
828	1,3-dichloroacetone_c0	000534-07-6	O=C(CCl)CCl
829	1,3-dichloroallene_c0	083682-32-0	ClC=C=CCl
830	1,3-dichlorobutane_c0	001190-22-3	CC(Cl)CCCl
831	1,3-dichloropropane_c0	000142-28-9	ClCCCCl
832	1,3-dichloropropene_c0	000542-75-6	ClC=CCCl
833	1,3-diethenylbenzene_c0	000108-57-6	C=Cc1cccc(C=C)c1
834	1,3-diethyl-2-thiourea_c0	000105-55-5	CCNC(=S)NCC
835	1,3-diethyl-5-methylbenzene_c0	002050-24-0	CCc1cc(C)cc(CC)c1
836	1,3-diethylbenzene_c0	000141-93-5	CCc1cccc(CC)c1
837	1,3-difluoro-2-propanol_c0	000453-13-4	OC(CF)CF
838	1,3-difluoro-5-nitrobenzene_c0	002265-94-3	O=[N+]([O-])c1cc(F)cc(F)c1
839	1,3-difluoropropane_c0	000462-39-5	FCCCF
840	1,3-dihydro-1-methyl-2h-imidazole-2-thione_c0	000060-56-0	Cn1cc[nH]c1=S
841	1,3-dihydro-2h-inden-2-one_c0	000615-13-4	O=C1Cc2ccccc2C1
842	1,3-dihydro-2h-indol-2-one_c0	000059-48-3	O=C1Cc2ccccc2N1
843	1,3-diisocyanato-2-methylbenzene_c0	000091-08-7	Cc1c(N=C=O)cccc1N=C=O
844	1,3-dimethoxy-2-propanol_c0	000623-69-8	COCC(O)COC
845	1,3-dimethoxy-5-methylbenzene_c0	004179-19-5	COc1cc(C)cc(OC)c1
846	1,3-dimethyl-1h-indole_c0	000875-30-9	Cc1cn(C)c2ccccc12
847	1,3-dimethyl-2,4(1h,3h)-pyrimidinedione_c0	000874-14-6	Cn1ccc(=O)n(C)c1=O
848	1,3-dimethyl-2-cyanoguanidine_c0	031857-31-5	CNC(=NC#N)NC
849	1,3-dimethyl-2-imidazolidinone_c0	000080-73-9	CN1CCN(C)C1=O
850	1,3-dimethyl-2-nitrobenzene_c0	000081-20-9	Cc1cccc(C)c1[N+](=O)[O-]
851	1,3-dimethyl-5-ethyluracil_c0	031703-08-9	CCc1cn(C)c(=O)n(C)c1=O
852	1,3-dimethyladamantane_c0	000702-79-4	CC12CC3CC(C1)CC(C)(C3)C2
853	1,3-dimethylnaphthalene_c0	000575-41-7	Cc1cc(C)c2ccccc2c1
854	1,3-dinitrobenzene_c0	000099-65-0	O=[N+]([O-])c1cccc([N+](=O)[O-])c1
855	1,3-dioxane_c0	000505-22-6	C1COCOC1
856	1,3-dioxolan-2-one_c0	000096-49-1	O=C1OCCO1
857	1,3-diphenyl-1,3-propanedione_c0	000120-46-7	O=C(CC(=O)c1ccccc1)c1ccccc1
858	1,3-diphenyl-1-triazene_c0	000136-35-6	c1ccc(N=NNc2ccccc2)cc1
859	1,3-diphenyl-2-propanone_c0	000102-04-5	O=C(Cc1ccccc1)Cc1ccccc1
860	1,3-diphenylisobenzofuran_c0	005471-63-6	c1ccc(-c2oc(-c3ccccc3)c3ccccc23)cc1
861	1,3-di-tert-butyl-glycerin_c0	079808-30-3	CC(C)(C)OCC(O)COC(C)(C)C
862	1,3-dithiane_c0	000505-23-7	C1CSCSC1
863	1,3-dithiane-2-thione_c0	001748-15-8	S=C1SCCCS1
864	1,3-dithiol-2-one_c0	002314-40-1	O=c1sccs1
865	1,3-dithiolan-2-one_c0	002080-58-2	O=C1SCCS1
866	1,3-dithiolane_c0	004829-04-3	C1CSCS1
867	1,3-dithiolane-2-thione_c0	000822-38-8	S=C1SCCS1
868	1,3-dithiole-2-thione_c0	000930-35-8	S=c1sccs1
869	1,3-divinyl-1,1,3,3-tetramethyldisiloxane_c0	002627-95-4	C=C[Si](C)(C)O[Si](C)(C)C=C
870	1,3-hexadien-5-yne_c0	010420-90-3	C#CC=CC=C
871	1,3-indandione_c0	000606-23-5	O=C1CC(=O)c2ccccc21
872	1,3-naphthalenediol_c0	000132-86-5	Oc1cc(O)c2ccccc2c1
873	1,3-phenylenedibenzoate_c0	000094-01-9	O=C(Oc1cccc(OC(=O)c2ccccc2)c1)c1ccccc1
874	1,3-propanediamine_c0	000109-76-2	NCCCN
875	1,3-propanediol,2-(hydroxymethyl)-2-methyl_c0	000077-85-0	CC(CO)(CO)CO
876	1,3-propanediol_c0	000504-63-2	OCCCO
877	1,3-propanedioldiacetate_c0	000628-66-0	CC(=O)OCCCOC(C)=O
878	1,3-propanedithiol_c0	000109-80-8	SCCCS
879	1,4,5,8-tetrahydroxy-9,10-anthracenedione_c0	000081-60-7	O=C1c2c(O)ccc(O)c2C(=O)c2c(O)ccc(O)c21
880	1,4,5,8-tetramethylnaphthalene_c0	002717-39-7	Cc1ccc(C)c2c(C)ccc(C)c12
881	1,4,5-trimethylnaphthalene_c0	002131-41-1	Cc1ccc(C)c2c(C)cccc12
882	1,4,7,10-tetraoxacyclododecane_c0	000294-93-9	C1COCCOCCOCCO1
883	1,4,8,11-tetraazacyclotetradecane_c0	000295-37-4	C1CNCCNCCCNCCNC1
884	1,4,9,10-anthracenetetrone_c0	001709-63-3	O=c1ccc(=O)c2c(=O)c3ccccc3c(=O)c1=2
885	1,4-benzenediamine_c0	000106-50-3	Nc1ccc(N)cc1
886	1,4-benzenedicarbacid-bis(2,3-di-pr-oh)ester_c0	066032-51-7	O=C(OCC(O)CO)c1ccc(C(=O)OCC(O)CO)cc1
887	1,4-benzenedicarbonitrile_c0	000623-26-7	N#Cc1ccc(C#N)cc1
888	1,4-benzenedicarboxaldehyde_c0	000623-27-8	O=Cc1ccc(C=O)cc1
889	1,4-benzenedicarboxylicacid_c0	000100-21-0	O=C(O)c1ccc(C(=O)O)cc1
890	1,4-benzenedicarboxylicaciddimethylester_c0	000120-61-6	COC(=O)c1ccc(C(=O)OC)cc1
891	1,4-benzenedimethanol_c0	000589-29-7	OCc1ccc(CO)cc1
892	1,4-bis(1,1-dimethylethyl)-benzene_c0	001012-72-2	CC(C)(C)c1ccc(C(C)(C)C)cc1
893	1,4-bis(1-methylethyl)-benzene_c0	000100-18-5	CC(C)c1ccc(C(C)C)cc1
894	1,4-bis(2-hydroxyethyl)piperazine_c0	000122-96-3	OCCN1CCN(CCO)CC1
895	1,4-bis(5-phenyloxazol-2-yl)benzene_c0	001806-34-4	c1ccc(-c2cnc(-c3ccc(-c4ncc(-c5ccccc5)o4)cc3)o2)cc1
896	1,4-bis(diphenylphosphino)butane_c0	007688-25-7	c1ccc(P(CCCCP(c2ccccc2)c2ccccc2)c2ccccc2)cc1
897	1,4-butadiol_c0	000110-63-4	OCCCCO
898	1,4-butanediamine_c0	000110-60-1	NCCCCN
899	1,4-butanediisocyanate_c0	004538-37-8	O=C=NCCCCN=C=O
900	1,4-butanedithiol_c0	001191-08-8	SCCCCS
901	1,4-cineol_c0	000470-67-7	CC(C)C12CCC(C)(CC1)O2
902	1,4-cyclohexadiene_c0	000628-41-1	C1=CCC=CC1
903	1,4-cyclohexanedicarboxylicaciddimethylester_c0	000094-60-0	COC(=O)C1CCC(C(=O)OC)CC1
904	1,4-cyclohexanedimethanol_c0	000105-08-8	OCC1CCC(CO)CC1
905	1,4-cyclohexanedione_c0	000637-88-7	O=C1CCC(=O)CC1
906	1,4-cyclooctadiene_c0	001073-07-0	C1=CCCCC=CC1
907	1,4-diamino-9,10-anthracenedione_c0	000128-95-0	Nc1ccc(N)c2c1C(=O)c1ccccc1C2=O
908	1,4-dibrombenzene_c0	000106-37-6	Brc1ccc(Br)cc1
909	1,4-dichloro-2,3-butanediol_c0	002419-73-0	OC(CCl)C(O)CCl
910	1,4-dichloro-2-butene_c0	000764-41-0	ClCC=CCCl
911	1,4-dichloro-2-butyne_c0	000821-10-3	ClCC#CCCl
912	1,4-dichloro-2-methylbutane_c0	000623-34-7	CC(CCl)CCCl
913	1,4-dichlorobenzene_c0	000106-46-7	Clc1ccc(Cl)cc1
914	1,4-dichlorobutane_c0	000110-56-5	ClCCCCCl
915	1,4-dichloropentane_c0	000626-92-6	CC(Cl)CCCCl
916	1,4-diethoxybenzene_c0	000122-95-2	CCOc1ccc(OCC)cc1
917	1,4-diethylbenzene_c0	000105-05-5	CCc1ccc(CC)cc1
918	1,4-difluoro-2-nitrobenzene_c0	000364-74-9	O=[N+]([O-])c1cc(F)ccc1F
919	1,4-dihydronaphthalene_c0	000612-17-9	C1=CCc2ccccc2C1
920	1,4-dihydroxy-9,10-anthracenedione_c0	000081-64-1	O=C1c2ccccc2C(=O)c2c(O)ccc(O)c21
921	1,4-diiodobenzene_c0	000624-38-4	Ic1ccc(I)cc1
922	1,4-dimethyl-2,3-diaza-bicyclo(2-2-2)oct-2-ene_c0	049570-30-1	CC12CCC(C)(CC1)N=N2
923	1,4-dimethyl-2,6,7-trioxabicyclo(2-2-2)octane_c0	027761-61-1	CC12COC(C)(OC1)OC2
924	1,4-dimethyl-2-nitrobenzene_c0	000089-58-7	Cc1ccc(C)c([N+](=O)[O-])c1
925	1,4-dimethylcyclopentene_c0	019550-48-2	CC1=CCC(C)C1
926	1,4-dimethylnaphthalene_c0	000571-58-4	Cc1ccc(C)c2ccccc12
927	1,4-dinitrosopiperazine_c0	000140-79-4	O=NN1CCN(N=O)CC1
928	1,4-dioxane-2,5-dione_c0	000502-97-6	O=C1COC(=O)CO1
929	1,4-diphenyl-(e,e)-1,3-butadiene_c0	000538-81-8	C(C=Cc1ccccc1)=Cc1ccccc1
930	1,4-dithiane_c0	000505-29-3	C1CSCCS1
931	1,4-dithiothreitol_c0	003483-12-3	OC(CS)C(O)CS
932	1,4-hexadiene_c0	000592-45-0	C=CCC=CC
933	1,4-naphthalenediamine_c0	002243-61-0	Nc1ccc(N)c2ccccc12
934	1,4-naphthalenediol_c0	000571-60-8	Oc1ccc(O)c2ccccc12
935	1,4-naphthalenedione_c0	000130-15-4	O=C1C=CC(=O)c2ccccc21
936	1,4-oxathiane_c0	015980-15-1	C1CSCCO1
937	1,4-pentadien-3-ol_c0	000922-65-6	C=CC(O)C=C
938	1,4-pentadiene_c0	000591-93-5	C=CCC=C
939	1,4-pentanediol_c0	000626-95-9	CC(O)CCCO
940	1,5-cyclooctadiene_c0	000111-78-4	C1=CCCC=CCC1
941	1,5-diaminonaphthalene_c0	002243-62-1	Nc1cccc2c(N)cccc12
942	1,5-dichlorohexamethyltrisiloxane_c0	003582-71-6	C[Si](C)(Cl)O[Si](C)(C)O[Si](C)(C)Cl
943	1,5-dichloro-pentane_c0	000628-76-2	ClCCCCCCl
944	1,5-dihydroxy-9,10-anthracenedione_c0	000117-12-4	O=C1c2cccc(O)c2C(=O)c2cccc(O)c21
945	1,5-dihydroxynaphthalene_c0	000083-56-7	Oc1cccc2c(O)cccc12
946	1,5-diisocyanatonaphthalene_c0	003173-72-6	O=C=Nc1cccc2c(N=C=O)cccc12
947	1,5-dimethylcyclopentene_c0	016491-15-9	CC1=CCCC1C
948	1,5-dimethylnaphthalene_c0	000571-61-9	Cc1cccc2c(C)cccc12
949	1,5-dimethyl-pyrrolidin-2-one_c0	005075-92-3	CC1CCC(=O)N1C
950	1,5-diphenyl-1h-tetrazole_c0	007477-73-8	c1ccc(-c2nnnn2-c2ccccc2)cc1
951	1,5-hexadien-3-ol_c0	000924-41-4	C=CCC(O)C=C
952	1,5-hexadien-3-yne_c0	000821-08-9	C=CC#CC=C
953	1,5-hexadiene_c0	000592-42-7	C=CCCC=C
954	1,5-hexadiyne_c0	000628-16-0	C#CCCC#C
955	1,5-hexanediol_c0	000928-40-5	CC(O)CCCCO
956	1,5-naphthyridine_c0	000254-79-5	c1cnc2cccnc2c1
957	1,5-pentanediamine_c0	000462-94-2	NCCCCCN
958	1,5-pentanediol_c0	000111-29-5	OCCCCCO
959	1,6-dichlorohexane_c0	002163-00-0	ClCCCCCCCl
960	1,6-diisocyanatohexane_c0	000822-06-0	O=C=NCCCCCCN=C=O
961	1,6-dimethylnaphthalene_c0	000575-43-9	Cc1ccc2c(C)cccc2c1
962	1,6-heptadien-4-ol_c0	002883-45-6	C=CCC(O)CC=C
963	1,6-heptadiene_c0	003070-53-9	C=CCCCC=C
964	1,6-heptadiyne_c0	002396-63-6	C#CCCCC#C
965	1,6-hexanediamine_c0	000124-09-4	NCCCCCCN
966	1,6-hexanediol_c0	000629-11-8	OCCCCCCO
967	1,6-hexanediol-diacrylate_c0	013048-33-4	C=CC(=O)OCCCCCCOC(=O)C=C
968	1,6-naphthalenediol_c0	000575-44-0	Oc1ccc2c(O)cccc2c1
969	1,7-dimethylnaphthalene_c0	000575-37-1	Cc1ccc2cccc(C)c2c1
970	1,7-heptanediamine_c0	000646-19-5	NCCCCCCCN
971	1,7-heptanediol_c0	000629-30-1	OCCCCCCCO
972	1,7-octadiyne_c0	000871-84-1	C#CCCCCC#C
973	1,8-cineole_c0	000470-82-6	CC12CCC(CC1)C(C)(C)O2
974	1,8-cyclotetradecadiyne_c0	001540-80-3	C1#CCCCCCC#CCCCCC1
975	1,8-dimethylnaphthalene_c0	000569-41-5	Cc1cccc2cccc(C)c12
976	1,8-naphthalenediamine_c0	000479-27-6	Nc1cccc2cccc(N)c12
977	1,8-nonadiene_c0	004900-30-5	C=CCCCCCC=C
978	1,8-nonadiyne_c0	002396-65-8	C#CCCCCCC#C
979	1,8-octanediamine_c0	000373-44-4	NCCCCCCCCN
980	1,8-octanediol_c0	000629-41-4	OCCCCCCCCO
981	1,8-paracyclophane_c0	006169-94-4	c1cc2ccc1CCCCCCCCc1ccc(cc1)C2
982	1,9-decadiene_c0	001647-16-1	C=CCCCCCCC=C
983	11h-benzo(a)fluorene_c0	000238-84-6	c1ccc2c(c1)Cc1c-2ccc2ccccc12
984	11-oxabicyclo(4-4-1)undeca-1,3,5,7,9-pentaene_c0	004759-11-9	C1=CC=C2C=CC=CC(=C1)O2
985	124-benzthiadiz-1-o2-3-me-6-cf3_c0	000723-57-9	CC1=Nc2cc(C(F)(F)F)ccc2S(=O)(=O)N1
986	12h-benzo[c]phenothiazine_c0	000225-83-2	c1ccc2c(c1)Nc1c(ccc3ccccc13)S2
987	13h-dibenzo(a,i)carbazole_c0	000239-64-5	c1ccc2c(c1)ccc1c3ccc4ccccc4c3[nH]c21
988	1-4-dinitropiperazine_c0	004164-37-8	O=[N+]([O-])N1CCN([N+](=O)[O-])CC1
989	14h-dibenzo[a,j]phenothiazine_c0	000224-62-4	c1ccc2c3c(ccc2c1)Sc1ccc2ccccc2c1N3
990	15-crown-5-ether_c0	033100-27-5	C1COCCOCCOCCOCCO1
991	1-5-dimethyluracil_c0	004160-72-9	Cc1cn(C)c(=O)[nH]c1=O
992	15-methyloxacyclopentadecan-2-one_c0	032539-85-8	CC1CCCCCCCCCCCCC(=O)O1
993	17betaestradiol3tbutyldimethylsilyloxy_c0	057441-02-8	C=C1CCC2C(CCC3(C)C(O)CCC23)C1=CC=CO[Si](C)(C)C(C)(C)C
994	18-crown-6-ether_c0	017455-13-9	C1COCCOCCOCCOCCOCCO1
995	1-9-nonanediol_c0	003937-56-2	OCCCCCCCCCO
996	1a,2a,4a-1,2,4-trimethylcyclopentane_c0	002613-72-1	CC1CC(C)C(C)C1
997	1a,2b,4a-1,2,4-trimethylcyclohexane_c0	007667-60-9	CC1CCC(C)C(C)C1
998	1a,3a,5b-trimethylcyclohexane_c0	001795-26-2	CC1CC(C)CC(C)C1
999	1-acetylpiperidine_c0	000618-42-8	CC(=O)N1CCCCC1
1000	1-adamantanecarboxamide_c0	005511-18-2	NC(=O)C12CC3CC(CC(C3)C1)C2
1001	1-adamantanol_c0	000768-95-6	OC12CC3CC(CC(C3)C1)C2
1002	1-adamantylmethylketone_c0	001660-04-4	CC(=O)C12CC3CC(CC(C3)C1)C2
1003	1-amino-2,4,6-cycloheptatrien-1-one_c0	033504-43-7	Nc1cccccc1=O
1004	1-amino-2-propanol_c0	000078-96-6	CC(O)CN
1005	1-amino-4-hydroxy-9,10-anthracenedione_c0	000116-85-8	Nc1ccc(O)c2c1C(=O)c1ccccc1C2=O
1006	1-amino-9,10-anthracenedione_c0	000082-45-1	Nc1cccc2c1C(=O)c1ccccc1C2=O
1007	1-amino-cyclopentanecarboxylicacid_c0	000052-52-8	[NH3+]C1(C(=O)[O-])CCCC1
1008	1-aminocyclopropanecarboxylicacid_c0	022059-21-8	NC1(C(=O)O)CC1
1009	1-aminopiperidine_c0	002213-43-6	NN1CCCCC1
1010	1-azido-4-nitrobenzene_c0	001516-60-5	[N-]=[N+]=Nc1ccc([N+](=O)[O-])cc1
1011	1-aziridineethanol_c0	001072-52-2	OCCN1CC1
1012	1-benzoylpiperidine_c0	000776-75-0	O=C(c1ccccc1)N1CCCCC1
1013	1-bromo-1,2,2,2-tetrafluoroethane_c0	000124-72-1	FC(Br)C(F)(F)F
1014	1-bromo-1,2-difluoroethylene_c0	000358-99-6	FC=C(F)Br
1015	1-bromo-1-chloroethane_c0	000593-96-4	CC(Cl)Br
1016	1-bromo-2,2-dimethylpropane_c0	000630-17-1	CC(C)(C)CBr
1017	1-bromo-2-chloroethane_c0	000107-04-0	ClCCBr
1018	1-bromo-2-chloroethene_c0	003018-09-5	ClC=CBr
1019	1-bromo-2-chloropropane_c0	003017-96-7	CC(Cl)CBr
1020	1-bromo-2-ethoxyethane_c0	000592-55-2	CCOCCBr
1021	1-bromo-2-fluoroethane_c0	000762-49-2	FCCBr
1022	1-bromo-2-nitrobenzene_c0	000577-19-5	O=[N+]([O-])c1cccc(Br)c1
1023	1-bromo-2-propanone_c0	000598-31-2	CC(=O)CBr
1024	1-bromo-3-fluoropropane_c0	000352-91-0	FCCCBr
1025	1-bromo-3-methylbutane_c0	000107-82-4	CC(C)CCBr
1026	1-bromo-4-chlorobenzene_c0	000106-39-8	Clc1ccc(Br)cc1
1027	1-bromo-4-methylbenzene_c0	000106-38-7	Cc1ccc(Br)cc1
1028	1-bromo-4-methylpentane_c0	000626-88-0	CC(C)CCCBr
1029	1-bromododecane_c0	000143-15-7	CCCCCCCCCCCCBr
1030	1-bromoheptane_c0	000629-04-9	CCCCCCCBr
1031	1-bromohexane_c0	000111-25-1	CCCCCCBr
1032	1-bromo-isobutane_c0	000534-00-9	CCC(C)CBr
1033	1-bromonaphthalene_c0	000090-11-9	Brc1cccc2ccccc12
1034	1-bromo-n-tridecane_c0	000765-09-3	CCCCCCCCCCCCCBr
1035	1-bromooctane_c0	000111-83-1	CCCCCCCCBr
1036	1-bromopentane_c0	000110-53-2	CCCCCBr
1037	1-butanol-3-methylpropanoate_c0	000105-68-0	CCC(=O)OCCC(C)C
1038	1-buten-1-one(ethylketene)_c0	020334-52-5	CCC=C=O
1039	1-buten-3-one_c0	000078-94-4	C=CC(C)=O
1040	1-butene_c0	025167-67-3	C=CCC
1041	1-butoxy-2-propanol_c0	005131-66-8	CCCCOCC(C)O
1042	1-butyl-1h-pyrrole_c0	000589-33-3	CCCCn1cccc1
1043	1-butylaziridine_c0	001120-85-0	CCCCN1CC1
1044	1-butylbenzotriazole_c0	000708-43-0	CCCCn1nnc2ccccc21
1045	1-butyldihydroxyborane_c0	004426-47-5	CCCCB(O)O
1046	1-chloro-(e)-2-butene_c0	004894-61-5	CC=CCCl
1047	1-chloro-1,1,2,2-tetrafluoroethane_c0	000354-25-6	FC(F)C(F)(F)Cl
1048	1-chloro-1,1,2-trifluoroethane_c0	000431-07-2	FC(F)C(F)Cl
1049	1-chloro-1,1-difluoroethane_c0	000075-68-3	CC(F)(F)Cl
1050	1-chloro-1,2,2,2-tetrafluoroethane_c0	002837-89-0	FC(Cl)C(F)(F)F
1051	1-chloro-1,2-butadiene_c0	000627-23-6	CC=C=CCl
1052	1-chloro-1,2-difluoroethane_c0	025497-29-4	FC(F)CCl
1053	1-chloro-1-butene_c0	004461-42-1	CCC=CCl
1054	1-chloro-1-butyne_c0	062981-74-2	CCC#CCl
1055	1-chloro-1-ethoxyethane_c0	007081-78-9	CCOC(C)Cl
1056	1-chloro-1-fluoroethane_c0	001615-75-4	CC(F)Cl
1057	1-chloro-1-nitroethane_c0	000598-92-5	CC(Cl)[N+](=O)[O-]
1058	1-chloro-1-nitropropane_c0	000600-25-9	CCC(Cl)[N+](=O)[O-]
1059	1-chloro-1-pentene_c0	021450-13-5	CCCC=CCl
1060	1-chloro-1-propene_c0	000590-21-6	CC=CCl
1061	1-chloro-2-(1-methylethyl)benzene_c0	002077-13-6	CC(C)c1ccccc1Cl
1062	1-chloro-2-(chloromethyl)benzene_c0	000611-19-8	ClCc1ccccc1Cl
1063	1-chloro-2,2,2-trifluoroethyldifluoromethylether_c0	026675-46-7	FC(F)OC(Cl)C(F)(F)F
1064	1-chloro-2,2-difluoroethene_c0	000359-10-4	FC(F)=CCl
1065	1-chloro-2,2-difluoropropane_c0	000420-99-5	CC(F)(F)CCl
1066	1-chloro-2,2-dimethylpropane_c0	000753-89-9	CC(C)(C)CCl
1067	1-chloro-2,4-dimethylbenzene_c0	000095-66-9	Cc1ccc(Cl)c(C)c1
1068	1-chloro-2,4-dinitrobenzene_c0	000097-00-7	O=[N+]([O-])c1ccc(Cl)c([N+](=O)[O-])c1
1069	1-chloro-2-butanol_c0	001873-25-2	CCC(O)CCl
1070	1-chloro-2-butanone_c0	000616-27-3	CCC(=O)CCl
1071	1-chloro-2-ethoxybenzene_c0	000614-72-2	CCOc1ccccc1Cl
1072	1-chloro-2-ethylbenzene_c0	000089-96-3	CCc1ccccc1Cl
1073	1-chloro-2-fluoroethane_c0	000762-50-5	FCCCl
1074	1-chloro-2-isocyanatobenzene_c0	003320-83-0	O=C=Nc1ccccc1Cl
1075	1-chloro-2-methyl-1-butene_c0	023378-11-2	CCC(C)=CCl
1076	1-chloro-2-methyl-1-propene_c0	000513-37-1	CC(C)=CCl
1077	1-chloro-2-methyl-2-butene_c0	013417-43-1	CC=C(C)CCl
1078	1-chloro-2-methyl-2-propanol_c0	000558-42-9	CC(C)(O)CCl
1079	1-chloro-2-methylbenzene_c0	000095-49-8	Cc1ccccc1Cl
1080	1-chloro-2-methyl-propane_c0	000513-36-0	CC(C)CCl
1081	1-chloro-2-nitro-4-(trifluoromethyl)-benzene_c0	000121-17-5	O=[N+]([O-])c1cc(C(F)(F)F)ccc1Cl
1082	1-chloro-2-nitrobenzene_c0	000088-73-3	O=[N+]([O-])c1ccccc1Cl
1083	1-chloro-2-nitroethane_c0	000625-47-8	O=[N+]([O-])CCCl
1084	1-chloro-2-nitro-propane_c0	002425-66-3	CC(CCl)[N+](=O)[O-]
1085	1-chloro-2-propanol_c0	000127-00-4	CC(O)CCl
1086	1-chloro-3-(chloromethyl)benzene_c0	000620-20-2	ClCc1cccc(Cl)c1
1087	1-chloro-3,3-dimethylbutane_c0	002855-08-5	CC(C)(C)CCCl
1088	1-chloro-3-bromopropane_c0	000109-70-6	ClCCCBr
1089	1-chloro-3-ethoxybenzene_c0	002655-83-6	CCOc1cccc(Cl)c1
1090	1-chloro-3-ethylbenzene_c0	000620-16-6	CCc1cccc(Cl)c1
1091	1-chloro-3-fluoro-2-methylbenzene_c0	000443-83-4	Cc1c(F)cccc1Cl
1092	1-chloro-3-fluoropropane_c0	000462-38-4	FCCCCl
1093	1-chloro-3-methoxy-propane_c0	036215-07-3	COCCCCl
1094	1-chloro-3-methyl-1-butene_c0	023010-00-6	CC(C)C=CCl
1095	1-chloro-3-methyl-2-butene_c0	000503-60-6	CC(C)=CCCl
1096	1-chloro-3-nitrobenzene_c0	000121-73-3	O=[N+]([O-])c1cccc(Cl)c1
1097	1-chloro-4-(1-methylethyl)benzene_c0	002621-46-7	CC(C)c1ccc(Cl)cc1
1098	1-chloro-4-(chloromethyl)benzene_c0	000104-83-6	ClCc1ccc(Cl)cc1
1099	1-chloro-4-(trifluoromethyl)-benzene_c0	000098-56-6	FC(F)(F)c1ccc(Cl)cc1
1100	1-chloro-4-ethoxybenzene_c0	000622-61-7	CCOc1ccc(Cl)cc1
1101	1-chloro-4-ethylbenzene_c0	000622-98-0	CCc1ccc(Cl)cc1
1102	1-chloro-4-fluorobenzene_c0	000352-33-0	Fc1ccc(Cl)cc1
1103	1-chloro-4-fluorobutane_c0	000462-73-7	FCCCCCl
1104	1-chloro-4-iodobenzene_c0	000637-87-6	Clc1ccc(I)cc1
1105	1-chloro-4-isocyanatobenzene_c0	000104-12-1	O=C=Nc1ccc(Cl)cc1
1106	1-chloro-4-methylbenzene_c0	000106-43-4	Cc1ccc(Cl)cc1
1107	1-chloro-4-nitro-2-(trifluoromethyl)benzene_c0	000777-37-7	O=[N+]([O-])c1ccc(Cl)c(C(F)(F)F)c1
1108	1-chloro-4-nitrobenzene_c0	000100-00-5	O=[N+]([O-])c1ccc(Cl)cc1
1109	1-chlorocyclohexene_c0	000930-66-5	ClC1=CCCCC1
1110	1-chlorodibenzo-p-dioxin_c0	039227-53-7	Clc1cccc2c1Oc1ccccc1O2
1111	1-chloroheptane_c0	000629-06-1	CCCCCCCCl
1112	1-chloronaphthalene_c0	000090-13-1	Clc1cccc2ccccc12
1113	1-chlorononane_c0	002473-01-0	CCCCCCCCCCl
1114	1-chlorooctane_c0	000111-85-3	CCCCCCCCCl
1115	1-chloroprene_c0	000627-22-5	C=CC=CCl
1116	1-chloropropyne_c0	007747-84-4	CC#CCl
1117	1-cis-2-trans-3-trimethylcyclopentane_c0	015890-40-1	CC1CCC(C)C1C
1118	1-cyanoadamantane_c0	023074-42-2	N#CC12CC3CC(CC(C3)C1)C2
1119	1-cyclohexenylcarboxylicacid_c0	000636-82-8	O=C(O)C1=CCCCC1
1120	1-cyclopentylethanone_c0	006004-60-0	CC(=O)C1CCCC1
1121	1-cyclopropylethanone_c0	000765-43-5	CC(=O)C1CC1
1122	1-decanamine_c0	002016-57-1	CCCCCCCCCCN
1123	1-decanethiol_c0	000143-10-2	CCCCCCCCCCS
1124	1-decanol_c0	000112-30-1	CCCCCCCCCCO
1125	1-decene_c0	000872-05-9	C=CCCCCCCCC
1126	1-decyne_c0	000764-93-2	C#CCCCCCCCC
1127	1-docosanol_c0	000661-19-8	CCCCCCCCCCCCCCCCCCCCCCO
1128	1-docosene_c0	001599-67-3	C=CCCCCCCCCCCCCCCCCCCCC
1129	1-dodecanamine_c0	000124-22-1	CCCCCCCCCCCCN
1130	1-dodecanethiol_c0	000112-55-0	CCCCCCCCCCCCS
1131	1-dodecene_c0	000112-41-4	C=CCCCCCCCCCC
1132	1-dodecyne_c0	000765-03-7	C#CCCCCCCCCCC
1133	1-eicosanol_c0	000629-96-9	CCCCCCCCCCCCCCCCCCCCO
1134	1-eicosene_c0	003452-07-1	C=CCCCCCCCCCCCCCCCCCC
1135	1-eicosyne_c0	000765-27-5	C#CCCCCCCCCCCCCCCCCCC
1136	1-ethenyl-2-methoxybenzene_c0	000612-15-7	C=Cc1ccccc1OC
1137	1-ethenyl-4-(2-methylpropyl)-benzene_c0	063444-56-4	C=Cc1ccc(CC(C)C)cc1
1138	1-ethoxy-2-fluorobenzene_c0	000451-80-9	CCOc1ccccc1F
1139	1-ethoxy-2-methylbenzene_c0	000614-71-1	CCOc1ccccc1C
1140	1-ethoxy-2-methylpropane_c0	000627-02-1	CCOCC(C)C
1141	1-ethoxy-2-propanol_c0	001569-02-4	CCOCC(C)O
1142	1-ethoxy-2-propanol-acetate_c0	054839-24-6	CCOCC(C)OC(C)=O
1143	1-ethoxy-3-methylbenzene_c0	000621-32-9	CCOc1cccc(C)c1
1144	1-ethoxy-4-fluorobenzene_c0	000459-26-7	CCOc1ccc(F)cc1
1145	1-ethoxy-4-methylbenzene_c0	000622-60-6	CCOc1ccc(C)cc1
1146	1-ethoxybutane_c0	000628-81-9	CCCCOCC
1147	1-ethoxyheptane_c0	001969-43-3	CCCCCCCOCC
1148	1-ethoxy-hexane_c0	005756-43-4	CCCCCCOCC
1149	1-ethyl-1h-imidazole_c0	007098-07-9	CCn1ccnc1
1150	1-ethyl-1h-pyrrole_c0	000617-92-5	CCn1cccc1
1151	1-ethyl-1-methylcyclohexane_c0	004926-90-3	CCC1(C)CCCCC1
1152	1-ethyl-1-methylcyclopentane_c0	016747-50-5	CCC1(C)CCCC1
1153	1-ethyl-1-methylcyclopropane_c0	053778-43-1	CCC1(C)CC1
1154	1-ethyl-1-phenylhydrazine_c0	000644-21-3	CCN(N)c1ccccc1
1155	1-ethyl-2,3-dimethylbenzene_c0	000933-98-2	CCc1cccc(C)c1C
1156	1-ethyl-2,4,5-trimethylbenzene_c0	017851-27-3	CCc1cc(C)c(C)cc1C
1157	1-ethyl-2,4-dimethylbenzene_c0	000874-41-9	CCc1ccc(C)cc1C
1158	1-ethyl-2,5-pyrrolidinedione_c0	002314-78-5	CCN1C(=O)CCC1=O
1159	1-ethyl-2-isopropylbenzene_c0	018970-44-0	CCc1ccccc1C(C)C
1160	1-ethyl-3,5-dimethylbenzene_c0	000934-74-7	CCc1cc(C)cc(C)c1
1161	1-ethyl-3-piperidinol_c0	013444-24-1	CCN1CCCC(O)C1
1162	1-ethyl-4-(1-methylethyl)benzene_c0	004218-48-8	CCc1ccc(C(C)C)cc1
1163	1-ethyl-4-methoxybenzene_c0	001515-95-3	CCc1ccc(OC)cc1
1164	1-ethyl-4-methylbenzene_c0	000622-96-8	CCc1ccc(C)cc1
1165	1-ethyl-5-methylfuran_c0	001703-52-2	CCc1ccc(C)o1
1166	1-ethylcyclohexanol_c0	001940-18-7	CCC1(O)CCCCC1
1167	1-ethylcyclohexene_c0	001453-24-3	CCC1=CCCCC1
1168	1-ethylcyclopentene_c0	002146-38-5	CCC1=CCCC1
1169	1-ethylhydroxyurea_c0	007433-42-3	CCN(O)C(N)=O
1170	1-ethylnaphthalene_c0	001127-76-0	CCc1cccc2ccccc12
1171	1-ethylpiperidine_c0	000766-09-6	CCN1CCCCC1
1172	1-ethylpyrrolidine_c0	007335-06-0	CCN1CCCC1
1173	1-ethyltetralin_c0	013556-58-6	CCC1CCCc2ccccc21
1174	1-ethynylcyclohexanol_c0	000078-27-3	C#CC1(O)CCCCC1
1175	1-ethynylcyclopentanol_c0	017356-19-3	C#CC1(O)CCCC1
1176	1-fluoro-2-trifluoromethylbenzene_c0	000392-85-8	Fc1ccccc1C(F)(F)F
1177	1-fluoro-3-isothiocyanatobenzene_c0	000404-72-8	Fc1cccc(N=C=S)c1
1178	1-fluoro-4-(trifluoromethyl)benzene_c0	000402-44-8	Fc1ccc(C(F)(F)F)cc1
1179	1-fluorobutane_c0	002366-52-1	CCCCF
1180	1-fluorodecane_c0	000334-56-5	CCCCCCCCCCF
1181	1-fluoroheptane_c0	000661-11-0	CCCCCCCF
1182	1-fluorohexane_c0	000373-14-8	CCCCCCF
1183	1-fluoronaphthalene_c0	000321-38-0	Fc1cccc2ccccc12
1184	1-fluorononane_c0	000463-18-3	CCCCCCCCCF
1185	1-fluorooctane_c0	000463-11-6	CCCCCCCCF
1186	1-fluoropentane_c0	000592-50-7	CCCCCF
1187	1-fluoropropane_c0	000460-13-9	CCCF
1188	1h,8h-hexadecafluorooctane_c0	000307-99-3	FC(F)C(F)(F)C(F)(F)C(F)(F)C(F)(F)C(F)(F)C(F)(F)C(F)F
1189	1h-1,2,3-triazole_c0	000288-36-8	c1c[nH]nn1
1190	1h-1,2,3-triazolo[4,5-d]pyrimidine_c0	000273-40-5	c1ncc2[nH]nnc2n1
1191	1h-2-benzopyran-1-one_c0	000491-31-6	O=c1occc2ccccc12
1192	1h-benzimidazole_c0	000051-17-2	c1ccc2[nH]cnc2c1
1193	1h-benzotriazole_c0	000095-14-7	c1ccc2[nH]nnc2c1
1194	1h-cyclopropa[b]naphthalene_c0	000286-85-1	c1ccc2cc3c(cc2c1)C3
1195	1-heptadecanol_c0	001454-85-9	CCCCCCCCCCCCCCCCCO
1196	1-heptadecene_c0	006765-39-5	C=CCCCCCCCCCCCCCCC
1197	1-heptanamine_c0	000111-68-2	CCCCCCCN
1198	1-heptanethiol_c0	001639-09-4	CCCCCCCS
1199	1-hepten-3-yne_c0	002384-73-8	C=CC#CCCC
1200	1-hepten-4-ol_c0	003521-91-3	C=CCC(O)CCC
1201	1-heptene_c0	000592-76-7	C=CCCCCC
1202	1-heptyne_c0	000628-71-7	C#CCCCCC
1203	1-hexacosene_c0	018835-33-1	C=CCCCCCCCCCCCCCCCCCCCCCCCC
1204	1-hexadecanol_c0	036653-82-4	CCCCCCCCCCCCCCCCO
1205	1-hexadecene_c0	000629-73-2	C=CCCCCCCCCCCCCCC
1206	1-hexanethiol_c0	000111-31-9	CCCCCCS
1207	1-hexen-3-ol_c0	004798-44-1	C=CC(O)CCC
1208	1-hexen-3-yne_c0	013721-54-5	C=CC#CCC
1209	1-hexyl-1,2,3,4-tetrahydronaphthalene_c0	066325-11-9	CCCCCCC1CCCc2ccccc21
1210	1-hexyn-3-ol_c0	000105-31-7	C#CC(O)CCC
1211	1-hexyn-5-one_c0	002550-28-9	C#CCCC(C)=O
1212	1h-imidazo(4,5-b)pyridine_c0	000273-21-2	c1cnc2nc[nH]c2c1
1213	1h-imidazole-4,5-dicarboxylicacid_c0	000570-22-9	O=C(O)c1nc[nH]c1C(=O)O
1214	1h-indazol-5-amine_c0	019335-11-6	Nc1ccc2[nH]ncc2c1
1215	1h-indene_c0	000095-13-6	C1=Cc2ccccc2C1
1216	1h-indole-2,3-dione_c0	000091-56-5	O=C1Nc2ccccc2C1=O
1217	1h-indole-3-carboxaldehyde_c0	000487-89-8	O=Cc1c[nH]c2ccccc12
1218	1h-isoindole-1,3(2h)-dione,4-amino-_c0	002518-24-3	Nc1cccc2c1C(=O)NC2=O
1219	1h-perfluorooctane_c0	000335-65-9	FC(F)C(F)(F)C(F)(F)C(F)(F)C(F)(F)C(F)(F)C(F)(F)C(F)(F)F
1220	1h-purine-2,6-diamine_c0	001904-98-9	Nc1nc(N)c2nc[nH]c2n1
1221	1h-pyrazolo[3,4-d]pyrimidine_c0	000271-80-7	c1ncc2cn[nH]c2n1
1222	1h-pyrrole-2-carboxamide_c0	004551-72-8	NC(=O)c1ccc[nH]1
1223	1h-pyrrole-2-carboxylicacid_c0	000634-97-9	O=C(O)c1ccc[nH]1
1224	1h-tetrazol-1-amine_c0	005378-49-4	Nc1nnn[nH]1
1225	1h-tetrazole_c0	000288-94-8	c1nnn[nH]1
1226	1-hydroxy-2-2-6-6-tetramethyl-4-piperidinol_c0	003637-10-3	CC1(C)CC(O)CC(C)(C)N1O
1227	1-hydroxy-2-butanone_c0	005077-67-8	CCC(=O)CO
1228	1-hydroxy-2-propanone_c0	000116-09-6	CC(=O)CO
1229	1-hydroxyanthraquinone_c0	000129-43-1	O=C1c2ccccc2C(=O)c2c(O)cccc21
1230	1-hydroxycyclohexanecarbonitrile_c0	000931-97-5	N#CC1(O)CCCCC1
1231	1-hydroxyethylidene-1,1-diphosphonicacid_c0	002809-21-4	CC(O)(P(=O)(O)O)P(=O)(O)O
1232	1-indanol_c0	006351-10-6	OC1CCc2ccccc21
1233	1-iodo-3-nitrobenzene_c0	000645-00-1	O=[N+]([O-])c1cccc(I)c1
1234	1-iodo-hexane_c0	000638-45-9	CCCCCCI
1235	1-isocyanato-2-nitrobenzene_c0	003320-86-3	O=C=Nc1ccccc1[N+](=O)[O-]
1236	1-isocyanato-3-nitrobenzene_c0	003320-87-4	O=C=Nc1cccc([N+](=O)[O-])c1
1237	1-isocyanato-4-nitrobenzene_c0	000100-28-7	O=C=Nc1ccc([N+](=O)[O-])cc1
1238	1-isocyanatobutane_c0	000111-36-4	CCCCN=C=O
1239	1-isopropoxy-2-propanol_c0	003944-36-3	CC(O)COC(C)C
1240	1-isopropyl-4-methylcyclohexane_c0	000099-82-1	CC1CCC(C(C)C)CC1
1241	1-isoquinolinamine_c0	001532-84-9	Nc1nccc2ccccc12
1242	1-isothiocyanato-4-methoxybenzene_c0	002284-20-0	COc1ccc(N=C=S)cc1
1243	1-me-1-nitroso-3-(p-fph)urea_c0	000777-59-3	CN(N=O)C(=O)Nc1ccc(F)cc1
1244	1-methoxy-1,3-butadiene_c0	003036-66-6	C=CC=COC
1245	1-methoxy-2-acetoxypropane_c0	000108-65-6	COCC(C)OC(C)=O
1246	1-methoxy-2-methylbenzene_c0	000578-58-5	COc1ccccc1C
1247	1-methoxy-2-methyl-butane_c0	062016-48-2	CCC(C)COC
1248	1-methoxy-2-nitrobenzene_c0	000091-23-6	COc1ccccc1[N+](=O)[O-]
1249	1-methoxy-2-propanamine_c0	037143-54-7	COCC(C)N
1250	1-methoxy2-propanol_c0	000107-98-2	COCC(C)O
1251	1-methoxy-2-propanone_c0	005878-19-3	COCC(C)=O
1252	1-methoxy-3-methylbutane_c0	000626-91-5	COCCC(C)C
1253	1-methoxy-4-(1-propenyl)-benzene_c0	000104-46-1	CC=Cc1ccc(OC)cc1
1254	1-methoxy-4-(2-propenyl)benzene_c0	000140-67-0	C=CCc1ccc(OC)cc1
1255	1-methoxy-4-propylbenzene_c0	000104-45-0	CCCc1ccc(OC)cc1
1256	1-methoxy-9,10-anthracenedione_c0	000082-39-3	COc1cccc2c1C(=O)c1ccccc1C2=O
1257	1-methoxynaphthalene_c0	002216-69-5	COc1cccc2ccccc12
1258	1-methoxy-pentane_c0	000628-80-8	CCCCCOC
1259	1-methyl-1h-indole_c0	000603-76-9	Cn1ccc2ccccc21
1260	1-methyl-1h-pyrrole_c0	000096-54-8	Cn1cccc1
1261	1-methyl-1h-tetrazole_c0	016681-77-9	Cn1cnnn1
1262	1-methyl-1-phenylhydrazine_c0	000618-40-6	CN(N)c1ccccc1
1263	1-methyl-2(1h)-pyridinone_c0	000694-85-9	Cn1ccccc1=O
1264	1-methyl-2-(2-propenyl)benzene_c0	001587-04-8	C=CCc1ccccc1C
1265	1-methyl-2-(3-pyridyl)pyrrole_c0	000487-19-4	Cn1cccc1-c1cccnc1
1266	1-methyl-2(h)-quinolinone_c0	000606-43-9	Cn1c(=O)ccc2ccccc21
1267	1-methyl-2-(phenylmethyl)benzene_c0	000713-36-0	Cc1ccccc1Cc1ccccc1
1268	1-methyl-2,4-dinitrobenzene_c0	000121-14-2	Cc1ccc([N+](=O)[O-])cc1[N+](=O)[O-]
1269	1-methyl-2,5-pyrrolidinedione_c0	001121-07-9	CN1C(=O)CCC1=O
1270	1-methyl-2-ethylbenzene_c0	000611-14-3	CCc1ccccc1C
1271	1-methyl-2-isopropylbenzene_c0	000527-84-4	Cc1ccccc1C(C)C
1272	1-methyl-2-piperidinethione_c0	013070-07-0	CN1CCCCC1=S
1273	1-methyl-2-propylbenzene_c0	001074-17-5	CCCc1ccccc1C
1274	1-methyl-2-propylcyclohexane_c0	004291-79-6	CCCC1CCCCC1C
1275	1-methyl-3-(1-methylethyl)-benzene_c0	000535-77-3	Cc1cccc(C(C)C)c1
1276	1-methyl-3-(methylethoxy)benzene_c0	019177-04-9	Cc1cccc(OC(C)C)c1
1277	1-methyl-3-ethenylbenzene_c0	001124-20-5	C=C(C)c1cccc(C)c1
1278	1-methyl-3-ethylcyclopentane_c0	003726-47-4	CCC1CCC(C)C1
1279	1-methyl-3-piperidinemethanol_c0	007583-53-1	CN1CCCC(CO)C1
1280	1-methyl-3-propyl-benzene_c0	001074-43-7	CCCc1cccc(C)c1
1281	1-methyl-3-propylcyclohexane_c0	004291-80-9	CCCC1CCCC(C)C1
1282	1-methyl-4(1h)-pyridinethione_c0	006887-59-8	Cn1ccc(=S)cc1
1283	1-methyl-4(1h)-pyridinone_c0	000695-19-2	Cn1ccc(=O)cc1
1284	1-methyl-4(1h)-quinolinone_c0	000083-54-5	Cn1ccc(=O)c2ccccc21
1285	1-methyl-4-(1-methylethenyl)benzene_c0	001195-32-0	C=C(C)c1ccc(C)cc1
1286	1-methyl-4-(1-methylethenyl)-cyclohexanol_c0	000138-87-4	C=C(C)C1CCC(C)(O)CC1
1287	1-methyl-4-(1-methylethenylsulfonyl)benzene_c0	067605-02-1	C=C(C)S(=O)(=O)c1ccc(C)cc1
1288	1-methyl-4-(1-methylethyl)-1,3-cyclohexadiene_c0	000099-86-5	CC1=CC=C(C(C)C)CC1
1289	1-methyl-4-(1-methylethyl)-1,4-cyclohexadiene_c0	000099-85-4	CC1=CCC(C(C)C)=CC1
1290	1-methyl-4-(1-propynylsulfonyl)benzene_c0	014027-53-3	CC#CS(=O)(=O)c1ccc(C)cc1
1291	1-methyl-4-(2-methyl-1-propenylsulfonyl)-benzene_c0	016192-03-3	CC(C)=CS(=O)(=O)c1ccc(C)cc1
1292	1-methyl-4-(2-propynyl-sulfonyl)benzene_c0	016192-07-7	C#CCS(=O)(=O)c1ccc(C)cc1
1293	1-methyl-4-(methylsulfonyl)-benzene_c0	003185-99-7	Cc1ccc(S(C)(=O)=O)cc1
1294	1-methyl-4-isopropylbenzene_c0	000099-87-6	Cc1ccc(C(C)C)cc1
1295	1-methyl-4-methylenecyclohexane_c0	002808-80-2	C=C1CCC(C)CC1
1296	1-methyl-4-nitro-benzene_c0	000099-99-0	Cc1ccc([N+](=O)[O-])cc1
1297	1-methyl-4-piperidinol_c0	000106-52-5	CN1CCC(O)CC1
1298	1-methyl-4-propylbenzene_c0	001074-55-1	CCCc1ccc(C)cc1
1299	1-methyl-4-vinylcyclohexene_c0	017699-86-4	C=CC1CC=C(C)CC1
1300	1-methyl-5-aminotetrazole_c0	005422-44-6	Cn1nnnc1N
1301	1-methyl-5-fluorouracil_c0	000155-16-8	Cn1cc(F)c(=O)[nH]c1=O
1302	1-methyladamantane_c0	000768-91-2	CC12CC3CC(CC(C3)C1)C2
1303	1-methylaziridine_c0	001072-44-2	CN1CC1
1304	1-methylcycloheptene_c0	001453-25-4	CC1=CCCCCC1
1305	1-methylcyclohexanol_c0	000590-67-0	CC1(O)CCCCC1
1306	1-methylcyclohexene_c0	000591-49-1	CC1=CCCCC1
1307	1-methyl-cyclopentanamine_c0	040571-45-7	CC1(N)CCCC1
1308	1-methylcyclopentanol_c0	001462-03-9	CC1(O)CCCC1
1309	1-methylcyclopentene_c0	000693-89-0	CC1=CCCC1
1310	1-methyldiadamantane_c0	026460-76-4	CC12CC3CC4C5CC(CC41)CC2C5C3
1311	1-methylhydroxyurea_c0	007433-43-4	CN(O)C(N)=O
1312	1-methylimidazol_c0	000616-47-7	Cn1ccnc1
1313	1-methylindene_c0	000767-59-9	CC1C=Cc2ccccc21
1314	1-methylisoquinoline_c0	001721-93-3	Cc1nccc2ccccc12
1315	1-methylnaphthalene_c0	000090-12-0	Cc1cccc2ccccc12
1316	1-methylpiperazine_c0	000109-01-3	CN1CCNCC1
1317	1-methylpyrazole_c0	000930-36-9	Cn1cccn1
1318	1-methyl-pyrrolidine_c0	000120-94-5	CN1CCCC1
1319	1-methyl-tetralin_c0	001559-81-5	CC1CCCc2ccccc21
1320	1-methyluracil_c0	000615-77-0	Cn1ccc(=O)[nH]c1=O
1321	1-monobutyrin_c0	000557-25-5	CCCC(=O)OCC(O)CO
1322	1-naphthalenecarbonitrile_c0	000086-53-3	N#Cc1cccc2ccccc12
1323	1-naphthalenecarboxaldehyde_c0	000066-77-3	O=Cc1cccc2ccccc12
1324	1-naphthalenecarboxylicacid_c0	000086-55-5	O=C(O)c1cccc2ccccc12
1325	1-naphthalenemethanol_c0	001592-38-7	OCc1ccc2ccccc2c1
1326	1-naphthalenethiol_c0	000529-36-2	Sc1cccc2ccccc12
1327	1-naphthol_c0	000090-15-3	Oc1cccc2ccccc12
1328	1-naphthylhydrazine_c0	002243-55-2	NNc1cccc2ccccc12
1329	1-napthylamine_c0	000134-32-7	Nc1cccc2ccccc12
1330	1-n-butylnaphthalene_c0	001634-09-9	CCCCc1cccc2ccccc12
1331	1-n-decylnaphthalene_c0	026438-27-7	CCCCCCCCCCc1cccc2ccccc12
1332	1-n-hexylnaphthalene_c0	002876-53-1	CCCCCCc1cccc2ccccc12
1333	1-nitro-2-cyanobenzene_c0	000612-24-8	N#Cc1ccccc1[N+](=O)[O-]
1334	1-nitro-2-nitrosobenzene_c0	000612-29-3	O=Nc1ccccc1[N+](=O)[O-]
1335	1-nitro-3-(trifluoromethyl)-benzene_c0	000098-46-4	O=[N+]([O-])c1cccc(C(F)(F)F)c1
1336	1-nitro-3-nitrosobenzene_c0	017122-21-3	O=Nc1cccc([N+](=O)[O-])c1
1337	1-nitro-4-cyanobenzene_c0	000619-72-7	N#Cc1ccc([N+](=O)[O-])cc1
1338	1-nitroanthraquinone_c0	000082-34-8	O=C1c2ccccc2C(=O)c2c1cccc2[N+](=O)[O-]
1339	1-nitrobutane_c0	000627-05-4	CCCC[N+](=O)[O-]
1340	1-nitroheptane_c0	000693-39-0	CCCCCCC[N+](=O)[O-]
1341	1-nitrohexane_c0	000646-14-0	CCCCCC[N+](=O)[O-]
1342	1-nitro-naphthalene_c0	000086-57-7	O=[N+]([O-])c1cccc2ccccc12
1343	1-nitropentane_c0	000628-05-7	CCCCC[N+](=O)[O-]
1344	1-nitroso-2-naphthalenol_c0	000131-91-9	O=C1C=Cc2ccccc2C1=NO
1345	1-nitrotricyclo(3-3-1-1(3,7))decane_c0	007575-82-8	O=[N+]([O-])C12CC3CC(CC(C3)C1)C2
1346	1-n-nonylnaphthalene_c0	026438-26-6	CCCCCCCCCc1cccc2ccccc12
1347	1-nonadecanol_c0	001454-84-8	CCCCCCCCCCCCCCCCCCCO
1348	1-nonadecene_c0	018435-45-5	C=CCCCCCCCCCCCCCCCCC
1349	1-nonanamine_c0	000112-20-9	CCCCCCCCCN
1350	1-nonanethiol_c0	001455-21-6	CCCCCCCCCS
1351	1-nonene_c0	000124-11-8	C=CCCCCCCC
1352	1-nonyne_c0	003452-09-3	C#CCCCCCCC
1353	1-norbornylisocyanide_c0	103434-09-9	N#CC12CCC(CC1)C2
1354	1-n-propylnaphthalene_c0	002765-18-6	CCCc1cccc2ccccc12
1355	1-octacosene_c0	018835-34-2	C=CCCCCCCCCCCCCCCCCCCCCCCCCCC
1356	1-octadecene_c0	000112-88-9	C=CCCCCCCCCCCCCCCCC
1357	1-octanamine_c0	000111-86-4	CCCCCCCCN
1358	1-octanethiol_c0	000111-88-6	CCCCCCCCS
1359	1-pentadecanol_c0	000629-76-5	CCCCCCCCCCCCCCCO
1360	1-pentadecene_c0	013360-61-7	C=CCCCCCCCCCCCCC
1361	1-pentadecyne_c0	000765-13-9	C#CCCCCCCCCCCCCC
1362	1-pentanethiol_c0	000110-66-7	CCCCCS
1363	1-penten-3-ol_c0	000616-25-1	C=CC(O)CC
1364	1-penten-3-one_c0	001629-58-9	C=CC(=O)CC
1365	1-penten-3-yne_c0	000646-05-9	C=CC#CC
1366	1-penten-4-yne_c0	000871-28-3	C#CCC=C
1367	1-pentenylbenzene_c0	000826-18-6	CCCC=Cc1ccccc1
1368	1-pentol_c0	000105-29-3	C#CC(C)=CCO
1369	1-pentylcyclopentene_c0	004291-98-9	CCCCCC1=CCCC1
1370	1-pentylnaphthalene_c0	000086-89-5	CCCCCc1cccc2ccccc12
1371	1-pentylnitrate_c0	001002-16-0	CCCCCO[N+](=O)[O-]
1372	1-pentyn-3-ol_c0	004187-86-4	C#CC(O)CC
1373	1-ph-3,5-dime-4-nitrosopyrazole_c0	000715-99-1	Cc1nn(-c2ccccc2)c(C)c1N=O
1374	1-phenoxy-2-propanol_c0	000770-35-4	CC(O)COc1ccccc1
1375	1-phenoxy-2-propanone_c0	000621-87-4	CC(=O)COc1ccccc1
1376	1-phenoxy-3-(phenylamino)-2-propanol_c0	016112-55-3	OC(CNc1ccccc1)COc1ccccc1
1377	1-phenoxysilatrane_c0	051466-74-1	c1ccc(O[Si]23OCCN(CCO2)CCO3)cc1
1378	1-phenyl-1,2-ethanediol_c0	000093-56-1	OCC(O)c1ccccc1
1379	1-phenyl-1,2-propanedione_c0	000579-07-7	CC(=O)C(=O)c1ccccc1
1380	1-phenyl-1,3-butanedione_c0	000093-91-4	CC(=O)CC(=O)c1ccccc1
1381	1-phenyl-1-butanone_c0	000495-40-9	CCCC(=O)c1ccccc1
1382	1-phenyl-1-ethylmethanoate_c0	007775-38-4	CC(OC=O)c1ccccc1
1383	1-phenyl-1h-indene_c0	001961-96-2	C1=CC(c2ccccc2)c2ccccc21
1384	1-phenyl-1h-tetrazole_c0	005378-52-9	c1ccc(-n2cnnn2)cc1
1385	1-phenyl-1-pentanone_c0	001009-14-9	CCCCC(=O)c1ccccc1
1386	1-phenyl-1-penten-3-one_c0	003152-68-9	CCC(=O)C=Cc1ccccc1
1387	1-phenyl-2-butanone_c0	001007-32-5	CCC(=O)Cc1ccccc1
1388	1-phenyl-2-buten-1-one_c0	000495-41-0	CC=CC(=O)c1ccccc1
1389	1-phenyl-2-propanone_c0	000103-79-7	CC(=O)Cc1ccccc1
1390	1-phenyl-2-propyn-1-ol_c0	004187-87-5	C#CC(O)c1ccccc1
1391	1-phenyl-3-pyrazolidinone_c0	000092-43-3	O=C1CCN(c2ccccc2)N1
1392	1-phenylcyclohexene_c0	000771-98-2	C1=C(c2ccccc2)CCCC1
1393	1-phenylethanoneoxime_c0	000613-91-2	CC(=NO)c1ccccc1
1394	1-phenylethylamine_c0	000098-84-0	CC(N)c1ccccc1
1395	1-phenylethylhydroperoxide_c0	003071-32-7	CC(OO)c1ccccc1
1396	1-phenylnaphthalene_c0	000605-02-7	c1ccc(-c2cccc3ccccc23)cc1
1397	1-phenylpiperazine_c0	000092-54-6	c1ccc(N2CCNCC2)cc1
1398	1-phenylpyrrole_c0	000635-90-5	c1ccc(-n2cccc2)cc1
1399	1-piperazinecarboxylicacidethylester_c0	000120-43-4	CCOC(=O)N1CCNCC1
1400	1-piperazineethanamine_c0	000140-31-8	NCCN1CCNCC1
1401	1-piperazineethanol_c0	000103-76-4	OCCN1CCNCC1
1402	1-piperidineacetonitrile_c0	003010-03-5	N#CCN1CCCCC1
1403	1-piperidinecarboxaldehyde_c0	002591-86-8	O=CN1CCCCC1
1404	1-piperidineethanol_c0	003040-44-6	OCCN1CCCCC1
1405	1-piperidinepropanenitrile_c0	003088-41-3	N#CCCN1CCCCC1
1406	1-propen-1-one(methylketene)_c0	006004-44-0	CC=C=O
1407	1-propoxy-2-propanol_c0	001569-01-3	CCCOCC(C)O
1408	1-propoxybutane_c0	003073-92-5	CCCCOCCC
1409	1-propynylbenzene_c0	000673-32-5	CC#Cc1ccccc1
1410	1-pyrrolidineethanamine_c0	007154-73-6	NCCN1CCCC1
1411	1-tert-butoxy-2-[2-(hydroxy)propoxy]propane_c0	058797-58-3	CC(O)COC(C)COC(C)(C)C
1412	1-tert-butoxy-2-[2-(tert-butoxy)propoxy]propane_c0	058797-59-4	CC(COC(C)(C)C)OCC(C)OC(C)(C)C
1413	1-tetracontene_c0	061868-18-6	C=CCCCCCCCCCCCCCCCCCCCCCCCCCCCCCCCCCCCCCC
1414	1-tetracosene_c0	010192-32-2	C=CCCCCCCCCCCCCCCCCCCCCCC
1415	1-tetradecanamine_c0	002016-42-4	CCCCCCCCCCCCCCN
1416	1-tetradecanol_c0	000112-72-1	CCCCCCCCCCCCCCO
1417	1-tetradecene_c0	001120-36-1	C=CCCCCCCCCCCCC
1418	1-triacontene_c0	018435-53-5	C=CCCCCCCCCCCCCCCCCCCCCCCCCCCCC
1419	1-tridecanol_c0	000112-70-9	CCCCCCCCCCCCCO
1420	1-tridecene_c0	002437-56-1	C=CCCCCCCCCCCC
1421	1-undecanethiol_c0	005332-52-5	CCCCCCCCCCCS
1422	1-undecanol_c0	000112-42-5	CCCCCCCCCCCO
1423	1-undecene_c0	000821-95-4	C=CCCCCCCCCC
1424	1-undecyne_c0	002243-98-3	C#CCCCCCCCCC
1425	1-vinyl-2-pyrrolidinone_c0	000088-12-0	C=CN1CCCC1=O
1426	1-vinyl-4-methoxybenzene_c0	000637-69-4	C=Cc1ccc(OC)cc1
1427	1-vinylcyclohexene_c0	002622-21-1	C=CC1=CCCCC1
1428	2-(1,1-dimethylethyl)-4-methylphenol_c0	002409-55-4	Cc1ccc(O)c(C(C)(C)C)c1
1429	2-(1,1-dimethylethyl)-5-methylphenol_c0	000088-60-8	Cc1ccc(C(C)(C)C)c(O)c1
1430	2-(1,1-dimethylethyl)-6-methylphenol_c0	002219-82-1	Cc1cccc(C(C)(C)C)c1O
1431	2(1h)-pyridinethione_c0	002637-34-5	S=c1cccc[nH]1
1432	2(1h)-pyridinone_c0	072762-00-6	O=c1cccc[nH]1
1433	2(1h)-pyridinonehydrazone_c0	004930-98-7	NNc1ccccn1
1434	2(1h)-quinolinone_c0	000059-31-4	O=c1ccc2ccccc2[nH]1
1435	2-(1-methylethyl)benzenamine_c0	000643-28-7	CC(C)c1ccccc1N
1436	2-(1-methylethyl)-benzoicacid_c0	002438-04-2	CC(C)c1ccccc1C(=O)O
1437	2-(1-methylethyl)cyclohexanone_c0	001004-77-9	CC(C)C1CCCCC1=O
1438	2-(1-methylethyl)thiophene_c0	004095-22-1	CC(C)c1cccs1
1439	2-(1-naphthalenyloxy)ethanol_c0	000711-82-0	OCCOc1cccc2ccccc12
1440	2-(2-aminoethoxy)ethanol_c0	000929-06-6	NCCOCCO
1441	2-(2-aminoethyl)aminoethanol_c0	000111-41-1	NCCNCCO
1442	2-(2-aminoethyl)pyridine_c0	002706-56-1	NCCc1ccccn1
1443	2-(2-butoxyethoxy)ethanolacetate_c0	000124-17-4	CCCCOCCOCCOC(C)=O
1444	2-(2-ethoxyethoxy)-ethanolacetate_c0	000112-15-2	CCOCCOCCOC(C)=O
1445	2-(2-ethylhexyl)oxyethanol_c0	001559-35-9	CCCCC(CC)COCCO
1446	2-(2-methoxyethoxy)ethanol_c0	000111-77-3	COCCOCCO
1447	2-(2-methoxyethyl)pyridine_c0	000114-91-0	COCCc1ccccn1
1448	2-(2-methylphenyl)aminoethanol_c0	000136-80-1	Cc1ccccc1NCCO
1449	2-(2-pentoxyethoxy)ethanol_c0	018912-81-7	CCCCCOCCOCCO
1450	2-(2-propoxyethoxy)ethanol_c0	006881-94-3	CCCOCCOCCO
1451	2-(3-(5-no2-2-fur)-2-prylid)-hydrazinecarboxamide_c0	000721-71-1	NC(=O)NN=CC=Cc1ccc([N+](=O)[O-])o1
1452	2(3h)-benzofuranone_c0	000553-86-6	O=C1Cc2ccccc2O1
1453	2(3h)-benzothiazolethione_c0	000149-30-4	Sc1nc2ccccc2s1
1454	2(3h)-thiophenone_c0	020893-64-5	O=C1CC=CS1
1455	2-(3-pentenyl)pyridine_c0	002057-43-4	CC=CCCc1ccccn1
1456	2(5h)-furanone_c0	000497-23-4	O=C1C=CCO1
1457	2-(acetyloxy)-propanenitrile_c0	015657-96-2	CC(=O)OC(C)C#N
1458	2-(alpha-methylbenzyloxy)-1-propanol_c0	857237-25-3	CC(CO)OC(C)c1ccccc1
1459	2-(bis(1-methylethyl)amino)ethanol_c0	000096-80-0	CC(C)N(CCO)C(C)C
1460	2-(bromomethyl)tetrahydrofuran_c0	001192-30-9	BrCC1CCCO1
1461	2-(butylamino)ethanol_c0	000111-75-1	CCCCNCCO
1462	2-(chloromethyl)-2-methyloxirane_c0	000598-09-4	CC1(CCl)CO1
1463	2-(diacetoxymethyl)-5-nitrofuran_c0	000092-55-7	CC(=O)OC(OC(C)=O)c1ccc([N+](=O)[O-])o1
1464	2-(diacetoxymethyl)furan_c0	000613-75-2	CC(=O)OC(OC(C)=O)c1ccco1
1465	2-(diethylamino)-ethanol_c0	000100-37-8	CCN(CC)CCO
1466	2-(dimethylamino)-1-propanol_c0	015521-18-3	CC(CO)N(C)C
1467	2-(dimethylamino)benzoicacid_c0	000610-16-2	C[NH+](C)c1ccccc1C(=O)[O-]
1468	2-(dimethylamino)-ethanol_c0	000108-01-0	CN(C)CCO
1469	2-(dimethylamino)ethyl-2-methyl-2-propenoate_c0	002867-47-2	C=C(C)C(=O)OCCN(C)C
1470	2-(ethenyloxy)-2-methylpropane_c0	000926-02-3	C=COC(C)(C)C
1471	2-(ethenyloxy)-ethanol_c0	000764-48-7	C=COCCO
1472	2-(ethenyloxy)-propane_c0	000926-65-8	C=COC(C)C
1473	2-(ethylamino)-ethanesulfonicacid_c0	000107-68-6	C[NH2+]CCS(=O)(=O)[O-]
1474	2-(ethylamino)ethanol_c0	000110-73-6	CCNCCO
1475	2-(ethylphenylamino)ethanol_c0	000092-50-2	CCN(CCO)c1ccccc1
1476	2-(ethylsulfonyl)-2-methylpropane_c0	034008-94-1	CCS(=O)(=O)C(C)(C)C
1477	2-(ethylsulfonyl)ethanol_c0	000513-12-2	CCS(=O)(=O)CCO
1478	2-(ethylthio)-2-methylpropane_c0	014290-92-7	CCSC(C)(C)C
1479	2-(ethylthio)-ethanol_c0	000110-77-0	CCSCCO
1480	2-(methoxymethyl)-furan_c0	013679-46-4	COCc1ccco1
1481	2-(methylamino)benzoicacid_c0	000119-68-6	CNc1ccccc1C(=O)O
1482	2-(methylamino)-benzoicacidmethylester_c0	000085-91-6	CNc1ccccc1C(=O)OC
1483	2-(methylamino)-ethanol_c0	000109-83-1	CNCCO
1484	2-(methylsulfonyl)-2-methylpropane_c0	014094-12-3	CC(C)(C)S(C)(=O)=O
1485	2-(n-morpholino)-2'-hydroxydiethylether_c0	003603-45-0	OCCOCCN1CCOCC1
1486	2-(p-hydroxyphenyl)ethanol_c0	000501-94-0	OCCc1ccc(O)cc1
1487	2-(propylamino)-ethanol_c0	016369-21-4	CCCNCCO
1488	2-(trifluoromethyl)benzenamine_c0	000088-17-5	Nc1ccccc1C(F)(F)F
1489	2-(trimethylsilyl)ethanamine_c0	018135-04-1	C[Si](C)(C)CCN
1490	2,1,3-benzothiadiazole_c0	000273-13-2	c1ccc2nsnc2c1
1491	2,2'-(butylimino)bisethanol_c0	000102-79-4	CCCCN(CCO)CCO
1492	2,2'-(methylimino)bis-ethanol_c0	000105-59-9	CN(CCO)CCO
1493	2,2',2''-nitrilotris-acetonitrile_c0	007327-60-8	N#CCN(CC#N)CC#N
1494	2,2',2''-terpyridine_c0	001148-79-4	c1ccc(-c2cccc(-c3ccccn3)n2)nc1
1495	2,2,2-trichloroethanol_c0	000115-20-8	OCC(Cl)(Cl)Cl
1496	2,2,2-trifluorethylvinylether_c0	000406-90-6	C=COCC(F)(F)F
1497	2,2,2-trifluoro-acetamide_c0	000354-38-1	NC(=O)C(F)(F)F
1498	2,2,2-trifluoroethanol_c0	000075-89-8	OCC(F)(F)F
1499	2,2,2-trifluoroethylamine_c0	000753-90-2	NCC(F)(F)F
1500	2,2,2-trifluoroethylmethylether_c0	000460-43-5	COCC(F)(F)F
1501	2,2,2-trifluoro-n-meethylamine_c0	002730-67-8	CNCC(F)(F)F
1502	2,2,2-trinitro-1-phenylethane_c0	038677-56-4	O=[N+]([O-])C(Cc1ccccc1)([N+](=O)[O-])[N+](=O)[O-]
1503	2,2',3,3',4,4',5,5',6,6'-decafluorobiphenyl_c0	000434-90-2	Fc1c(F)c(F)c(-c2c(F)c(F)c(F)c(F)c2F)c(F)c1F
1504	2,2,3,3,4,4,5,5-octafluoro-1,6-hexanediol_c0	000355-74-8	OCC(F)(F)C(F)(F)C(F)(F)C(F)(F)CO
1505	2,2,3,3-tetraflouro-1-propanol_c0	000076-37-9	OCC(F)(F)C(F)F
1506	2,2,3,3-tetramethylbutane_c0	000594-82-1	CC(C)(C)C(C)(C)C
1507	2,2,3,3-tetramethylhexane_c0	013475-81-5	CCCC(C)(C)C(C)(C)C
1508	2,2,3,3-tetramethylpentane_c0	007154-79-2	CCC(C)(C)C(C)(C)C
1509	2,2,3,4-tetramethylpentane_c0	001186-53-4	CC(C)C(C)C(C)(C)C
1510	2,2,3-trimethyl-butane_c0	000464-06-2	CC(C)C(C)(C)C
1511	2,2,3-trimethylhexane_c0	016747-25-4	CCCC(C)C(C)(C)C
1512	2,2,3-trimethylpentane_c0	000564-02-3	CCC(C)C(C)(C)C
1513	2,2,4,4,6,6-hexamethylcyclotrisilazane_c0	001009-93-4	C[Si]1(C)N[Si](C)(C)N[Si](C)(C)N1
1514	2,2',4,4',6,6'-hexanitrostilbene_c0	020062-22-0	O=[N+]([O-])c1cc([N+](=O)[O-])c(C=Cc2c([N+](=O)[O-])cc([N+](=O)[O-])cc2[N+](=O)[O-])c([N+](=O)[O-])c1
1515	2,2,4,4,6,8,8-heptamethylnonane_c0	004390-04-9	CC(CC(C)(C)C)CC(C)(C)CC(C)(C)C
1516	2,2,4,4-tetramethyl-1,3-cyclobutanedione_c0	000933-52-8	CC1(C)C(=O)C(C)(C)C1=O
1517	2,2,4,4-tetramethyl-3-pentanone_c0	000815-24-7	CC(C)(C)C(=O)C(C)(C)C
1518	2,2,4,4-tetramethylpentane_c0	001070-87-7	CC(C)(C)CC(C)(C)C
1519	2,2,4,6,6-pentamethylheptane_c0	013475-82-6	CC(CC(C)(C)C)CC(C)(C)C
1520	2,2',4-pcb_c0	037680-66-3	Clc1ccc(-c2ccccc2Cl)c(Cl)c1
1521	2,2,4-trimethyl-1,3-pentanediol_c0	000144-19-4	CC(C)C(O)C(C)(C)CO
1522	2,2,4-trimethyl-1,3-pentanedioldiisobutyrate_c0	006846-50-0	CC(C)C(=O)OCC(C)(C)C(OC(=O)C(C)C)C(C)C
1523	2,2,4-trimethyl-2-pentene_c0	000107-40-4	CC(C)=CC(C)(C)C
1524	2,2,4-trimethyl-3-hydroxypentylisobutylate_c0	000077-68-9	CC(C)C(=O)OCC(C)(C)C(O)C(C)C
1525	2,2,4-trimethylhexane_c0	016747-26-5	CCC(C)CC(C)(C)C
1526	2,2,4-trimethylpentane_c0	000540-84-1	CC(C)CC(C)(C)C
1527	2,2,5,5-tetramethylhexane_c0	001071-81-4	CC(C)(C)CCC(C)(C)C
1528	2,2',5-pcb_c0	037680-65-2	Clc1ccc(Cl)c(-c2ccccc2Cl)c1
1529	2,2,5-trimethylhexane_c0	003522-94-9	CC(C)CCC(C)(C)C
1530	2,2,6,6-tetramethyl-4-piperidinone_c0	000826-36-8	CC1(C)CC(=O)CC(C)(C)N1
1531	2,2,6,6-tetramethylpiperidine_c0	000768-66-1	CC1(C)CCCC(C)(C)N1
1532	2,2,6-trimethylcyclohexanone_c0	002408-37-9	CC1CCCC(C)(C)C1=O
1533	2,2,6-trimethylheptane_c0	001190-83-6	CC(C)CCCC(C)(C)C
1534	2,2'-azobis(2-methylpropionitrile)_c0	000078-67-1	CC(C)(C#N)N=NC(C)(C)C#N
1535	2,2'-bipyridine_c0	000366-18-7	c1ccc(-c2ccccn2)nc1
1536	2,2'-bipyridine,1,1'-dioxide_c0	007275-43-6	[O-][n+]1ccccc1-c1cccc[n+]1[O-]
1537	2,2'-biquinoline_c0	000119-91-5	c1ccc2nc(-c3ccc4ccccc4n3)ccc2c1
1538	2,2-bis(hydroxymethyl)propanoicacid_c0	004767-03-7	CC(CO)(CO)C(=O)O
1539	2,2-bis(nitrooxy)methyl-1,3-propanedioldinitrate_c0	000078-11-5	O=[N+]([O-])OCC(CO[N+](=O)[O-])(CO[N+](=O)[O-])CO[N+](=O)[O-]
1540	2,2'-bithiophene_c0	000492-97-7	c1csc(-c2cccs2)c1
1541	2,2-dichloroacetamide_c0	000683-72-7	NC(=O)C(Cl)Cl
1542	2,2-dichlorobutane_c0	004279-22-5	CCC(C)(Cl)Cl
1543	2,2'-dichlorodiethylsulfide_c0	000505-60-2	ClCCSCCCl
1544	2,2-dichloroethanol_c0	000598-38-9	OCC(Cl)Cl
1545	2,2-dichloroethenyldimethylphosphate_c0	000062-73-7	COP(=O)(OC)OC=C(Cl)Cl
1546	2,2-dichloropropane_c0	000594-20-7	CC(C)(Cl)Cl
1547	2,2-diethoxyethanamine_c0	000645-36-3	CCOC(CN)OCC
1548	2,2-diethoxyethanol_c0	000621-63-6	CCOC(CO)OCC
1549	2,2-diethoxypropane_c0	000126-84-1	CCOC(C)(C)OCC
1550	2,2-diethyl-1,3-propanediol_c0	000115-76-4	CCC(CC)(CO)CO
1551	2,2'-difluorobiphenyl_c0	000388-82-9	Fc1ccccc1-c1ccccc1F
1552	2,2-difluoroethanol_c0	000359-13-7	OCC(F)F
1553	2,2-difluoropropane_c0	000420-45-1	CC(C)(F)F
1554	2,2-difluorotetrachloroethane_c0	000076-11-9	FC(F)(Cl)C(Cl)(Cl)Cl
1555	2,2-dimethoxypropane_c0	000077-76-9	COC(C)(C)OC
1556	2,2-dimethyl-1,3-dioxane-4,6-dione_c0	002033-24-1	CC1(C)OC(=O)CC(=O)O1
1557	2,2-dimethyl-1,3-dioxolane_c0	002916-31-6	CC1(C)OCCO1
1558	2,2-dimethyl-1,3-propanediol_c0	000126-30-7	CC(C)(CO)CO
1559	2,2-dimethyl-1,3-propanedioldiacetate_c0	013431-57-7	CC(=O)OCC(C)(C)COC(C)=O
1560	2,2-dimethyl-1-butanol_c0	001185-33-7	CCC(C)(C)CO
1561	2,2-dimethyl-1-propanol_c0	000075-84-3	CC(C)(C)CO
1562	2,2-dimethyl-1-propylamin_c0	005813-64-9	CC(C)(C)CN
1563	2,2-dimethyl-3-hexanol_c0	004209-90-9	CCCC(O)C(C)(C)C
1564	2,2-dimethyl-3-pentanol_c0	003970-62-5	CCC(O)C(C)(C)C
1565	2,2-dimethyl-3-pentanone_c0	000564-04-5	CCC(=O)C(C)(C)C
1566	2,2-dimethyl-4-hydroxymethyl-1,3-dioxolane_c0	000100-79-8	CC1(C)OCC(CO)O1
1567	2,2-dimethyladamantane_c0	019740-34-2	CC1(C)C2CC3CC(C2)CC1C3
1568	2,2'-dimethylbiphenyl_c0	000605-39-0	Cc1ccccc1-c1ccccc1C
1569	2,2-dimethylbutane_c0	000075-83-2	CCC(C)(C)C
1570	2,2-dimethylbutanedioicacid_c0	000597-43-3	CC(C(=O)O)C(C)C(=O)O
1571	2,2-dimethylbutyricacid_c0	000595-37-9	CCC(C)(C)C(=O)O
1572	2,2-dimethylbutyrylchloride_c0	005856-77-9	CCC(C)(C)C(=O)Cl
1573	2,2-dimethylcyclohexanol_c0	001193-46-0	CC1(C)CCCCC1O
1574	2,2-dimethylcyclohexanone_c0	001193-47-1	CC1(C)CCCCC1=O
1575	2,2-dimethylethylenimine_c0	002658-24-4	CC1(C)CN1
1576	2,2-dimethylglutaricacid_c0	000681-57-2	CC(C)(CCC(=O)O)C(=O)O
1577	2,2-dimethylheptane_c0	001071-26-7	CCCCCC(C)(C)C
1578	2,2-dimethylhexane_c0	000590-73-8	CCCCC(C)(C)C
1579	2,2-dimethyloctane_c0	015869-87-1	CCCCCCC(C)(C)C
1580	2,2-dimethyl-oxirane_c0	000558-30-5	CC1(C)CO1
1581	2,2-dimethylpentane_c0	000590-35-2	CCCC(C)(C)C
1582	2,2-dimethylpropanal_c0	000630-19-3	CC(C)(C)C=O
1583	2,2-dimethylpropanamide_c0	000754-10-9	CC(C)(C)C(N)=O
1584	2,2-dimethyl-propanoicacid_c0	000075-98-9	CC(C)(C)C(=O)O
1585	2,2-dimethylpropanoicacidethenylester_c0	003377-92-2	C=COC(=O)C(C)(C)C
1586	2,2-dimethylpropiophenone_c0	000938-16-9	CC(C)(C)C(=O)c1ccccc1
1587	2,2-dimethylvalericacid_c0	001185-39-3	CCCC(C)(C)C(=O)O
1588	2,2-dinitroadamantane_c0	088381-75-3	O=[N+]([O-])C1([N+](=O)[O-])C2CC3CC(C2)CC1C3
1589	2,2'-diselenobis-2-methylpropionicacid_c0	022686-44-8	CC(C)([Se][Se]C(C)(C)C(=O)O)C(=O)O
1590	2,2'-iminobis-acetonitrile_c0	000628-87-5	N#CCNCC#N
1591	2,2-metaparacyclophane_c0	005385-36-4	c1cc2cc(c1)CCc1ccc(cc1)CC2
1592	2,2'-methylenebisbenzeneamine_c0	006582-52-1	Nc1ccccc1Cc1ccccc1N
1593	2,2'-oxybis(2,1-ethanediyloxy)bisethanol_c0	000112-60-7	OCCOCCOCCOCCO
1594	2,2'-oxybisaceticacid_c0	000110-99-6	O=C(O)COCC(=O)O
1595	2,2'-oxybis-butane_c0	006863-58-7	CCC(C)OC(C)CC
1596	2,2'-oxybisethanethiol_c0	002150-02-9	SCCOCCS
1597	2,2'-pcb_c0	013029-08-8	Clc1ccccc1-c1ccccc1Cl
1598	2,2'-selenobisaceticacid_c0	006228-62-2	O=C(O)C[Se]CC(=O)O
1599	2,2'-selenobispropanoicacid_c0	022659-18-3	CC([Se]C(C)C(=O)O)C(=O)O
1600	2,2'-thiobis2-methylpropane_c0	000107-47-1	CC(C)(C)SC(C)(C)C
1601	2,2'-thiobisaceticacid_c0	000123-93-3	O=C(O)CSCC(=O)O
1602	2,2'-thiobisbutane_c0	000626-26-6	CCC(C)SC(C)CC
1603	2,2'-thiobisethanol_c0	000111-48-8	OCCSCCO
1604	2,3,3,4-tetramethylpentane_c0	016747-38-9	CC(C)C(C)(C)C(C)C
1605	2,3,3,-trimethyl-2-butanol_c0	000594-83-2	CC(C)(C)C(C)(C)O
1606	2,3,3-trimethyl-1-butene_c0	000594-56-9	C=C(C)C(C)(C)C
1607	2,3,3-trimethyl-1-pentene_c0	000560-23-6	C=C(C)C(C)(C)CC
1608	2,3,3-trimethylpentane_c0	000560-21-4	CCC(C)(C)C(C)C
1609	2,3,4,2',3',4'-pcb_c0	038380-07-3	Clc1ccc(-c2ccc(Cl)c(Cl)c2Cl)c(Cl)c1Cl
1610	2,3,4,2',5'-pcb_c0	038380-02-8	Clc1ccc(Cl)c(-c2ccc(Cl)c(Cl)c2Cl)c1
1611	2,3,4,5,2',3',4',5'-octahydro-bifuryl-(3,3')_c0	106538-38-9	C1CC(C2CCOC2)CO1
1612	2,3,4,5,6,2',5'-pcb_c0	052712-05-7	Clc1ccc(Cl)c(-c2c(Cl)c(Cl)c(Cl)c(Cl)c2Cl)c1
1613	2,3,4,5,6-pcb_c0	018259-05-7	Clc1c(Cl)c(Cl)c(-c2ccccc2)c(Cl)c1Cl
1614	2,3,4,5,6-pentafluoroaniline_c0	000771-60-8	Nc1c(F)c(F)c(F)c(F)c1F
1615	2,3,4,5,6-pentamethylbenzenamine_c0	002243-30-3	Cc1c(C)c(C)c(N)c(C)c1C
1616	2,3,4,5-tetrachloroaniline_c0	000634-83-3	Nc1cc(Cl)c(Cl)c(Cl)c1Cl
1617	2,3,4,5-tetrachloronitrobenzene_c0	000879-39-0	O=[N+]([O-])c1cc(Cl)c(Cl)c(Cl)c1Cl
1618	2,3,4,5-tetrachlorophenol_c0	004901-51-3	Oc1cc(Cl)c(Cl)c(Cl)c1Cl
1619	2,3,4,5-tetramethyl-1h-pyrrole_c0	001003-90-3	Cc1[nH]c(C)c(C)c1C
1620	2,3,4,5-tetramethylbenzoicacid_c0	002529-39-7	Cc1cc(C(=O)O)c(C)c(C)c1C
1621	2,3,4,5-tetramethylphenol_c0	000488-70-0	Cc1cc(O)c(C)c(C)c1C
1622	2,3,4,6-tetrachlorophenol_c0	000058-90-2	Oc1c(Cl)cc(Cl)c(Cl)c1Cl
1623	2,3,4,6-tetramethylbenzoicacid_c0	002408-38-0	Cc1cc(C)c(C(=O)O)c(C)c1C
1624	2,3,4,6-tetramethylphenol_c0	003238-38-8	Cc1cc(C)c(O)c(C)c1C
1625	2,3,4-trichloroaniline_c0	000634-67-3	Nc1ccc(Cl)c(Cl)c1Cl
1626	2',3,4-trichlorobiphenyl_c0	038444-86-9	Clc1ccc(-c2ccccc2Cl)cc1Cl
1627	2,3,4-trichlorophenol_c0	015950-66-0	Oc1ccc(Cl)c(Cl)c1Cl
1628	2,3,4-trimethyl-2-pentene_c0	000565-77-5	CC(C)=C(C)C(C)C
1629	2,3,4-trimethyl-3-pentanol_c0	003054-92-0	CC(C)C(C)(O)C(C)C
1630	2,3,4-trimethylbenzoicacid_c0	001076-47-7	Cc1ccc(C(=O)O)c(C)c1C
1631	2,3,4-trimethylhexane_c0	000921-47-1	CCC(C)C(C)C(C)C
1632	2,3,4-trimethylpentane_c0	000565-75-3	CC(C)C(C)C(C)C
1633	2,3,4-trimethylphenol_c0	000526-85-2	Cc1ccc(O)c(C)c1C
1634	2,3,4-trimethylpyridine_c0	002233-29-6	Cc1ccnc(C)c1C
1635	2,3,4-trimethylthiophene_c0	001795-04-6	Cc1csc(C)c1C
1636	2,3,5,6-tetrachloroaniline_c0	003481-20-7	Nc1c(Cl)c(Cl)cc(Cl)c1Cl
1637	2,3,5,6-tetrachloronitrobenzene_c0	000117-18-0	O=[N+]([O-])c1c(Cl)c(Cl)cc(Cl)c1Cl
1638	2,3,5,6-tetrachloro-p-benzoquinone_c0	000118-75-2	O=C1C(Cl)=C(Cl)C(=O)C(Cl)=C1Cl
1639	2,3,5,6-tetrachlorophenol_c0	000935-95-5	Oc1c(Cl)c(Cl)cc(Cl)c1Cl
1640	2,3,5,6-tetrafluoropyridine_c0	002875-18-5	Fc1cc(F)c(F)nc1F
1641	2,3,5,6-tetramethyl-1,4-benzenediol_c0	000527-18-4	Cc1c(C)c(O)c(C)c(C)c1O
1642	2,3,5,6-tetramethylbenzoicacid_c0	002604-45-7	Cc1cc(C)c(C)c(C(=O)O)c1C
1643	2,3,5,6-tetramethylphenol_c0	000527-35-5	Cc1cc(C)c(C)c(O)c1C
1644	2,3,5-trichloro-1,4-benzenediol_c0	000608-94-6	Oc1cc(Cl)c(O)c(Cl)c1Cl
1645	2,3,5-trichloro-2,5-cyclohexadiene-1,4-dione_c0	000634-85-5	O=C1C=C(Cl)C(=O)C(Cl)=C1Cl
1646	2,3,5-trichlorophenol_c0	000933-78-8	Oc1cc(Cl)cc(Cl)c1Cl
1647	2,3,5-trimethyl-1,4-benzenediol_c0	000700-13-0	Cc1cc(O)c(C)c(C)c1O
1648	2,3,5-trimethylbenzoicacid_c0	002437-66-3	Cc1cc(C)c(C)c(C(=O)O)c1
1649	2,3,5-trimethylhexane_c0	001069-53-0	CC(C)CC(C)C(C)C
1650	2,3,5-trimethylphenol_c0	000697-82-5	Cc1cc(C)c(C)c(O)c1
1651	2,3,5-trimethylpyridine_c0	000695-98-7	Cc1cnc(C)c(C)c1
1652	2,3,5-trimethylthiophene_c0	001795-05-7	Cc1cc(C)c(C)s1
1653	2,3,6-trimethylbenzoicacid_c0	002529-36-4	Cc1ccc(C)c(C(=O)O)c1C
1654	2,3,6-trimethylheptane_c0	004032-93-3	CC(C)CCC(C)C(C)C
1655	2,3,6-trimethylphenol_c0	002416-94-6	Cc1ccc(C)c(O)c1C
1656	2,3,6-trimethylpyridine_c0	001462-84-6	Cc1ccc(C)c(C)n1
1657	2,3,7,8-tcdd_c0	001746-01-6	Clc1cc2c(cc1Cl)Oc1cc(Cl)c(Cl)cc1O2
1658	2,3,7,8-tetrachlorodibenzofuran_c0	051207-31-9	Clc1cc2oc3cc(Cl)c(Cl)cc3c2cc1Cl
1659	2,3-5,6-dibenzoxalene_c0	000243-24-3	c1ccc2oc3cc4ccccc4c-3cc2c1
1660	2,3'-bipyridine_c0	000581-50-0	c1ccc(-c2cccnc2)nc1
1661	2,3-butanediol(meso)_c0	005341-95-7	CC(O)C(C)O
1662	2,3-butanedionedioxime_c0	000095-45-4	CC(=NO)C(C)=NO
1663	2,3-butanedionemonooxime_c0	000057-71-6	CC(=O)C(C)=NO
1664	2,3-diaminotoluene_c0	002687-25-4	Cc1cccc(N)c1N
1665	2,3-diazabicyclo(2,2,1)-hept-2-ene_c0	002721-32-6	C1CC2CC1N=N2
1666	2,3-dibenzo-15-crown-5-ether_c0	014262-60-3	c1ccc2c(c1)OCCOCCOc1ccccc1OCCO2
1667	2,3-dichloro-1,4-dioxane_c0	000095-59-0	ClC1OCCOC1Cl
1668	2,3-dichloro-1-propanol_c0	000616-23-9	OCC(Cl)CCl
1669	2,3-dichloro-1-propene_c0	000078-88-6	C=C(Cl)CCl
1670	2,3-dichloro-2-methylbutane_c0	000507-45-9	CC(Cl)C(C)(C)Cl
1671	2,3-dichloroaniline_c0	000608-27-5	Nc1cccc(Cl)c1Cl
1672	2,3-dichlorobiphenyl_c0	016605-91-7	Clc1cccc(-c2ccccc2)c1Cl
1673	2,3-dichlorobuta-1,3-diene_c0	001653-19-6	C=C(Cl)C(=C)Cl
1674	2,3-dichlorobutane_c0	002211-67-8	CC(Cl)C(C)Cl
1675	2,3-dichlorodibenzo-p-dioxin_c0	029446-15-9	Clc1cc2c(cc1Cl)Oc1ccccc1O2
1676	2,3-dichloropentane_c0	000600-11-3	CCC(Cl)C(C)Cl
1677	2,3-dichlorophenol_c0	000576-24-9	Oc1cccc(Cl)c1Cl
1678	2,3-dichloropropionicacid_c0	000565-64-0	O=C(O)C(Cl)CCl
1679	2,3-dichloropyridine_c0	002402-77-9	Clc1cccnc1Cl
1680	2,3-dihydro-1,4-dioxin_c0	000543-75-9	C1=COCCO1
1681	2,3-dihydro-1,5-dimethyl-1h-pyrrole_c0	005370-57-0	CC1=CCCN1C
1682	2,3-dihydro-1h-imidazo(1,2-b)pyrazole_c0	006714-29-0	c1cc2n(n1)CCN2
1683	2,3-dihydro-1h-inden-1-one_c0	000083-33-0	O=C1CCc2ccccc21
1684	2,3-dihydro-1h-isoindol-1-one_c0	000480-91-1	O=C1NCc2ccccc21
1685	2,3-dihydro-1-methyl-1h-indene_c0	000767-58-8	CC1CCc2ccccc21
1686	2,3-dihydro-2-methyl-1h-indene_c0	000824-63-5	CC1Cc2ccccc2C1
1687	2,3-dihydro-2-methylbenzofuran_c0	001746-11-8	CC1Cc2ccccc2O1
1688	2,3-dihydro-4h-1-benzopyran-4-one_c0	000491-37-2	O=C1CCOc2ccccc21
1689	2,3-dihydro-4h-1-benzothiopyran-4-one_c0	003528-17-4	O=C1CCSc2ccccc21
1690	2,3-dihydro-4-methyl-1h-indene_c0	000824-22-6	Cc1cccc2c1CCC2
1691	2,3-dihydro-5-methyl-1h-indene_c0	000874-35-1	Cc1ccc2c(c1)CCC2
1692	2,3-dihydrobenzofuran_c0	000496-16-2	c1ccc2c(c1)CCO2
1693	2,3-dihydrofuran_c0	001191-99-7	C1=COCC1
1694	2,3-dihydropyran_c0	000110-87-2	C1=COCCC1
1695	2,3-dihydrothiophene_c0	001120-59-8	C1=CSCC1
1696	2,3-dihydrothiophene-1,1-dioxide_c0	001192-16-1	O=S1(=O)C=CCC1
1697	2,3-dihydroxybenzoicacid_c0	000303-38-8	O=C(O)c1cccc(O)c1O
1698	2,3-dihydroxybutanedioicacid_c0	000526-83-0	O=C(O)C(O)C(O)C(=O)O
1699	2,3-dihydroxybutanedioicaciddimethylester_c0	000608-69-5	COC(=O)C(O)C(O)C(=O)OC
1700	2,3-dimethoxybenzoicacid_c0	001521-38-6	COc1cccc(C(=O)O)c1OC
1701	2,3-dimethyl-1,3-butadiene_c0	000513-81-5	C=C(C)C(=C)C
1702	2,3-dimethyl-1,4-benzenediol_c0	000608-43-5	Cc1c(O)ccc(O)c1C
1703	2,3-dimethyl-1-butene_c0	000563-78-0	C=C(C)C(C)C
1704	2,3-dimethyl-1-hexene_c0	016746-86-4	C=C(C)C(C)CCC
1705	2,3-dimethyl-1h-indole_c0	000091-55-4	Cc1[nH]c2ccccc2c1C
1706	2,3-dimethyl-1-pentene_c0	003404-72-6	C=C(C)C(C)CC
1707	2,3-dimethyl-2,5-cyclohexadiene-1,4-dione_c0	000526-86-3	CC1=C(C)C(=O)C=CC1=O
1708	2,3-dimethyl-2-butanol_c0	000594-60-5	CC(C)C(C)(C)O
1709	2,3-dimethyl-2-butene_c0	000563-79-1	CC(C)=C(C)C
1710	2,3-dimethyl-2-hexene_c0	007145-20-2	CCCC(C)=C(C)C
1711	2,3-dimethyl-2-pentene_c0	010574-37-5	CCC(C)=C(C)C
1712	2,3-dimethyl-3-buten-2-ol_c0	010473-13-9	C=C(C)C(C)(C)O
1713	2,3-dimethyl-3-pentanol_c0	000595-41-5	CCC(C)(O)C(C)C
1714	2,3-dimethylbenzoicacid_c0	000603-79-2	Cc1cccc(C(=O)O)c1C
1715	2,3-dimethylbenzothiophene_c0	004923-91-5	Cc1sc2ccccc2c1C
1716	2,3-dimethylbicyclo(2-2-1)hept-2-ene_c0	000529-16-8	CC1=C(C)C2CCC1C2
1717	2,3-dimethylbutane_c0	000079-29-8	CC(C)C(C)C
1718	2,3-dimethylbutanol_c0	019550-30-2	CC(C)C(C)CO
1719	2,3-dimethylchlorobenzene_c0	000608-23-1	Cc1cccc(Cl)c1C
1720	2,3-dimethylhexane_c0	000584-94-1	CCCC(C)C(C)C
1721	2,3-dimethylnaphthalene_c0	000581-40-8	Cc1cc2ccccc2cc1C
1722	2,3-dimethyloctane_c0	007146-60-3	CCCCCC(C)C(C)C
1723	2,3-dimethylpentane_c0	000565-59-3	CCC(C)C(C)C
1724	2,3-dimethylphenol_c0	000526-75-0	Cc1cccc(O)c1C
1725	2,3-dimethylpyrazine_c0	005910-89-4	Cc1nccnc1C
1726	2,3-dimethylquinoline_c0	001721-89-7	Cc1cc2ccccc2nc1C
1727	2,3-dimethylquinoxaline_c0	002379-55-7	Cc1nc2ccccc2nc1C
1728	2,3-dimethylthiophene_c0	000632-16-6	Cc1ccsc1C
1729	2,3-dinitrophenol_c0	000066-56-8	O=[N+]([O-])c1cccc(O)c1[N+](=O)[O-]
1730	2,3-diphenyl-2-cyclopropen-1-one_c0	000886-38-4	O=c1c(-c2ccccc2)c1-c1ccccc1
1731	2,3-naphthalenediamine_c0	000771-97-1	Nc1cc2ccccc2cc1N
1732	2,3-naphthalenediol_c0	000092-44-4	Oc1cc2ccccc2cc1O
1733	2,3-pentadiene_c0	000591-96-8	CC=C=CC
1734	2,3-pentanedione_c0	000600-14-6	CCC(=O)C(C)=O
1735	2,3-xylidine_c0	000087-59-2	Cc1cccc(N)c1C
1736	2,4(1h,3h)pyrimidinedithione_c0	002001-93-6	S=c1cc[nH]c(=S)[nH]1
1737	2,4,10-trioxatricyclo-[3,3,1,13,7]decane_c0	000281-32-3	C1C2CC3CC1OC(O2)O3
1738	2,4,4'-pcb_c0	007012-37-5	Clc1ccc(-c2ccc(Cl)cc2Cl)cc1
1739	2,4,4-trimethyl-1-pentene_c0	000107-39-1	C=C(C)CC(C)(C)C
1740	2,4,4-trimethyl-2-pentanethiol_c0	000141-59-3	CC(C)(C)CC(C)(C)S
1741	2,4,4-trimethylcyclohexanone_c0	002230-70-8	CC1CC(C)(C)CCC1=O
1742	2,4,4-trimethylheptane_c0	004032-92-2	CCCC(C)(C)CC(C)C
1743	2,4,4-trimethylhexane_c0	016747-30-1	CCC(C)(C)CC(C)C
1744	2,4,5,2',4',5'-pcb_c0	035065-27-1	Clc1cc(Cl)c(-c2cc(Cl)c(Cl)cc2Cl)cc1Cl
1745	2,4,5,2',5'-pcb_c0	037680-73-2	Clc1ccc(Cl)c(-c2cc(Cl)c(Cl)cc2Cl)c1
1746	2,4,5,6(1h,3h)-pyrimidinetetrone-5-oxime_c0	000087-39-8	O=C1NC(=O)C(=NO)C(=O)N1
1747	2,4,5,7-tetramethyl-4,5-bis(4-tert-buph)octane_c0	085668-75-3	CC(C)CC(C)(c1ccc(C(C)(C)C)cc1)C(C)(CC(C)C)c1ccc(C(C)(C)C)cc1
1748	2,4,5,7-tetramethylphenanthrene_c0	007396-38-5	Cc1cc(C)c2c(ccc3cc(C)cc(C)c32)c1
1749	2,4,5-trichlorophenol_c0	000095-95-4	Oc1cc(Cl)c(Cl)cc1Cl
1750	2,4,5-trimethylaniline_c0	000137-17-7	Cc1cc(C)c(N)cc1C
1751	2,4,5-trimethyl-benzoicacid_c0	000528-90-5	Cc1cc(C)c(C(=O)O)cc1C
1752	2,4,5-trimethylphenol_c0	000496-78-6	Cc1cc(C)c(O)cc1C
1753	2,4,5-trimethylpyridine_c0	001122-39-0	Cc1cc(C)c(C)cn1
1754	2,4,6,8,10-pentamethylcyclopentasiloxane_c0	006166-86-5	C[SiH]1O[SiH](C)O[SiH](C)O[SiH](C)O[SiH](C)O1
1755	2,4,6,8-tetraethenylcyclotetrasiloxane_c0	002554-06-5	C=C[Si]1(C)O[Si](C)(C=C)O[Si](C)(C=C)O[Si](C)(C=C)O1
1756	2,4,6,8-tetrathiatricyclo(3-3-1-1(3,7))decane_c0	007000-79-5	CC12CC3(C)SC(C)(CC(C)(S1)S3)S2
1757	2,4,6-collidine_c0	000108-75-8	Cc1cc(C)nc(C)c1
1758	2,4,6-cycloheptatrien-1-one_c0	000539-80-0	O=c1cccccc1
1759	2,4,6-heptanetrione_c0	000626-53-9	CC(=O)CC(=O)CC(C)=O
1760	2,4,6-tri(tert-butyl)phenol_c0	000732-26-3	CC(C)(C)c1cc(C(C)(C)C)c(O)c(C(C)(C)C)c1
1761	2,4,6-tribromobenzeneamine_c0	000147-82-0	Nc1c(Br)cc(Br)cc1Br
1762	2,4,6-tribromo-phenol_c0	000118-79-6	Oc1c(Br)cc(Br)cc1Br
1763	2,4,6-trichloro-1,3,5-trimethylborazine_c0	000703-86-6	CN1B(Cl)N(C)B(Cl)N(C)B1Cl
1764	2,4,6-trichlorophenol_c0	000088-06-2	Oc1c(Cl)cc(Cl)cc1Cl
1765	2,4,6-trifluoropyrimidine_c0	000696-82-2	Fc1cc(F)nc(F)n1
1766	2,4,6-trimethoxy-1,3,5-triazine_c0	000877-89-4	COc1nc(OC)nc(OC)n1
1767	2,4,6-trimethoxybenzonitrile_c0	002571-54-2	COc1cc(OC)c(C#N)c(OC)c1
1768	2,4,6-trimethylbenzaldehyde_c0	000487-68-3	Cc1cc(C)c(C=O)c(C)c1
1769	2,4,6-trimethylbenzenamine_c0	000088-05-1	Cc1cc(C)c(N)c(C)c1
1770	2,4,6-trimethylbenzoicacid_c0	000480-63-7	Cc1cc(C)c(C(=O)O)c(C)c1
1771	2,4,6-trimethylbenzonitrile_c0	002571-52-0	Cc1cc(C)c(C#N)c(C)c1
1772	2,4,6-trimethylbenzonitrile-n-oxide_c0	002904-57-6	Cc1cc(C)c(C#[N+][O-])c(C)c1
1773	2,4,6-trimethylheptane_c0	002613-61-8	CC(C)CC(C)CC(C)C
1774	2,4,6-trimethylphenol_c0	000527-60-6	Cc1cc(C)c(O)c(C)c1
1775	2,4,6-trinitro-1,3,5-benzenetriamine_c0	003058-38-6	Nc1c([N+](=O)[O-])c(N)c([N+](=O)[O-])c(N)c1[N+](=O)[O-]
1776	2,4,6-trinitro-1,3-dimethyl-5-tert-butylbenzene_c0	000081-15-2	Cc1c([N+](=O)[O-])c(C)c([N+](=O)[O-])c(C(C)(C)C)c1[N+](=O)[O-]
1777	2,4,6-trinitrophenol_c0	000088-89-1	O=[N+]([O-])c1cc([N+](=O)[O-])c(O)c([N+](=O)[O-])c1
1778	2,4,6-trinitroresorcinol_c0	000082-71-3	O=[N+]([O-])c1cc([N+](=O)[O-])c(O)c([N+](=O)[O-])c1O
1779	2,4,6-tripicryltriazine_c0	049753-54-0	O=[N+]([O-])c1cc([N+](=O)[O-])c(-c2nc(-c3c([N+](=O)[O-])cc([N+](=O)[O-])cc3[N+](=O)[O-])nc(-c3c([N+](=O)[O-])cc([N+](=O)[O-])cc3[N+](=O)[O-])n2)c([N+](=O)[O-])c1
1780	2,4,6-tri-t-butyl-nitrosobenzene_c0	024973-59-9	CC(C)(C)c1cc(C(C)(C)C)c(N=O)c(C(C)(C)C)c1
1781	2,4'-bipyridine_c0	000581-47-5	c1ccc(-c2ccncc2)nc1
1782	2,4-bis(1,1-dimethylethyl)-phenol_c0	000096-76-4	CC(C)(C)c1ccc(O)c(C(C)(C)C)c1
1783	2,4diaminoanisole_c0	000615-05-4	COc1ccc(N)cc1N
1784	2,4-diaminobenzoicacid_c0	000611-03-0	Nc1ccc(C(=O)O)c(N)c1
1785	2,4-diaminophenol_c0	000095-86-3	Nc1ccc(O)c(N)c1
1786	2,4-dibromophenol_c0	000615-58-7	Oc1ccc(Br)cc1Br
1787	2,4-dichloro-1-(trifluoromethyl)-benzene_c0	000320-60-5	FC(F)(F)c1ccc(Cl)cc1Cl
1788	2,4-dichloro-1-methylbenzene_c0	000095-73-8	Cc1ccc(Cl)cc1Cl
1789	2,4-dichloro-5-methylpyrimidine_c0	001780-31-0	Cc1cnc(Cl)nc1Cl
1790	2,4-dichloroaniline_c0	000554-00-7	Nc1ccc(Cl)cc1Cl
1791	2,4-dichloropentane_c0	000625-67-2	CC(Cl)CC(C)Cl
1792	2,4-dichlorophenol_c0	000120-83-2	Oc1ccc(Cl)cc1Cl
1793	2,4-dichloroquinoline_c0	000703-61-7	Clc1cc(Cl)c2ccccc2n1
1794	2,4-difluoro-1-nitrobenzene_c0	000446-35-5	O=[N+]([O-])c1ccc(F)cc1F
1795	2,4-difluoroaniline_c0	000367-25-9	Nc1ccc(F)cc1F
1796	2,4-dihydroxy-2-methylbutane_c0	002568-33-4	CC(C)(O)CCO
1797	2,4-dihydroxy-3-methylpyrimidine_c0	000608-34-4	Cn1c(=O)cc[nH]c1=O
1798	2,4-dihydroxybenzaldehyde_c0	000095-01-2	O=Cc1ccc(O)cc1O
1799	2,4-dihydroxybenzoicacid_c0	000089-86-1	O=C(O)c1ccc(O)cc1O
1800	2,4-diisocyanato-1-methylbenzene_c0	000584-84-9	Cc1ccc(N=C=O)cc1N=C=O
1801	2,4-dimethoxybenzaldehyd_c0	000613-45-6	COc1ccc(C=O)c(OC)c1
1802	2,4-dimethoxybenzoicacid_c0	000091-52-1	COc1ccc(C(=O)O)c(OC)c1
1803	2,4-dimethyl-1,3,5-trinitro-benzene_c0	000632-92-8	Cc1c([N+](=O)[O-])cc([N+](=O)[O-])c(C)c1[N+](=O)[O-]
1804	2,4-dimethyl-1,3-dioxane_c0	000766-20-1	CC1CCOC(C)O1
1805	2,4-dimethyl-1,3-dioxolane-2-methanol_c0	053951-43-2	CC1COC(C)(CO)O1
1806	2,4-dimethyl-1,3-pentadiene_c0	001000-86-8	C=C(C)C=C(C)C
1807	2,4-dimethyl-1-pentene_c0	002213-32-3	C=C(C)CC(C)C
1808	2,4-dimethyl-2,4-heptadiene_c0	074421-05-9	CCC=C(C)C=C(C)C
1809	2,4-dimethyl-2-pentanol_c0	000625-06-9	CC(C)CC(C)(C)O
1810	2,4-dimethyl-2-pentene_c0	000625-65-0	CC(C)=CC(C)C
1811	2,4-dimethyl-3-pentanol_c0	000600-36-2	CC(C)C(O)C(C)C
1812	2,4-dimethyl-3-pentanone_c0	000565-80-0	CC(C)C(=O)C(C)C
1813	2,4-dimethyl-3-thiapentane_c0	000625-80-9	CC(C)SC(C)C
1814	2,4-dimethylacetanilide_c0	002050-43-3	CC(=O)Nc1ccc(C)cc1C
1815	2,4-dimethylaniline_c0	000095-68-1	Cc1ccc(N)c(C)c1
1816	2,4-dimethylbenzoicacid_c0	000611-01-8	Cc1ccc(C(=O)O)c(C)c1
1817	2,4-dimethylbenzonitrile_c0	021789-36-6	Cc1ccc(C#N)c(C)c1
1818	2,4-dimethylfuran_c0	003710-43-8	Cc1coc(C)c1
1819	2,4-dimethylheptane_c0	002213-23-2	CCCC(C)CC(C)C
1820	2,4-dimethylhexane_c0	000589-43-5	CCC(C)CC(C)C
1821	2,4-dimethyloctane_c0	004032-94-4	CCCCC(C)CC(C)C
1822	2,4-dimethyloxazole_c0	007208-05-1	Cc1coc(C)n1
1823	2,4-dimethylpentane_c0	000108-08-7	CC(C)CC(C)C
1824	2,4-dimethylphenol_c0	000105-67-9	Cc1ccc(O)c(C)c1
1825	2,4-dimethylphenylacetate_c0	000877-53-2	CC(=O)Oc1ccc(C)cc1C
1826	2,4-dimethylpyridine_c0	000108-47-4	Cc1ccnc(C)c1
1827	2,4-dimethylpyrimidine_c0	014331-54-5	Cc1ccnc(C)n1
1828	2,4-dimethylpyrrole_c0	000625-82-1	Cc1c[nH]c(C)c1
1829	2,4-dimethylquinoline_c0	001198-37-4	Cc1cc(C)c2ccccc2n1
1830	2,4-dimethylthiazole_c0	000541-58-2	Cc1csc(C)n1
1831	2,4-dimethylthiophene_c0	000638-00-6	Cc1csc(C)c1
1832	2,4-dinitro-n-phenylbenzeneamine_c0	000961-68-2	O=[N+]([O-])c1ccc(Nc2ccccc2)c([N+](=O)[O-])c1
1833	2,4-dinitro-phenol_c0	000051-28-5	O=[N+]([O-])c1ccc(O)c([N+](=O)[O-])c1
1834	2,4-dithiapentane_c0	001618-26-4	CSCSC
1835	2,4-hexadien-1-ol_c0	000111-28-4	CC=CC=CCO
1836	2,4-hexadienal_c0	000142-83-6	CC=CC=CC=O
1837	2,4-hexadienoicacidethylester_c0	002396-84-1	CC=CC=CC(=O)OCC
1838	2,4-hexadienoicacidmethylester_c0	001515-80-6	CC=CC=CC(=O)OC
1839	2,4-hexadiyne_c0	002809-69-0	CC#CC#CC
1840	2,4-hexanediol_c0	019780-90-6	CCC(O)CC(C)O
1841	2,4-hexanedione_c0	003002-24-2	CCC(=O)CC(C)=O
1842	2,4'-pcb_c0	034883-43-7	Clc1ccc(-c2ccccc2Cl)cc1
1843	2,4-pentadienenitrile_c0	001615-70-9	C=CC=CC#N
1844	2,4-pentanediol_c0	000625-69-4	CC(O)CC(C)O
1845	2,4-pyridinedicarboxylicacid_c0	000499-80-9	O=C(O)c1ccnc(C(=O)O)c1
1846	2,4-thiazolidinedione_c0	002295-31-0	O=C1CSC(=O)N1
1847	2,5,2',5'-pcb_c0	035693-99-3	Clc1ccc(Cl)c(-c2cc(Cl)ccc2Cl)c1
1848	2,5,5-trimethylheptane_c0	001189-99-7	CCC(C)(C)CCC(C)C
1849	2,5,8,11,14,17-hexaoxaoctadecane_c0	001191-87-3	COCCOCCOCCOCCOCCOC
1850	2,5,8,11,14-pentaoxapentadecane_c0	000143-24-8	COCCOCCOCCOCCOC
1851	2,5,8,11-tetraoxadodecane_c0	000112-49-2	COCCOCCOCCOC
1852	2,5-bis(1,1-dimethylethyl)phenol_c0	005875-45-6	CC(C)(C)c1ccc(C(C)(C)C)c(O)c1
1853	2,5-cyclohexadiene-1,4-dione-dioxime_c0	000105-11-3	ON=C1C=CC(=NO)C=C1
1854	2,5-diaminopyridine_c0	004318-76-7	Nc1ccc(N)nc1
1855	2,5-diazahexane_c0	000110-70-3	CNCCNC
1856	2,5-dichloroaniline_c0	000095-82-9	Nc1cc(Cl)ccc1Cl
1857	2,5-dichlorophenol_c0	000583-78-8	Oc1cc(Cl)ccc1Cl
1858	2,5-dichlorothiophene_c0	003172-52-9	Clc1ccc(Cl)s1
1859	2,5-dihydro-2,5-dimethoxyfuran_c0	000332-77-4	COC1C=CC(OC)O1
1860	2,5-dihydro-2-methyl-thiophene-1,1-dioxide_c0	006007-71-2	CC1C=CCS1(=O)=O
1861	2,5-dihydro-3-methylthiophene-1,1-dioxide_c0	001193-10-8	CC1=CCS(=O)(=O)C1
1862	2,5-dihydro-furan_c0	001708-29-8	C1=CCOC1
1863	2,5-dihydroperoxy-2,5-dimethylhex-3-yne_c0	003491-36-9	CC(C)(C#CC(C)(C)OO)OO
1864	2,5-dihydrothiophene_c0	001708-32-3	C1=CCSC1
1865	2,5-dihydrothiophenesulfone_c0	000077-79-2	O=S1(=O)CC=CC1
1866	2,5-dihydroxybenzoicacid_c0	000490-79-9	O=C(O)c1cc(O)ccc1O
1867	2,5-dimethoxyaniline_c0	000102-56-7	COc1ccc(OC)c(N)c1
1868	2,5-dimethoxybenzaldehyde_c0	000093-02-7	COc1ccc(OC)c(C=O)c1
1869	2,5-dimethoxybenzoicacid_c0	002785-98-0	COc1ccc(OC)c(C(=O)O)c1
1870	2,5-dimethyl-1,3,4-thiadiazole_c0	027464-82-0	Cc1nnc(C)s1
1871	2,5-dimethyl-1,3,5-hexatriene_c0	004916-63-6	C=C(C)C=CC(=C)C
1872	2,5-dimethyl-1,3-benzenediol_c0	000488-87-9	Cc1cc(O)c(C)c(O)c1
1873	2,5-dimethyl-1,4-benzenediol_c0	000615-90-7	Cc1cc(O)c(C)cc1O
1874	2,5-dimethyl-1,5-hexadiene_c0	000627-58-7	C=C(C)CCC(=C)C
1875	2,5-dimethyl-1-hexene_c0	006975-92-4	C=C(C)CCC(C)C
1876	2,5-dimethyl-2,4-hexadiene_c0	000764-13-6	C=C(C)CC=C(C)C
1877	2,5-dimethyl-2,5-cyclohexadiene-1,4-dione_c0	000137-18-8	CC1=CC(=O)C(C)=CC1=O
1878	2,5-dimethyl-2,5-hexanediol_c0	000110-03-2	CC(C)(O)CCC(C)(C)O
1879	2,5-dimethyl-2-hexanol_c0	003730-60-7	CC(C)CCC(C)(C)O
1880	2,5-dimethyl-2-hexene_c0	003404-78-2	CC(C)=CCC(C)C
1881	2,5-dimethyl-3-hexanone_c0	001888-57-9	CC(C)CC(=O)C(C)C
1882	2,5-dimethyl-3-hexene_c0	015910-22-2	CC(C)C=CC(C)C
1883	2,5-dimethyl-3-hexyne-2,5-diol_c0	000142-30-3	CC(C)(O)C#CC(C)(C)O
1884	2,5-dimethylbenzaldehyde_c0	005779-94-2	Cc1ccc(C)c(C=O)c1
1885	2,5-dimethylbenzoicacid_c0	000610-72-0	Cc1ccc(C)c(C(=O)O)c1
1886	2,5-dimethylcyclopentanone_c0	004041-09-2	CC1CCC(C)C1=O
1887	2,5-dimethylfuran_c0	000625-86-5	Cc1ccc(C)o1
1888	2,5-dimethylheptane_c0	002216-30-0	CCC(C)CCC(C)C
1889	2,5-dimethylhexane-2,5-dihydroperoxide_c0	003025-88-5	CC(C)(CCC(C)(C)OO)OO
1890	2,5-dimethyloctane_c0	015869-89-3	CCCC(C)CCC(C)C
1891	2,5-dimethyloxazole_c0	023012-11-5	Cc1cnc(C)o1
1892	2,5-dimethylphenol_c0	000095-87-4	Cc1ccc(C)c(O)c1
1893	2,5-dimethylpyrazine_c0	000123-32-0	Cc1cnc(C)cn1
1894	2,5-dimethylpyridine_c0	000589-93-5	Cc1ccc(C)nc1
1895	2,5-dimethylpyrrole_c0	000625-84-3	Cc1ccc(C)[nH]1
1896	2,5-dimethyltetrahydrofuran_c0	002144-41-4	CC1CCC(C)O1
1897	2,5-dimethylthiophene_c0	000638-02-8	Cc1ccc(C)s1
1898	2,5-dinitrophenol_c0	000329-71-5	O=[N+]([O-])c1ccc([N+](=O)[O-])c(O)c1
1899	2,5-diphenyltetrazole_c0	018039-45-7	c1ccc(-c2nnn(-c3ccccc3)n2)cc1
1900	2,5-furandicarboxylicacid_c0	003238-40-2	O=C(O)c1ccc(C(=O)O)o1
1901	2,5-hexanediol_c0	002935-44-6	CC(O)CCC(C)O
1902	2,5-norbornadiene_c0	000121-46-0	C1=CC2C=CC1C2
1903	2,5-piperazinedione_c0	000106-57-0	O=C1CNC(=O)CN1
1904	2,5-pyrrolidinedione_c0	000123-56-8	O=C1CCC(=O)N1
1905	2,5-xylidine_c0	000095-78-3	Cc1ccc(C)c(N)c1
1906	2,6,10,15,19,23-hexamethyltetracosane_c0	000111-01-3	CC(C)CCCC(C)CCCC(C)CCCCC(C)CCCC(C)CCCC(C)C
1907	2,6,2',6'-pcb_c0	015968-05-5	Clc1cccc(Cl)c1-c1c(Cl)cccc1Cl
1908	2,6,8-trimethyl-4-nonanone_c0	000123-18-2	CC(C)CC(=O)CC(C)CC(C)C
1909	2,6-bis(1,1-dimethylethyl)-4-methylphenol_c0	000128-37-0	Cc1cc(C(C)(C)C)c(O)c(C(C)(C)C)c1
1910	2,6-bis(1,1-dimethylethyl)-phenol_c0	000128-39-2	CC(C)(C)c1cccc(C(C)(C)C)c1O
1911	2,6-bis(t-butyl)-2,5-cyclohexadiene-1,4-dione_c0	000719-22-2	CC(C)(C)C1=CC(=O)C=C(C(C)(C)C)C1=O
1912	2,6-dichloro-2,5-cyclohexadiene-1,4-dione_c0	000697-91-6	O=C1C=C(Cl)C(=O)C(Cl)=C1
1913	2,6-dichloroaniline_c0	000608-31-1	Nc1c(Cl)cccc1Cl
1914	2,6-dichlorobenzamide_c0	002008-58-4	NC(=O)c1c(Cl)cccc1Cl
1915	2,6-dichlorobenzonitrile_c0	001194-65-6	N#Cc1c(Cl)cccc1Cl
1916	2,6-dichlorophenol_c0	000087-65-0	Oc1c(Cl)cccc1Cl
1917	2,6-dichloropyridine_c0	002402-78-0	Clc1cccc(Cl)n1
1918	2,6-dichlorothiobenzamide_c0	001918-13-4	NC(=S)c1c(Cl)cccc1Cl
1919	2,6-dichlorotoluene_c0	000118-69-4	Cc1c(Cl)cccc1Cl
1920	2,6-diethylbenzeneamine_c0	000579-66-8	CCc1cccc(CC)c1N
1921	2,6-diethylnaphthalene_c0	059919-41-4	CCc1ccc2cc(CC)ccc2c1
1922	2,6-difluorobenzoicacid_c0	000385-00-2	O=C(O)c1c(F)cccc1F
1923	2,6-difluorobenzonitrile_c0	001897-52-5	N#Cc1c(F)cccc1F
1924	2,6-difluorophenol_c0	028177-48-2	Oc1c(F)cccc1F
1925	2,6-difluoropyridine_c0	001513-65-1	Fc1cccc(F)n1
1926	2,6-dihydroxy-2,6-dimethyl-4-heptanone_c0	003682-91-5	CC(C)(O)CC(=O)CC(C)(C)O
1927	2,6-dihydroxybenzoicacid_c0	000303-07-1	O=C(O)c1c(O)cccc1O
1928	2,6-dimethoxybenzoicacid_c0	001466-76-8	COc1cccc(OC)c1C(=O)O
1929	2,6-dimethoxyphenol_c0	000091-10-1	COc1cccc(OC)c1O
1930	2,6-dimethyl-1,3-dioxan-4-ol-acetate_c0	000828-00-2	CC(=O)OC1CC(C)OC(C)O1
1931	2,6-dimethyl-2,5-cyclohexadiene-1,4-dione_c0	000527-61-7	CC1=CC(=O)C=C(C)C1=O
1932	2,6-dimethyl-2-octene_c0	004057-42-5	CCC(C)CCC=C(C)C
1933	2,6-dimethyl-4-heptanol_c0	000108-82-7	CC(C)CC(O)CC(C)C
1934	2,6-dimethyl-4-heptanone_c0	000108-83-8	CC(C)CC(=O)CC(C)C
1935	2,6-dimethyl-4-pyrone_c0	001004-36-0	Cc1cc(=O)cc(C)o1
1936	2,6-dimethylacetanilide_c0	002198-53-0	CC(=O)Nc1c(C)cccc1C
1937	2,6-dimethylanisole_c0	001004-66-6	COc1c(C)cccc1C
1938	2,6-dimethylbenzoicacid_c0	000632-46-2	Cc1cccc(C)c1C(=O)O
1939	2,6-dimethylbenzonitrile_c0	006575-13-9	Cc1cccc(C)c1C#N
1940	2,6-dimethylcyclohexanol_c0	005337-72-4	CC1CCCC(C)C1O
1941	2,6-dimethylcyclohexanone_c0	002816-57-1	CC1CCCC(C)C1=O
1942	2,6-dimethyl-heptane_c0	001072-05-5	CC(C)CCCC(C)C
1943	2,6-dimethylmorpholine_c0	000141-91-3	CC1CNCC(C)O1
1944	2,6-dimethylnaphthalene_c0	000581-42-0	Cc1ccc2cc(C)ccc2c1
1945	2,6-dimethyloctane_c0	002051-30-1	CCC(C)CCCC(C)C
1946	2,6-dimethylphenol_c0	000576-26-1	Cc1cccc(C)c1O
1947	2,6-dimethylpiperidine_c0	000504-03-0	CC1CCCC(C)N1
1948	2,6-dimethylpyrazine_c0	000108-50-9	Cc1cncc(C)n1
1949	2,6-dimethylpyridine_c0	000108-48-5	Cc1cccc(C)n1
1950	2,6-dimethylquinoline_c0	000877-43-0	Cc1ccc2nc(C)ccc2c1
1951	2,6-dinitro-4-trifluoromethylaniline_c0	000445-66-9	Nc1c([N+](=O)[O-])cc(C(F)(F)F)cc1[N+](=O)[O-]
1952	2,6-dinitro-n-propyl-4-trifluoromethylaniline_c0	002077-99-8	CCCNc1c([N+](=O)[O-])cc(C(F)(F)F)cc1[N+](=O)[O-]
1953	2,6-dinitrophenol_c0	000573-56-8	O=[N+]([O-])c1cccc([N+](=O)[O-])c1O
1954	2,6-diphenyl-thiacyclohexan-4-one_c0	037014-01-0	O=C1CC(c2ccccc2)SC(c2ccccc2)C1
1955	2,6-lutidinen-oxide_c0	001073-23-0	Cc1cccc(C)[n+]1[O-]
1956	2,6-naphthalenedicarboxylicacid_c0	001141-38-4	O=C(O)c1ccc2cc(C(=O)O)ccc2c1
1957	2,6-naphthalenedicarboxylicaciddimethylester_c0	000840-65-3	COC(=O)c1ccc2cc(C(=O)OC)ccc2c1
1958	2,6-naphthalenediol_c0	000581-43-1	Oc1ccc2cc(O)ccc2c1
1959	2,6-octadiene_c0	004974-27-0	CC=CCCC=CC
1960	2,6-pyrazinediamine_c0	041536-80-5	Nc1cncc(N)n1
1961	2,6-pyridinediamine_c0	000141-86-6	Nc1cccc(N)n1
1962	2,6-xylidine_c0	000087-62-7	Cc1cccc(C)c1N
1963	2,7-dichlorodibenzo-p-dioxin_c0	033857-26-0	Clc1ccc2c(c1)Oc1ccc(Cl)cc1O2
1964	2,7-dimethylbenzothiophene_c0	016587-40-9	Cc1cc2cccc(C)c2s1
1965	2,7-dimethylnaphthalene_c0	000582-16-1	Cc1ccc2ccc(C)cc2c1
1966	2,7-dimethyloctane_c0	001072-16-8	CC(C)CCCCC(C)C
1967	2,7-dimethylphenanthrene_c0	001576-69-8	Cc1ccc2c(ccc3cc(C)ccc32)c1
1968	2,7-dimethylquinoline_c0	000093-37-8	Cc1ccc2ccc(C)nc2c1
1969	2,7-naphthalenediol_c0	000582-17-2	Oc1ccc2ccc(O)cc2c1
1970	2,7-octanedione_c0	001626-09-1	CC(=O)CCCCC(C)=O
1971	2,8-dichlorodibenzo-p-dioxin_c0	038964-22-6	Clc1ccc2c(c1)Oc1cc(Cl)ccc1O2
1972	2,8-dimethylquinoline_c0	001463-17-8	Cc1ccc2cccc(C)c2n1
1973	2-1,3-benzoselenadiazole_c0	000273-15-4	c1ccc2n[se]nc2c1
1974	2-2-(2-butoxyethoxy)ethoxyethanol_c0	000143-22-6	CCCCOCCOCCOCCO
1975	2-2-(2-ethoxyethoxy)ethoxyethanol_c0	000112-50-5	CCOCCOCCOCCO
1976	2-2-(2-methoxyethoxy)ethoxyethanol_c0	000112-35-6	COCCOCCOCCO
1977	2-2-(2-methoxypropoxy)propoxy-1-propanol_c0	010213-77-1	COC(C)COC(C)COC(C)CO
1978	2-2-(diethylamino)ethoxyethanol_c0	000140-82-9	CCN(CC)CCOCCO
1979	2-2-(hexyloxy)ethoxyethanol_c0	000112-59-4	CCCCCCOCCOCCO
1980	2-4-6tri-tert-butylnitrobenzene_c0	004074-25-3	CC(C)(C)c1cc(C(C)(C)C)c([N+](=O)[O-])c(C(C)(C)C)c1
1981	2-5-dimethyl-2h-tetrazole_c0	004135-93-7	Cc1nnn(C)n1
1982	29h,31h-phthalocyanine_c0	028888-81-5	Clc1c(Cl)c(Cl)c2c(c1Cl)-c1nc-2nc2[nH]c(nc3nc(nc4[nH]c(n1)c1c(Cl)c(Cl)c(Cl)c(Cl)c41)-c1c(Cl)c(Cl)c(Cl)c(Cl)c1-3)c1c(Cl)c(Cl)c(Cl)c(Cl)c21
1983	2-acetoacetoxyethylmethacrylate_c0	021282-97-3	C=C(C)C(=O)OCCOC(=O)CC(C)=O
1984	2-acetonaphthone_c0	000093-08-3	CC(=O)c1ccc2ccccc2c1
1985	2-acetothiophene_c0	000088-15-3	CC(=O)c1cccs1
1986	2-acetyl-4-methylphenol_c0	001450-72-2	CC(=O)c1cc(C)ccc1O
1987	2-acetylbutanolide_c0	000517-23-7	CC(=O)C1CCOC1=O
1988	2-acetylpyridine_c0	001122-62-9	CC(=O)c1ccccn1
1989	2-adamantanone_c0	000700-58-3	O=C1C2CC3CC(C2)CC1C3
1990	2-allyloxyethanol_c0	000111-45-5	C=CCOCCO
1991	2-allylphenol_c0	001745-81-9	C=CCc1ccccc1O
1992	2-amino-1,1,3-tricyanopropene_c0	000868-54-2	N#CCC(N)=C(C#N)C#N
1993	2-amino-1,3,4-oxadiazole_c0	003775-60-8	Nc1nnco1
1994	2-amino-1,7-dihydro-7-methyl-6h-purin-6-one_c0	000578-76-7	Cn1cnc2[nH]c(N)nc(=O)c21
1995	2-amino-1-butanol_c0	000096-20-8	CCC(N)CO
1996	2-amino-2-ethyl-1,3-propanediol_c0	000115-70-8	CCC(N)(CO)CO
1997	2-amino-2-methyl-1,3-propanediol_c0	000115-69-5	CC(N)(CO)CO
[truncated: 6,025 more rows]
[truncated: 33 more columns]
